# Supplementary material for: Telomere dysfunction cooperates with epigenetic alterations to impair murine embryonic stem cell fate commitment
Source: eLife. 2020 Apr 16;9:e47333. doi: 10.7554/eLife.47333 (PMC7192583; doi:10.7554/eLife.47333)
Supplement: Figure 1—source data 1. — Source data of (i) the GFP percentage values represented in the histogram in Figure 1B and Figure 1—figure supplement 1F–G; (ii) Raw Ct values and information relative to the Qiagen qPCR array relative to Figure 1C,D,E and Figure 1—figure supplement 1C,D; (iii) Raw telomere signal intensities presented in Figure A-figure supplement 1A-B. [file elife-47333-fig1-data1.xlsx]

## Sheet: Fig. 1 B
GFP % values of the histogram presented in Figure 1B
genotype		WT								Tert-/-
Biological replicate		n=1			n=2			n=3		n=1			n=2			n=3
technical replicate		1	2	3	1	2	3	1	2	1	2	3	1	2	3	1	2
Experimental conditions	2 days LIF	97.4	96.9	97	97.2	96.8	97	97.2	97	97.4	96.9	97.4	93.5	92.8	94.9	98.2	98.3
	6 days ATRA	1.44	1.63	1.23	1.17	1.05	1.23	1.94	2.11	19.6	18.8	21	12.9	17.6	16.5	26.7	24.4
	6 days LIF	3.47	0.94	2.19	0.82	1.22	0.61	1.94	1.7	32.6	37.3	37.1	30.1	21.7	17.6	34.6	24.4
% of GFP positive cells after FACS analysis. Cells were first gated according to SSC-A/FSC-A. Doublets were then excluded (SSC-H/SSC-W and FSC-H/FSC-W) and GFP positive cells were gated. Values were analyzed and extracted with FlowJo	% of GFP positive cells after FACS analysis. Cells were first gated according to SSC-A/FSC-A. Doublets were then excluded (SSC-H/SSC-W and FSC-H/FSC-W) and GFP positive cells were gated. Value were analyzed and extracted with FlowJo	% of GFP positive cells after FACS analysis. Cells were first gated according to SSC-A/FSC-A. Doublets were then excluded (SSC-H/SSC-W and FSC-H/FSC-W) and GFP positive cells were gated. Value were analyzed and extracted with FlowJo	% of GFP positive cells after FACS analysis. Cells were first gated according to SSC-A/FSC-A. Doublets were then excluded (SSC-H/SSC-W and FSC-H/FSC-W) and GFP positive cells were gated. Value were analyzed and extracted with FlowJo	% of GFP positive cells after FACS analysis. Cells were first gated according to SSC-A/FSC-A. Doublets were then excluded (SSC-H/SSC-W and FSC-H/FSC-W) and GFP positive cells were gated. Value were analyzed and extracted with FlowJo	% of GFP positive cells after FACS analysis. Cells were first gated according to SSC-A/FSC-A. Doublets were then excluded (SSC-H/SSC-W and FSC-H/FSC-W) and GFP positive cells were gated. Value were analyzed and extracted with FlowJo

## Sheet: Fig. 1 C,D,E ; Fig1-supp1, C, D
Raw CT values of Data presented as histogram/Heatmap/PCA in Figure 1C, D, E and Figure 1—figure supplement 1C, D
Biological replicate		n=1	n=2	n=3	n=1	n=2	n=3	n=1	n=2	n=3	n=1	n=2	n=3	n=1	n=2	n=3	n=1	n=2	n=3	n=1	n=2	n=3	n=1	n=2	n=3	n=1	n=2	n=3	n=1	n=2	n=3	n=1	n=2
Well	Gene name	WT PLURIPOTENT-1	WT PLURIPOTENT-2	WT PLURIPOTENT-3	WT 6DA-1	WT 6DA-2	WT 6DA-3	WT 6DA + 6DL -1	WT 6DA + 6DL -2	WT 6DA + 6DL -3	Tert -/- PLURIPOTENT-1	Tert -/- PLURIPOTENT-2	Tert -/- PLURIPOTENT-3	Tert -/- 6DA-1	Tert -/- 6DA-2	Tert -/- 6DA-3	Tert -/- 6DA (GFP+, SA) -1	Tert -/- 6DA (GFP+, SA) -2	Tert -/- 6DA (GFP+, SA) -3	Tert -/- 6DA (GFP-, SA) -1	Tert -/- 6DA (GFP-, SA) -2	Tert -/- 6DA (GFP-, SA) -3	Tert -/- 6DA + 6DL (GFP+, SL)-1	Tert -/- 6DA + 6DL (GFP+, SL)-2	Tert -/- 6DA + 6DL (GFP+, SL)-3	Tert -/- 6DA + 6DL (GFP-, SL)-1	Tert -/- 6DA + 6DL (GFP-, SL)-2	Tert -/- 6DA + 6DL (GFP-, SL)-3	Tert -/- 6DA + 6DL (GFP+, SA)-1	Tert -/- 6DA + 6DL (GFP+, SA)-2	Tert -/- 6DA + 6DL (GFP+, SA)-3	Tert -/- 6DA + 6DL (GFP-, SA)-1	Tert -/- 6DA + 6DL (GFP-, SA)-2
A1	Alb	34.5797	34.3974	34.2387	28.369	30.3315	26.8078	31.336	31.5886	30.4916	39.2884	35.4316	33.798	32.2759	33.5643	33.6705	32.9082	34.8541	32.2978	32.493	32.7742	33.7464	33.3017	35.0275	36.9131	33.337	31.3468	33.2355	33.7439	33.4557	33.5276	32.3658	32.2507
A2	Apoh	36.91	Undetermined	Undetermined	38.0883	Undetermined	31.1944	30.3002	28.9497	30.8732	38.2885	33.6135	Undetermined	32.5653	Undetermined	33.6901	33.7046	33.5176	31.4713	32.2461	33.6304	38.7849	33.821	34.3404	Undetermined	30.8908	Undetermined	33.8109	32.8076	32.8864	Undetermined	30.2717	30.6066
A3	Aqp1	36.9713	Undetermined	Undetermined	28.8334	29.9957	24.9886	29.5053	30.5837	27.7388	33.9248	39.9336	Undetermined	26.3037	26.9998	26.6047	27.6621	29.8223	26.8494	25.9819	27.2858	27.1511	29.1225	32.4704	31.2018	25.3141	23.5397	26.5048	29.5157	31.1796	29.4472	29.6389	29.5133
A4	Bmp4	23.1763	23.5703	23.7855	22.8855	24.5518	20.6639	21.6645	21.3146	23.4081	21.8656	22.718	22.4767	24.3606	25.421	25.5668	24.6826	22.1259	24.4627	25.6699	26.7088	26.9534	20.3919	21.657	22.5708	25.9486	23.8415	27.0187	20.5485	21.3494	21.2287	24.7398	24.7019
A5	Ccr5	38.2774	Undetermined	Undetermined	39.2258	34.818	37.1461	34.58	32.8789	Undetermined	Undetermined	Undetermined	Undetermined	38.6047	Undetermined	Undetermined	Undetermined	35.9253	Undetermined	34.3755	Undetermined	Undetermined	Undetermined	Undetermined	Undetermined	Undetermined	39.9219	Undetermined	36.5415	38.8988	Undetermined	Undetermined	39.1801
A6	Cd34	27.7217	29.4117	29.1419	28.4572	29.8746	25.7696	25.951	26.2344	27.9353	28.6994	29.6413	28.6895	28.2531	28.981	28.6309	27.846	28.8346	27.5346	29.5125	30.6117	30.6391	27.6342	28.6372	28.9421	32.4284	28.6804	32.3459	27.8062	28.2986	28.1384	31.9351	31.2997
A7	Cd3e	25.5685	25.8301	25.9217	33.6082	Undetermined	33.6489	32.9798	32.8772	30.8328	25.2861	26.9536	25.5957	28.1812	28.9211	28.8631	27.6694	27.7846	28.2564	32.3496	Undetermined	33.8579	26.1961	27.9211	27.9851	32.9128	30.5279	Undetermined	25.9336	27.2547	26.9688	31.7495	31.5709
A8	Cd79a	26.9486	27.2463	27.4988	27.9476	29.3701	25.3813	28.9537	27.8256	29.1742	27.2533	28.2685	27.2169	28.4937	28.4079	28.5842	27.8502	28.4725	27.2526	27.4839	29.3715	29.0065	26.998	29.7405	28.3962	27.5212	25.697	28.3504	27.1976	28.3891	27.5953	30.3326	38.8844
A9	Chat	31.0248	31.7081	32.2927	33.403	Undetermined	28.6832	35.1779	39.1154	36.6413	31.6399	32.509	31.6618	31.4346	33.4955	33.5782	31.9078	38.3933	32.5846	32.0097	36.5386	Undetermined	30.9432	32.2084	38.9222	37.7687	34.985	33.781	30.4731	32.394	32.6	32.7243	33.8098
A10	Col10a1	31.1676	30.4206	Undetermined	28.5098	30.3864	26.6294	29.9088	28.7126	30.3053	29.2733	29.3153	29.0123	28.2434	28.5978	28.6827	28.4268	29.6965	29.5387	26.8131	29.9878	29.3256	28.2484	30.387	29.8341	28.2404	26.4154	29.4189	27.9067	29.6726	28.4715	30.5385	31.8036
A11	Comp	30.7549	31.7734	31.4874	31.9166	32.2865	28.4132	31.2315	30.1614	31.3335	31.4666	32.6365	31.6521	30.2053	30.9531	31.175	30.2689	32.9795	29.9451	30.2091	32.3681	31.6342	30.9205	34.4046	31.7851	29.9161	28.5516	31.6287	30.7433	32.3877	31.3716	31.4183	31.3617
A12	Cpa1	33.2162	33.5038	33.233	31.241	31.8595	28.6132	32.244	36.6373	33.7091	33.3614	33.4828	34.7947	30.0224	31.1569	31.9042	29.5198	38.2673	29.6738	32.2015	32.6082	32.8842	34.5528	34.6077	35.8526	34.5351	34.7288	33.5789	35.4711	34.4184	39.1622	Undetermined	34.6697
B1	Ctsk	30.776	30.5365	30.9407	28.7821	30.3171	26.5608	28.2562	27.6817	28.7207	29.6172	30.7493	29.7333	27.7051	28.3937	28.4169	28.5423	30.6737	27.6211	27.2073	28.8799	28.631	29.3542	31.0049	31.9613	27.6544	26.2593	28.9572	28.9327	30.5639	29.9619	29.6402	30.3357
B2	Dcn	36.31	Undetermined	29.8607	24.7383	26.4261	22.3841	21.0228	20.3996	29.8791	39.3511	37.1619	32.52	28.5365	31.4104	30.713	31.1247	33.3141	30.6832	29.1985	29.9663	31.4958	38.079	33.3943	35.4861	31.9748	29.5415	32.7949	31.6203	31.6496	31.6507	28.7676	29.6139
B3	Dcx	Undetermined	Undetermined	Undetermined	26.6375	28.3583	24.7157	Undetermined	31.2595	33.1887	34.3876	Undetermined	Undetermined	31.7719	Undetermined	Undetermined	Undetermined	39.4984	31.9557	32.455	32.8374	Undetermined	34.0189	Undetermined	36.4631	Undetermined	Undetermined	Undetermined	34.1636	Undetermined	Undetermined	32.9035	34.1556
B4	Dnmt3b	21.6449	22.6898	22.513	25.8322	27.3309	22.9356	26.9588	26.5414	24.8588	22.7294	23.6949	22.645	22.9066	23.5047	23.6867	23.1598	23.5342	22.8881	21.5729	24.2356	23.4808	21.8428	23.6632	23.6713	23.3186	21.477	24.7693	21.4094	22.6621	22.4366	25.2503	25.5839
B5	Dpp4	24.7132	24.94	25.2654	26.3841	27.8315	23.29	25.8243	25.3475	25.8946	25.0133	25.7204	24.9899	23.2723	23.7689	23.9173	23.8585	27.1407	23.3893	22.3801	23.7234	23.5321	25.3387	25.3376	27.2749	23.8564	21.7958	25.1518	23.9148	24.7773	24.3996	25.7009	25.9515
B6	Eno1	17.4131	17.9712	17.8636	18.4645	20.26	15.9079	17.9999	18.2938	18.701	17.9248	18.7688	17.8099	17.9664	18.7129	18.7187	18.2834	18.8765	17.9356	17.2028	19.2076	18.6487	17.2561	19.2694	18.8413	18.5404	16.62	19.9004	17.1352	18.1328	17.6386	19.3074	19.7403
B7	Fabp7	32.614	32.7204	33.5309	29.185	31.5253	26.8184	28.7256	29.2472	28.9194	33.7249	38.3365	33.66	31.7316	32.5733	Undetermined	31.5309	32.4859	31.8108	Undetermined	33.5208	36.1704	32.2494	38.1768	34.5114	37.9	35.2634	37.5221	32.8836	33.5948	33.5773	38.9742	37.1503
B8	Fgf5	30.4629	29.8304	30.2222	27.2088	28.3722	24.8904	26.6095	26.7096	27.7828	31.2133	31.4977	30.5806	30.3463	30.8949	31.6524	31.5414	29.4038	31.4484	30.9154	32.4225	32.3075	28.2907	29.4242	30.4507	31.4191	28.6805	34.5344	27.9906	28.8763	28.8126	31.2391	31.4159
B9	Foxa1	32.3564	31.9516	Undetermined	25.8384	27.448	23.4802	29.1559	28.7353	28.9972	30.5322	31.5928	30.3349	25.8911	26.7168	26.621	26.4248	31.9765	25.8214	26.002	27.4778	27.5008	31.7971	32.9027	32.384	31.8201	29.8767	32.9537	31.4507	32.1407	31.5726	30.9021	31.4396
B10	Foxd3	25.8694	27.1682	26.1395	32.7849	35.6919	30.3977	31.6647	32.3587	30.5949	25.5751	27.1068	25.9656	29.1439	30.922	30.5741	29.3224	27.4017	30.1497	30.9573	33.1448	32.9289	26.1224	28.6104	27.2067	34.4666	30.9313	34.8112	25.9433	26.5579	26.6811	31.3246	32.2045
B11	Foxg1	29.5966	29.0037	29.636	24.3125	25.674	21.6831	23.5637	23.1582	24.5621	29.5589	31.3901	29.8907	27.8657	28.4947	27.9502	28.3442	30.1604	27.4883	27.5213	29.5026	29.5793	29.0054	29.9164	30.9151	28.2783	26.3136	29.398	28.8918	30.2258	29.5493	30.3051	31.5423
B12	G6pc	33.7034	35.8563	33.4528	34.1564	33.3928	30.7055	34.9128	34.1881	35.6507	34.9185	37.342	35.6464	33.307	32.8381	34.4079	33.3994	35.4736	33.1633	34.3759	35.1524	34.4431	35.4785	33.1484	35.665	32.5041	31.5295	38.0206	35.1738	33.1748	34.5138	33.4645	33.4698
C1	Gad1	29.4216	29.8462	28.9802	31.3985	34.1362	27.5958	30.4062	30.5012	31.3962	30.4406	32.7574	30.5986	31.1633	31.6427	32.0132	31.8605	30.9887	30.1852	30.7188	31.8386	31.5855	29.8641	31.2994	31.5933	33.5677	29.5429	32.2902	29.6752	31.2569	30.7147	31.7113	31.6097
C2	Gad2	32.9876	35.2866	32.8758	32.8054	34.1708	29.6692	30.2398	30.5664	31.8407	32.9738	30.4354	33.7683	32.4817	33.5692	33.3718	33.6098	32.1878	32.3386	33.0887	31.9155	32.4265	31.0027	32.4236	29.9596	33.1643	30.414	33.3226	31.5905	32.6016	33.4623	32.6505	29.5043
C3	Galc	25.6036	25.8564	25.9639	23.7596	25.7679	21.2844	23.9648	24.3177	24.8368	24.9046	25.9675	25.2766	23.2418	24.3528	24.3962	23.9501	25.3482	23.5732	22.7913	24.4819	24.2345	23.6651	25.4777	25.8351	23.1819	21.6596	24.2501	23.7328	24.6568	24.3101	24.2204	24.3791
C4	Gata1	27.5494	28.5155	28.656	33.998	33.6264	28.3228	33.4478	36.7566	32.7133	30.221	31.7915	30.7193	31.2932	31.7578	33.8689	31.257	31.4511	30.6013	32.7845	32.9112	33.5954	30.642	33.1545	31.8419	32.7198	33.7257	35.6289	30.3866	31.8546	31.3339	37.6258	36.8222
C5	Gata2	28.5261	28.6899	28.4139	22.5254	23.8173	20.6748	25.4873	25.5496	26.2063	27.5991	28.2411	27.3888	25.2534	26.2281	26.3653	25.8553	29.9421	25.6783	26.3655	27.6608	27.8744	28.0034	28.4299	29.3907	29.2042	27.8122	30.5333	26.8167	27.7069	27.9541	28.5357	29.1982
C6	Gata6	28.8773	29.5352	28.2026	20.4208	22.0233	18.1894	21.7517	21.4351	22.2199	25.8091	26.6814	26.1906	20.1498	20.734	20.8765	20.7779	23.3654	20.3227	18.8828	20.6556	22.2092	21.6716	22.7918	24.1657	18.8929	17.3116	20.0013	21.4857	22.252	21.5016	21.9016	22.3236
C7	Gbx2	22.7913	23.5366	23.431	24.9695	26.7572	22.1606	26.9947	26.5836	26.1868	23.6369	24.2254	23.3378	23.9488	24.6336	24.9091	24.5957	24.8827	23.8159	23.2695	24.5787	24.4574	22.8596	23.8616	24.9197	26.5628	24.5101	27.5814	22.014	22.9865	23.1746	27.768	27.9901
C8	Gdf3	23.3881	24.2324	23.7529	31.2686	32.6877	26.9581	30.6873	29.4399	27.1671	23.669	24.4506	23.4478	25.3506	26.2679	26.3404	25.2371	24.1238	24.8257	26.8499	29.5292	28.65	22.6115	24.6251	24.8588	30.3638	28.0192	32.3228	22.8353	23.7639	23.5871	28.6264	29.5583
C9	Gfap	29.6958	29.9749	30.7916	30.3516	34.1836	26.9955	32.2986	32.3051	30.6434	28.7725	29.7726	28.8987	28.635	30.027	29.5197	28.7916	30.5643	29.1715	28.7725	30.8679	31.0064	29.7742	31.5113	31.3306	33.8742	30.4695	29.5916	29.6948	30.8155	30.1902	31.3045	32.4477
C10	Hand1	29.4279	29.4487	29.3096	28.5	29.7174	24.7891	29.2173	30.3025	27.882	27.9263	28.9277	28.1434	28.5181	29.6494	29.8094	29.7026	30.7704	28.7455	30.2676	31.5612	32.1502	28.8935	30.2034	32.847	31.2907	28.371	32.9057	27.9888	29.5702	28.5989	31.4653	31.5174
C11	Hand2	34.5576	34.6864	36.8351	25.9233	27.6573	24.3343	24.9645	25.9496	26.8038	33.7653	38.7225	36.1308	30.9871	36.8331	35.3248	32.8988	35.3754	33.6938	32.3103	34.2323	34.1657	34.2421	35.9305	34.6034	34.2364	33.5627	37.3495	36.8026	38.0566	36.2233	34.3284	33.9699
C12	Hes5	34.1982	37.7076	34.1399	33.2764	37.0043	29.5663	Undetermined	33.997	34.2754	35.4528	35.3953	34.7493	33.888	34.6502	34.7409	33.6236	34.762	33.8895	32.7968	33.8756	33.5884	36.2446	33.2648	35.4194	33.774	30.4555	34.8504	34.9247	35.6752	35.2943	37.5549	34.1984
D1	Hnf4a	29.2415	29.3644	29.2434	27.6099	29.656	23.9319	30.5849	29.6666	28.6077	26.6491	27.213	26.8976	25.012	25.6493	25.8408	25.8679	27.9326	25.2256	24.1962	25.5207	25.5908	26.9066	27.3087	28.6155	25.7766	23.8465	26.6273	25.9955	26.8051	26.308	27.3058	28.2453
D2	Ibsp	35.3658	Undetermined	37.9422	29.5941	31.2711	27.3823	33.0042	35.6635	37.1252	35.8094	37.8395	38.6029	32.5372	33.4514	33.3893	34.4453	37.6949	36.2214	33.6173	33.8998	37.9275	39.0015	38.2621	38.1382	37.421	35.4713	38.252	36.8803	38.1397	37.5395	Undetermined	36.7137
D3	Igf2	27.2576	27.6671	24.3464	17.4694	18.8041	14.84	17.8614	17.2925	19.0004	24.8858	25.493	24.7324	21.5794	22.6001	22.8711	23.6588	28.4425	22.7849	21.6849	22.9813	23.4343	26.9408	27.301	28.7919	24.7859	22.7294	26.2433	25.6372	26.4142	25.9579	26.2305	26.7984
D4	Ins2	31.952	Undetermined	34.7394	32.5794	33.891	29.2039	31.7982	33.9939	32.7238	33.4118	36.3692	35.576	30.8062	31.9567	31.1599	31.2608	33.7455	31.3815	32.7844	34.6053	34.8579	36.2657	35.623	35.6912	34.6686	30.4649	34.9644	33.9355	34.8474	34.8829	32.4284	33.4548
D5	Itgb4	25.7092	26.0051	26.2472	26.2469	27.3894	23.5363	24.773	24.9047	24.9651	24.7811	25.5788	24.7991	24.4847	25.2289	25.2975	25.0056	26.3416	24.9191	24.2997	25.9144	25.8433	24.7615	26.4063	26.4881	25.7395	23.6201	26.8352	24.627	25.4184	25.2418	24.6158	24.9886
D6	Krt10	27.5623	27.6129	27.9321	25.3772	26.959	22.9687	25.5584	25.0092	26.4778	27.6738	28.4961	27.689	26.4242	27.2941	27.2931	27.219	28.3732	26.5356	25.8953	27.5406	26.8549	26.6289	26.6289	29.3284	26.4162	24.5062	27.4928	25.7897	26.5535	26.4021	27.2313	27.5217
D7	Krt14	28.9227	29.1683	29.8041	30.3212	31.9463	27.8251	26.3158	26.3715	27.5917	32.9779	33.7539	32.1871	32.5082	32.3743	32.9122	32.9479	33.6184	32.42	32.8639	33.128	33.1807	31.3277	29.3287	33.2457	30.4786	27.8362	31.308	27.8038	28.4724	29.4601	24.4564	24.9069
D8	Krt19	26.5536	26.7458	27.2208	20.8647	22.4627	18.201	21.558	21.3996	21.7607	23.7739	24.5613	23.8693	19.9464	21.2751	21.335	22.4317	23.8733	21.6467	19.7187	20.8245	20.8946	22.2115	22.9921	24.4442	20.1546	18.6338	20.9544	21.6855	22.4171	21.9231	20.5158	20.8483
D9	Lefty1	22.9252	23.4019	22.5529	26.431	28.0183	23.8788	25.1703	24.7824	24.819	23.3532	24.2048	23.5285	24.4363	25.025	25.4665	24.43	22.7985	24.2153	26.2745	27.5334	27.5526	20.8187	20.9563	22.9932	26.676	24.7855	27.6732	20.3789	21.2147	21.2605	26.4015	26.6537
D10	Map3k12	24.5734	25.1691	24.6464	22.9215	24.4428	20.56	23.2278	22.7589	23.9657	24.958	26.2734	25.2783	24.1857	24.7566	24.8523	24.9906	25.607	24.3743	23.3899	24.7519	24.6736	24.4325	25.3719	25.6567	23.8026	21.9754	24.7927	24.2932	24.8648	24.1577	25.3259	25.8292
D11	Miox	29.2322	28.6934	30.2998	33.7203	35.7397	29.6011	32.1471	32.6285	33.5012	31.3612	31.8509	29.7773	32.2397	32.5407	32.8085	33.2773	32.7617	30.9731	32.2532	33.5205	32.8477	32.6294	33.248	33.8656	34.7273	31.3912	34.2372	31.9824	32.8087	32.8556	36.7709	33.4634
D12	Mixl1	28.2661	28.5937	28.8123	28.8535	31.4017	26.6757	28.9264	29.4982	29.3715	27.7266	28.498	28.4676	28.4272	28.7099	28.7276	28.7714	29.5967	28.5566	28.2174	30.439	29.5273	27.7597	28.4169	29.7737	29.9229	27.6118	36.8373	27.5307	28.4319	28.1932	31.5163	30.7169
E1	Msln	27.503	27.8023	27.9612	29.9595	31.7754	28.2151	26.4456	26.4487	29.132	25.5597	27.0124	25.7757	25.2966	26.434	26.5681	26.3561	27.253	25.8544	26.4858	28.2385	28.239	25.7221	27.6686	27.4208	28.4755	25.8908	29.1678	25.9435	27.1796	26.5993	24.6219	24.9381
E2	Myh1	34.9304	Undetermined	35.9654	39.4415	Undetermined	32.0095	34.9468	36.9659	34.4285	35.7515	38.1839	38.2066	33.2168	36.5885	36.8719	33.4776	37.8756	34.6066	33.7651	34.9613	34.6543	37.5264	38.419	38.2147	34.7371	32.1502	34.7281	36.7809	38.6418	36.5753	38.1976	36.6709
E3	Myh11	29.3459	30.3695	28.7613	23.1816	24.6872	21.234	21.4606	21.2455	22.2671	29.1342	30.993	29.8076	28.9493	30.3215	30.5275	29.8237	30.5926	28.9926	28.5736	30.0202	30.3433	29.2713	31.6326	30.8957	31.3894	28.4129	30.8867	30.0009	30.5272	29.7685	30.3734	30.3597
E4	Myh7	26.2322	26.8118	27.2303	28.6969	30.0245	26.282	29.9501	29.7931	29.3154	27.2634	27.9262	27.5518	26.4941	27.7181	27.9756	26.9596	28.5785	26.7593	26.2258	27.7205	27.5028	26.6719	27.6501	29.2063	24.6024	23.0214	25.748	26.522	27.6449	26.9562	26.9771	26.9901
E5	Myl3	31.2262	32.3125	31.8841	25.5187	27.0242	22.4649	27.6723	27.271	26.6451	32.6031	32.8766	33.7607	26.6589	28.3334	27.8632	28.1831	26.5103	28.2107	26.1952	26.6784	26.8476	25.2366	29.6911	28.8565	22.298	20.8442	22.831	28.7011	29.4114	27.9868	29.0058	28.9667
E6	Nanog	20.869	21.2602	21.6363	29.5261	32.6219	26.7693	27.6289	26.874	25.4951	20.1908	21.2036	20.3914	21.9257	23.4654	23.5803	22.3869	21.8056	22.556	29.0233	29.8983	31.2014	20.2663	21.7869	22.026	27.8958	25.5343	29.3997	20.356	21.3095	20.9828	25.8261	26.31
E7	Neurod1	25.9046	26.556	26.473	27.4488	29.7654	25.543	28.5869	28.6101	29.7322	29.2518	29.9888	29.7026	33.3705	33.1246	31.8717	32.7624	29.6625	30.3329	33.5895	35.2134	33.3664	28.2496	28.3944	30.7425	33.8807	35.5407	34.406	27.6883	28.8301	28.775	31.4325	31.9374
E8	Neurog2	Undetermined	Undetermined	Undetermined	Undetermined	35.1344	29.9514	Undetermined	Undetermined	33.6959	39.0797	Undetermined	Undetermined	39.8862	Undetermined	Undetermined	Undetermined	Undetermined	39.7948	32.2057	33.9284	34.1259	Undetermined	Undetermined	39.4383	35.5317	37.1854	39.124	39.3008	Undetermined	Undetermined	Undetermined	Undetermined
E9	Nkx2-2	33.956	Undetermined	34.8211	34.8719	36.4504	33.6629	35.3304	33.2872	34.0136	34.2364	Undetermined	35.2179	32.3477	34.6496	31.8926	34.4148	36.8289	Undetermined	32.6859	35.3237	32.6899	34.2247	34.7167	Undetermined	32.3961	30.9194	34.5221	31.6164	32.9357	36.1695	33.885	34.2945
E10	Nppa	28.1639	28.2034	27.6918	27.8153	29.1964	25.2744	28.1787	27.6989	28.573	28.2653	29.296	28.0233	27.8977	28.6749	29.3565	29.4472	29.3381	27.8731	27.8388	29.3897	29.4091	27.1526	28.8964	29.1718	28.2026	25.7396	28.7657	27.6	28.2651	28.4853	29.5843	30.4169
E11	Olig2	33.3168	Undetermined	35.1886	31.99	36.6686	Undetermined	32.364	33.4019	33.4632	32.6956	34.6144	33.2196	31.7297	33.3022	33.4862	33.2207	33.6483	31.8178	32.8934	32.7127	32.5494	32.749	32.5916	35.6073	31.9595	29.7287	32.4909	33.253	34.323	32.8495	32.8199	34.5599
E12	Otx2	25.3106	25.6573	25.8193	30.6116	32.0003	28.0949	30.5359	32.2163	28.2105	27.5438	28.4471	27.5047	28.7923	29.6821	29.6487	29.4378	26.2336	28.5074	27.6064	29.8082	29.2787	24.6466	26.924	26.0058	30.5655	28.2215	31.3647	25.2324	25.8064	25.7253	29.6757	30.4672
F1	Pdgfra	30.172	30.3258	29.5713	22.5147	24.3068	19.909	23.3062	22.7525	23.2977	27.5901	28.6088	27.7503	21.1857	22.3046	22.2201	21.9022	24.3062	21.7923	20.389	22.0129	21.693	22.5651	24.3771	25.0228	19.9105	18.5885	21.2144	22.6092	23.5343	22.701	22.9158	23.3997
F2	Podxl	25.94	26.5008	26.3029	21.8047	23.2182	19.5363	22.711	22.3134	23.2022	25.205	26.2949	25.3705	22.2729	23.2712	23.2524	23.5515	24.6656	23.3763	20.8674	22.8293	22.4476	22.9923	24.4859	24.7292	20.9419	19.2634	22.2622	22.5745	23.3238	22.5854	22.8746	23.5591
F3	Pou4f2	26.1865	26.9004	26.5053	32.7704	32.2895	30.8231	33.4378	32.6143	30.1891	26.3862	26.989	25.8826	30.7763	33.5317	32.8509	35.5461	25.447	31.2149	33.3783	33.8519	29.9366	23.8265	25.3695	25.7507	31.2193	28.9821	33.2689	23.6107	24.4721	24.456	29.8905	29.7019
F4	Pou5f1	18.4613	18.8818	18.9527	23.7342	25.4762	20.3895	25.1835	24.1839	22.2538	18.6564	19.4343	18.663	20.5124	21.1925	20.9727	19.9847	19.5677	20.1734	21.2145	22.8648	Undetermined	17.9556	19.5844	19.7913	23.3161	21.0269	24.4917	17.9056	18.7934	18.6347	23.7213	24.0304
F5	Prom1	27.1906	27.2799	27.5275	24.9317	26.8933	22.6198	29.1807	28.4272	28.6052	27.394	28.5254	27.4027	28.1577	28.8746	29.8613	28.7547	27.6214	29.4689	29.5149	31.2559	30.6751	25.9472	28.5644	27.9554	32.6421	29.9956	33.9331	26.955	27.8783	27.3615	31.1799	32.0016
F6	Ptcra	28.8832	31.8687	29.4733	28.8792	32.0198	25.8269	28.1752	29.6629	30.3303	29.0085	31.9482	30.7368	28.7778	31.2262	31.7778	30.5758	31.2184	28.8997	27.9991	30.1498	29.8922	30.3804	31.1812	30.8466	29.8353	27.2345	29.2677	30.5448	32.2015	30.7208	32.3126	30.6144
F7	Rcvrn	25.9801	32.6416	28.7249	26.4071	30.8078	25.5766	26.2336	28.3554	28.9782	26.224	30.0118	28.8835	26.4977	29.5596	28.8928	29.6138	28.4213	26.9218	25.9823	27.6942	28.0035	28.4104	29.8673	30.3089	28.3595	25.3459	28.2638	27.6604	30.3438	28.6652	30.1886	29.4446
F8	Runx1	30.503	30.6749	29.3808	24.179	25.6144	21.346	22.4176	21.9287	22.9718	26.6468	27.3659	26.7083	21.5851	22.2258	22.4701	21.9025	25.1565	21.5369	20.6556	22.4274	22.2384	23.6098	24.7809	25.4934	22.5101	20.449	23.5346	22.9589	23.9318	23.7616	22.2902	22.6699
F9	Ryr2	26.8876	27.1646	27.3941	24.4844	26.1553	22.3958	26.2373	25.7938	26.7697	27.5078	28.5335	27.603	26.2782	27.4481	27.5833	28.2837	27.5813	26.7364	24.97	26.9293	26.6199	25.7959	27.9153	27.9	23.7107	21.9685	24.8391	26.6814	27.5954	26.7936	27.4424	27.5172
F10	Sftpb	30.1452	30.6427	29.8676	30.1365	31.7311	27.4152	29.2284	29.4989	30.3345	29.6621	30.5728	29.9857	30.3257	31.15	32.3363	30.6556	32.1758	30.543	29.7791	31.1873	31.5873	30.8262	31.3297	29.5445	30.3602	27.8393	30.7701	29.6993	31.6529	30.7784	31.8347	31.7509
F11	Sftpd	30.651	31.6309	31.7043	33.6129	37.7867	31.4539	31.3068	31.938	31.7117	30.9699	32.8118	32.9365	27.7809	28.3967	28.8379	28.6434	30.9684	27.9392	28.8168	30.0187	29.8018	29.5019	28.9209	31.6183	32.7334	30.53	35.5831	28.7897	29.5257	30.1786	28.9477	28.8595
F12	Slc17a6	32.4937	Undetermined	Undetermined	36.3859	Undetermined	34.1393	31.654	32.6745	32.5757	38.3944	Undetermined	Undetermined	35.6358	33.4569	32.4707	39.2964	39.962	36.7911	36.4872	38.1373	39.1988	33.7224	38.1166	39.6238	33.6575	30.5834	39.7555	31.755	32.6183	31.4924	32.6495	33.4987
G1	Slc17a7	26.8242	27.4646	27.5124	29.58	31.4795	27.1321	28.924	27.7279	29.2227	28.6201	29.6725	28.4518	27.6238	28.3009	28.2	27.241	31.8221	27.505	27.9861	29.8272	30.6473	29.6729	32.8613	31.8562	28.9529	26.807	29.4904	29.354	29.9789	30.155	31.4137	32.2311
G2	Slc2a2	33.2926	33.95	33.4892	30.9247	31.991	27.8086	31.4803	31.2623	33.7206	31.1973	32.9144	32.2135	29.9749	30.2961	31.3648	30.9752	32.9483	30.2853	29.4656	30.9113	30.3638	30.5121	32.4065	38.2432	29.6591	27.8723	31.9	30.9172	31.8204	31.1954	31.6797	32.4688
G3	Slc32a1	30.2245	31.6663	29.9314	32.4684	33.4608	30.2696	32.6179	32.535	32.547	29.3719	30.9934	29.1967	31.7243	32.7327	31.7953	31.678	31.3072	31.9576	31.6219	36.5402	33.454	31.6526	32.5685	31.7608	33.9922	33.4964	38.4813	29.6534	31.7238	31.7074	33.6167	38.2212
G4	Smtn	25.362	25.6207	25.4381	24.6224	25.9647	21.9542	24.4375	24.3332	24.8346	25.555	26.7047	25.5993	24.6463	25.5127	25.43	25.2223	26.5778	24.8767	23.277	25.8008	25.3914	25.1471	27.9714	26.7046	23.6563	21.8085	24.9476	25.0272	25.9874	25.7277	24.8401	25.3663
G5	Sox17	33.2854	Undetermined	34.3183	27.5642	29.5104	24.3852	27.1355	27.3042	25.8502	31.6828	31.1547	30.1623	24.421	24.8466	24.7799	25.253	27.2041	24.7411	23.2131	25.2629	24.6044	25.8077	27.2809	27.7201	22.2472	20.3378	23.5142	24.9799	25.7109	25.1835	23.7218	24.4244
G6	Sox2	21.1754	21.6408	21.41	25.8358	27.3878	23.7547	25.8679	25.5394	24.8342	21.0065	22.2224	21.1841	23.7873	25.4261	25.4852	23.9326	22.2203	24.4136	28.9642	30.4962	30.6024	20.6017	23.2409	22.1623	28.5248	26.4418	29.499	20.7497	21.7057	21.3653	26.7277	27.263
G7	Sox7	32.21	31.5633	32.5229	26.1583	28.2268	22.6197	27.9044	27.8322	26.628	25.7409	26.6389	25.6474	21.797	22.5698	22.7109	22.4212	25.2328	21.7006	20.8796	22.777	22.3375	23.5141	24.4202	26.0112	20.7473	18.8057	21.9728	22.63	23.4808	22.8093	23.3974	23.9399
G8	T	30.8519	32.59	30.6079	30.9693	32.2228	28.5343	31.7085	32.4104	32.3189	31.4543	31.4834	29.9653	32.4464	32.3286	33.6286	31.8967	31.6487	30.99	32.257	33.7051	37.1082	29.9554	29.815	30.7039	32.2155	34.7237	32.6605	29.55	29.8754	29.7481	36.8032	37.9106
G9	Tat	32.3948	32.2366	33.9953	32.988	32.819	29.6552	32.3628	31.1791	31.7347	32.6454	32.7571	33.3485	32.4818	34.3959	33.8004	33.5588	33.0313	29.4762	31.2583	33.2802	34.5226	32.4737	33.5956	33.4187	32.8727	31.3328	33.5256	33.3502	34.2582	33.8225	31.8744	32.846
G10	Tyr	Undetermined	35.7046	37.4527	Undetermined	33.1405	37.4689	37.1439	33.9541	35.6322	38.0199	36.5734	33.8749	Undetermined	36.1586	34.3738	36.9065	37.1382	35.489	36.6776	39.0803	39.2894	38.0931	35.6001	36.2628	34.9293	36.8973	33.6116	39.4871	36.9423	38.306	38.0762
G11	Zfp42	18.8526	19.7008	19.8985	24.9638	27.4137	22.0096	25.778	24.8957	23.575	19.4498	20.4162	19.6579	21.2356	Undetermined	23.1827	21.8203	20.8065	21.9188	22.5513	24.6835	24.2667	18.7675	20.2584	21.6891	23.5083	22.0126	24.9111	18.635	19.8894	19.7373	24.2157	24.4515
G12	Zic1	30.3863	30.9914	30.3496	24.4325	25.9525	22.1947	23.3674	22.8947	24.5759	31.1802	32.1724	31.1753	27.9337	29.4615	29.7081	29.8755	31.0012	28.3173	27.6469	28.4858	28.8248	29.6761	29.9365	31.4979	26.8561	24.7071	28.1456	28.8243	29.6598	29.3579	29.4263	29.463
H1	Actb	15.9222	16.6398	16.5851	15.363	16.8932	13.3567	14.6713	14.7367	15.4761	16.5376	17.362	16.4636	15.3155	15.8481	15.9964	15.8779	16.9456	15.404	14.8024	15.9352	15.6731	15.5069	16.911	17.3702	14.7794	13.5022	15.9	15.5117	16.2236	16.1273	15.6545	16.1661
H2	B2m	23.7076	23.8881	23.8425	19.3332	21.2616	16.5969	18.3993	18.1445	19.2263	22.6225	23.5433	22.7012	19.1909	19.994	20.2339	20.3711	21.6377	19.2781	18.3319	19.3951	19.3989	19.8014	20.6896	22.7979	18.3947	16.4745	19.3959	20.1424	20.898	20.3672	19.6137	19.4981
H3	Gapdh	16.9913	17.6516	17.5008	17.4544	19.3589	14.9628	17.3931	17.2577	18.1312	17.6501	18.4836	17.6182	17.6398	18.3163	18.4499	18.0047	18.1913	17.6205	16.6306	18.514	18.2126	16.5275	18.3662	18.3817	17.9147	15.8046	18.9866	16.6549	17.4417	17.1141	18.9166	19.0111
H4	Gusb	24.4867	24.6644	24.9825	23.2029	24.9095	20.7117	23.4043	23.1953	24.2923	23.6534	24.673	23.9238	21.4531	22.4549	22.4883	22.3621	24.5617	21.7889	20.7615	22.3833	22.2118	22.7908	23.8848	24.935	21.4465	19.7409	22.6229	22.6528	23.6863	22.9888	23.1944	23.4823
H5	Hsp90ab1	16.6109	17.2128	16.9941	16.9132	18.617	18.5532	17.3995	17.2692	17.9556	16.9153	17.8957	17.0179	16.9407	17.8274	17.9901	17.5047	17.6505	17.032	16.4848	18.2619	17.9622	15.81	17.6868	17.892	17.5104	15.753	18.8006	16.2203	17.1691	16.9222	18.7077	19.0227
H6	MGDC (Mouse Genomic DNA contamination	36.6907	Undetermined	37.8942	37.3165	Undetermined	35.6021	37.3289	39.58	36.3908	37.5994	38.49	38.1889	36.7398	Undetermined	38.2043	39.7797	36.7175	35.8333	36.9552	37.6604	39.8797	37.6385	36.3906	35.2321	39.9124	35.7143	38.4612	36.83	39.8229	36.8185	39.7205	36.1828
H7	Reverse transcription control	19.8546	20.3912	19.9138	19.9669	20.4938	17.2409	19.9868	19.3893	19.9665	19.9425	20.5375	19.8028	19.8877	20.5714	19.8205	20.2702	20.3995	18.9482	20.1672	20.6956	34.1871	19.8725	20.2779	20.2379	19.8949	17.5876	19.9735	19.8836	20.4131	19.7381	19.9183	20.2433
H8	Reverse transcription control	19.8607	20.3352	21.142	19.9466	20.451	17.1348	19.942	19.4296	19.9231	19.9237	20.5537	19.8198	19.8448	20.4908	19.8276	20.1434	20.461	18.9733	20.2132	20.7088	19.96	19.93	20.2689	20.1801	19.8958	17.6781	19.9438	19.9135	20.4671	19.7281	19.9157	20.1807
H9	Reverse transcription control	19.8602	20.6876	19.9368	19.9299	20.5876	16.9892	19.9597	19.4638	19.9979	19.9413	20.5873	19.8983	19.8275	20.7992	19.8817	19.9789	20.5894	19.1462	20.1956	20.7877	19.9757	19.9357	20.3452	20.2635	19.8787	17.5213	19.9866	19.9136	20.5113	19.7347	19.9077	20.2353
H10	Positive PCR Control	17.827	17.841	17.3625	17.7044	17.4641	14.5695	17.9523	16.3308	17.411	17.7693	17.4888	17.3557	17.7884	17.4245	17.4291	18.0163	17.5198	16.4859	17.8158	17.3431	17.3654	18.1677	17.3129	17.2842	17.6978	14.3787	17.3545	17.6414	17.4267	17.47	17.6113	17.327
H11	Positive PCR Control	17.825	17.7705	17.334	17.7913	17.5055	14.682	17.922	16.5904	17.3316	17.8178	17.3586	17.2956	17.8624	17.4202	17.3973	17.9387	17.3956	16.4744	17.7961	17.3077	18.1859	18.131	17.2678	17.3616	17.6508	14.3204	17.3547	17.7603	17.2967	17.4276	17.6043	17.358
H12	Positive PCR Control	18.2934	17.8731	17.6816	18.2057	17.79	15.8491	18.4387	17.1825	17.7956	18.2821	17.6096	17.7554	18.2972	17.7896	17.6186	18.4305	17.7092	16.9496	18.7647	17.6985	18.2573	18.6701	17.5929	17.92	18.4709	15.844	17.8432	18.28	17.5865	17.7852	17.9292	17.6261
	*undetermined = insufficient signal at conclusion of PCR amplification to be assigned a signal
	Two genes, Dnmt3b and Podxl, were excluded from the PCA/heatmap analysis: Qiagen incorrectly assigned Podxl as a murine pluripotency marker, and the Dnmt3b array primers are not specific to active isoforms (our own unpublished data).

## Sheet: Fig. 1 C,D,E ; Fig1-supp1, C,D-
Gene list of the qPCR array
Quiagen RT2 profiler PCR array Mouse cell lineage identification Cat.no. 330231 PAMM-508ZA
Pluripotency Markers
Dnmt3b, Gdf3 (Vgr-2), Lefty1, Nanog, Podxl, Pou5f1 (Oct4), Zfp42.
Germ Layers
Ectoderm: Fgf5, Foxd3, Otx2, Zic1.
Neuroectoderm: Gbx2, Neurog2.
Mesoderm: Bmp4, Cd34, Dcn, Gata2, Hand1, Igf2, Mixl1, Pdgfra, Runx1 (AML1), T (Brachyury).
Endoderm: Foxa1, Gata1, Gata6, Hnf4a, Sox17, Sox7.
Ectoderm Progenitors
Neuronal Progenitors: Fabp7, Hes5, Prom1, Sox2.
Immature Neurons: Dcx.
Immature GABA Neurons: Gad2, Slc32a1.
Limbal Progenitors: Eno1, Msln.
Motor Neuron Progenitors: Foxg1, Olig2.
Oligodendrocyte Progenitors: Nkx2-2, Olig2.
Mesoderm Progenitors
Early Cardiomyocytes: Hand2.
Early B Cells: Cd79a.
Early T Cells: Cd3e, Ptcra.
Muscle Stem Cells: Cd34.
Endoderm Progenitors
Pancreatic Islet Cells: Krt19.
Hepatic Stem Cells: Apoh, Dpp4, Map3k12.
Ectoderm Terminal Differentiation Markers
Keratinocytes: Krt10, Krt14.
Melanocytes: Tyr.
Mature Neurons: Neurod1.
Cholinergic Neurons: Chat.
GABA Neurons: Gad1.
Glutamatergic Neurons: Slc17a6, Slc17a7.
Astrocytes: Galc, Gfap.
Ganglion Cells: Pou4f2.
Photoreceptor Cells: Rcvrn.
Mesoderm Terminal Differentiation Markers
Skeletal Muscle Cells: Myh1.
Smooth Muscle Cells: Myh11, Smtn.
Cardiomyocytes: Myl3, Myh7, Nppa, Ryr2.
Osteoblasts: Ibsp.
Osteoclasts: Ctsk.
Chondrocytes: Col10a1, Comp.
Macrophages: Ccr5.
Endoderm Terminal Differentiation Markers
Hepatocytes: Alb, G6pc, Tat.
Cholangiocytes: Itgb4.
Beta Cells: Ins2, Slc2a2.
Exocrine Cells: Cpa1.
Lung Cells: Sftpb, Sftpd.
Proximal Tubule Cells: Aqp1, Miox.

## Sheet: Fig1-supp1 A, B
Data Figure 1—figure supplement 1A, B.
WT	Tert -/-
1.14596e+06	338094		Raw telomere signal intensities (in arbitary units)
1116818	566596
436752	483013
416318	61837.8
1.26741e+06	21495
1.00011e+06	280227
261969	197470
198470	165251
1.02757e+06	14693.3
1.14718e+06	13652.5
1.85911e+06	195982
823569	19736
703408	220015
1.77602e+06	170757
1.71578e+06	134811
1.5817e+06	134040
1.29978e+06	69167.4
1.28558e+06	208514
1.22353e+06	340364
1.2722e+06	48144.7
13808.5	75268.2
694953	199522
624088	306005
1.40176e+06	214601
1.59992e+06	64424.4
1.28087e+06	42194.8
1270525	106546
887275	306005
824690	214601
1.37015e+06	423096
1.10491e+06	163691
1.20869e+06	362698
1.32042e+06	141956
1.08663e+06	47777.4
1.14434e+06	210331
1.23652e+06	165343
1.7078e+06	31986.2
1.71083e+06	62858.2
767696	36733.2
793341	19004.4
1.13678e+06	100835
640566	39405.4
2.23177e+06	102829
2.07579e+06	82851.6
1079872	44305.9
1.08115e+06	94106.6
816075	82827.3
3.00818e+06	35243.7
1.7135e+06	31669.7
1.10585e+06	286269
678958	184154
2.07008e+06	277187
1.87027e+06	221618
2.28865e+06	137536
1994006	136938
1.38163e+06	185610
1.13567e+06	155127
1.48305e+06	316019
1.0799e+06	225368
1.17135e+06	237884
1.35691e+06	300922
843559	141018
1154236	13831.5
806841	35733.4
1.39498e+06	17979.7
797902	34278.9
1.35171e+06	18354.5
697796	15971.3
1.94124e+06	335195
1.42389e+06	24094.6
1.94609e+06	15888.1
2.97323e+06	283422
2.17093e+06	222095
2.00887e+06	200329
2.63611e+06	284694
2.18219e+06	92687.8
2.1547e+06	92333.6
2.16664e+06	117409
3.50536e+06	14497.7
2.98068e+06	1.46536e+06
2.09359e+06	354588
2.92178e+06	357239
1.89485e+06	62072.6
1.00889e+06	38267.1
931206	33877.2
2226867	24065.7
1.4078e+06	19779.4
2.20129e+06	78064.1
1.3819e+06	149153
1.56129e+06	119036
1.0564e+06	80599.1
1.28527e+06	147982
1.40433e+06	129107
3.11824e+06	77335.4
2.21301e+06	62745.2
2.29906e+06	39430.7
1.67927e+06	331300
1.45823e+06	298064
1.49327e+06	27699.3
1.31329e+06	12098.4
405014	206901
402670	195582
1074261	36737.2
1.48661e+06	20396.7
871598	13836.9
1350370	0
1.27939e+06	164147
1.20902e+06	137326
1.02796e+06	97702.3
1.7318e+06	68331.8
365939	79626.3
734767	240676
1.77857e+06	167980
912972	135909
837548	61109
2.67035e+06	54605.3
893692	75597.7
708993	31439.9
844173	20148.9
748299	13815.2
722488	205242
687685	121567
709990	57695.4
1.4242e+06	32817.7
696662	252720
671338	181025
1.06324e+06	87982.1
527622	112046
970909	97811.2
922709	96252.3
734338	89080.1
474711	78661.5
1.22899e+06	70685.2
1.11383e+06	252458
804991	64053
752421	56388.3
1.42694e+06	39050.2
1.87015e+06	159701
1.82293e+06	20688
471678	159931
2.32244e+06	143545
1738288	133390
1.88401e+06	31807.9
1.03348e+06	28543.6
458001	156340
450160	132562
1.18385e+06	267621
1.00951e+06	116529
1.20736e+06	223926
1.06246e+06	10751.5
1.91678e+06	82419.6
1.80402e+06	280740
1.18963e+06	267956
1.66141e+06	233135
2.00513e+06	171568
3.95928e+06	68991.9
3643760	63285.4
608618	169670
380300	180792
2.30562e+06	115120
2.24355e+06	9473.57
818516	163289
752213	56561.1
783904	51313.5
774105	45698.5
2152932	41565
1.85238e+06	39373.2
1.75411e+06	142924
455293	345100
343489	292840
3.01174e+06	15032.4
1.49206e+06	368017
599104	206181
1.78694e+06	191096
775844	248760
1.28681e+06	171716
771246	105136
577353	94061.2
1.46347e+06	91701.2
644662	47561.9
652865	100592
427200	54902
623484	51987.3
423379	50506.1
2.18481e+06	49549.5
2068229	277994
749954	125147
700759	79779.7
400528	68259.2
345434	68058.6
1.23593e+06	204757
1.09859e+06	124139
518828	261799
208627	147809
1.66547e+06	23937.1
1.35636e+06	17720.8
1.06739e+06	418655
783442	418655
2.1616e+06	418655
2.07678e+06	418655
1.60296e+06	23937.1
1.54804e+06	17720.8
1.47237e+06	273012
1271396	141960
782770	31663.2
632289	24050.2
1.7214e+06	94526.8
1.32649e+06	94526.8
1.20478e+06	65070.2
2.06403e+06	11175.4
2.01942e+06	294374
229247	259393
172259	263091
1577225	245124
569112	42497.5
693561	37253.1
460569	28466.2
616105	18459.5
327262	37213.6
1.34443e+06	36272.4
489660	76122.5
330560	52330.7
1.2094e+06	18423.1
486368	110776
424977	63083.2
1.22758e+06	117588
928403	97318.5
645154	51052.6
1.02108e+06	13699.6
737260	10752.8
1.25921e+06	68455.6
682516	62498.9
668251	326558
609485	317657
1.05116e+06	67067.4
880434	332899
1174250	32438.2
534440	188908
880434	139433
1.46027e+06	334186
860237	286655
483522	16288.7
1.18192e+06	304470
1.10377e+06	227661
1.01825e+06	191864
1.24605e+06	348203
801308	339098
757125	14938.2
689192	286986
1.73512e+06	79730.6
795972	93544.6
820295	35393.1
957240	87223.2
631834	28934.5
625071	35433.4
493478	176447
745672	22039.9
1.19003e+06	64247.4
800305	20005.5
1.10429e+06	52831.2
1.54547e+06	27376.3
457288	11236.6
1.34634e+06	32309.1
3.80404e+06	511170
2.43694e+06	482392
900600	29082.3
710176	299615
939202	228424
671566	140732
731753	220028
832138	122858
882964	396627
849048	285618
777370	141900
701938	141900
480889	31803.6
930601	226987
771583	223247
1.65945e+06	125716
938610	101959
610608	196632
582829	165821
645825	162544
553119	133882
882470	17349.4
794715	81620.4
1.69045e+06	8363.87
800655	24768.7
670115	27978.5
884655	117328
430794	129470
1.08258e+06	64815.9
594084	22903.8
456999	24013.5
958500	18727.4
1.11963e+06	195274
1.61062e+06	127379
1.40566e+06	83898
1096846	53591.9
1.06955e+06	38567.7
1.27949e+06	142480
1.0439e+06	332927
976189	189850
951675	401260
745051	239953
1229774	385269
1.21324e+06	73278
1.61357e+06	272398
1.55525e+06	49941
671566	97235
622995	38566.7
1.42911e+06	28821.4
1.32761e+06	77232.6
883671	309898
807880	60969.1
1.77332e+06	10803.3
1.24948e+06	187702
1.20073e+06	89661.3
1.61433e+06	55991
1.32681e+06	67891.9
2.11595e+06	40374.2
1.24007e+06	46970.1
1.64405e+06	24518.4
878002	11302.5
1.22083e+06	36542.5
716726	420002
675730	397796
1.05929e+06	383755
752143	317722
783624	18988.2
862663	82108.8
874808	62551.4
815411	14745.1
757445	270423
570184	29838.7
1.07512e+06	34069
717994	282161
1.01555e+06	71968.8
1.50503e+06	78113.8
738071	58121.1
714979	254055
1.65877e+06	32597.8
2.04296e+06	87443.9
1.57866e+06	20944.5
874808	356045
834535	11910
1.34266e+06	12771.9
1.35071e+06	86563.2
1.54342e+06	289148
1.21215e+06	186887
869261	79856.1
921293	32551.3
768221	387957
833857	202993
987096	14539.9
1.11294e+06	52461.1
958133	27421.7
887469	27717.3
460642	30589.5
161416	115936
811227	338247
802802	318731
382283	74941.7
331652	242062
801044	288652
735373	254849
516451	312394
817096	48707.2
1.2441e+06	45048.6
1.05562e+06	12545.8
600673	161799
575115	104403
345179	44923.2
296139	75699.9
1.55206e+06	85130.6
898087	37782.7
1.05135e+06	291861
1.15207e+06	30821.1
794315	296211
758119	176975
409999	126020
388590	445418
792899	64367.9
743117	439901
1.2763e+06	378861
1106936	452497
1.10377e+06	255770
932031	45973
1462226	426338
811114	417362
954557	538087
885676	385027
2.29053e+06	410854
1.14855e+06	101355
1.05145e+06	338567
1.22645e+06	371768
1.02046e+06	529729
1.55406e+06	227614
1.33562e+06	197035
2033297	71262.4
1137461	391169
914251	273988
974122	225312
695004	111393
593026	281629
896556	72675.2
812683	77542
1.01213e+06	299336
1000483	499758
622889	327736
519661	206083
1.34223e+06	55673
382239	662191
1.23008e+06	70253.3
363771	105716
1.85057e+06	251083
1.63057e+06	308192
2.77221e+06	56682.2
1953602	416206
1.75765e+06	576824
1.2347e+06	146801
1.17325e+06	206734
845507	69627.9
771515	26289.7
1.00132e+06	37289.6
972598	127832
1.47817e+06	47898.5
1.14134e+06	75699.9
891112	17194
862032	47018.5
1128606	18584.6
1.2646e+06	253935
1.23937e+06	116353
1.12873e+06	126020
1.89367e+06	172072
1.0102e+06	60364.2
969681	328062
1.91448e+06	13781
1.79822e+06	38463.4
876986	78620.4
848056	25278.5
1.70309e+06	290612
1.58498e+06	22362.8
1.11494e+06	229786
1.35284e+06	230157
1256408	45484.6
930039	276452
850515	245218
1.03192e+06	223112
659260	13432.6
655888	23961.3
1113191	374227
1.81972e+06	134723
1.07674e+06	91031.9
1.05946e+06	80314.4
970430	20470.6
986650	12206.7
1.63317e+06	185294
1.46225e+06	16727.7
750545	25148.1
745681	325513
986113	155894
964120	33915.7
772740	299065
768872	266061
1.04536e+06	405319
1.01405e+06	294843
873387	51758
1.01995e+06	200130
1.04638e+06	62020.7
813096	11773.5
624582	44035.4
558151	30616.8
1280616	16663.2
1.33735e+06	24083.1
449593	365464
422922	33197.1
943942	31403.6
687212	280924
588873	240066
892626	124978
1.02531e+06	97970.3
892462	149960
1.02672e+06	44975.4
702952	151424
809410	15597.5
757161	237752
674503	94690.7
720208	206889
386613	29124.2
903263	10511.4
1.18662e+06	72579.6
1.06562e+06	72660.2
1.19258e+06	30051.4
674870	16606.6
608101	77151
831634	110751
775564	58627.8
1.547e+06	58627.8
768137	28633.1
1.20607e+06	13205.1
724510	14063
1.28659e+06	412620
754720	93532.2
769090	262798
1.21383e+06	59526.6
973708	34566.9
852115	136228
823986	52556.7
799902	77450.6
1.23617e+06	56856.1
640523	40458.7
640856	53719.3
1.14036e+06	22039.9
1.3751e+06	25223.5
1.02686e+06	11330.8
1.03718e+06	27421.7
1.11562e+06	82244.7
1179302	20535.8
1.02791e+06	14015.1
1.07059e+06	15456.2
929535	12997.9
693107	160044
650052	47002.4
1.11524e+06	19883
1.08042e+06	13092.1
877441	29056.2
860378	12206.7
800225	233616
958207	86227
654366	54263.4
797138	91618.3
842642	125192
1.0538e+06	38022.6
1.04458e+06	325098
786210	224159
770305	322161
478683	117511
1.40119e+06	320947
1.3537e+06	58870
698551	215567
775341	482850
664226	354553
534264	350024
554811	30599.7
568672	262057
1147009	306329
1005756	73127.3
1.28538e+06	101818
1.82096e+06	38174.3
1.65446e+06	260951
1132027	94953.3
472065	324156
973438	58458.3
406763	70279.1
1.33696e+06	178556
851055	98066.8
767334	12997.9
691673	86826
741039	33516
755000	163932
747776	510557
721540	391647
663923	193366
649053	261682
1.1759e+06	322738
742952	505318
1.36397e+06	324093
1285099	78068.2
1.13045e+06	116594
1.09554e+06	18374.7
1.54043e+06	134557
1.49163e+06	207846
1.1142e+06	37660
1.08746e+06	111124
1.38565e+06	35177.4
376619	343992
1.381e+06	242799
1.34682e+06	261161
1.19229e+06	95328.7
743448	35132
726573	499871
989768	23378.8
984050	14180
916620	248147
837807	271984
1.10661e+06	328286
1.06886e+06	102188
550932	44905.8
544050	52689.9
1.01151e+06	139831
996902	270936
918652	29257.4
347855	122210
400566	289814
861960	100463
925029	182666
703266	177950
768921	231981
827268	312748
634372	26534.8
707539	311896
532797	51357.9
770125	201524
554850	32833.8
594059	25567.9
653433	281136
1.64546e+06	82018.7
822560	20598.8
604726	65697.8
602194	56810.3
2.15609e+06	45407.9
1.70513e+06	70291.1
680688	104322
769738	38022.6
540710	318799
458468	119294
720790	300391
1.81783e+06	77543.4
548152	279673
1.20094e+06	49702.9
1.46661e+06	160464
879188	31174.8
743226	232650
1.28494e+06	29967.8
738784	223711
584346	26843.5
1.50847e+06	44418.9
1.34911e+06	36549.5
1.34659e+06	233216
1.08503e+06	82355.5
1.08503e+06	280719
1.08503e+06	12903.7
1.20435e+06	34359.7
1.07661e+06	13363.1
23205.9	97097.4
1.1605e+06	10723.3
1.02103e+06	19561.4
716846	160755
1.45897e+06	442304
1.17765e+06	310839
662858	187396
648412	419719
1.78916e+06	130415
852330	251315
762412	234350
640822	41072.6
554430	221626
2099899	86438.2
936810	121998
871981	355945
1.82515e+06	93366.9
1.98416e+06
1.25149e+06	199956
878599	54122.9
785332	14161.1
1.32914e+06	418034
384318	199173
255507	91619.1
820863	34327.4
942825	109796
810163	179823
549875	73983.1
1.46755e+06	15145.4
724094	132624
1.44936e+06	24370
398391	23658.6
802954	135388
699035	12815.3
1.94191e+06	70273.4
2.13279e+06	111047
975440	282072
905207	52968.5
834566	104415
794328	44064.8
599959	38054.2
574984	86577.3
1.57126e+06	93342.7
889912	31725.3
945114	32090.5
953143	51394.2
902430	25395.9
689436	66551.7
276444	45076.9
219709	15004.1
1.25064e+06	110559
1128643	47276.8
1.01506e+06	164768
996742	26940.4
986775	12432.8
600500	379812
533068	124441
835982	51589
806789	314666
669497	33988.3
640333	355945
1.13166e+06	77838.1
1.27962e+06	54521.6
823322	106494
810677	262711
310784	195663
291028	187862
1.46965e+06	46401.2
799797	50554.6
791038	75536.2
1.31875e+06	82815.2
1.06811e+06	30048.6
1.11151e+06	64571.3
576676	14493.3
552460	287225
838236	27273.9
1.41442e+06	77551.5
1.09838e+06	55043.3
860119	50202.1
853932	52560.8
2.26728e+06	41157.3
1.74836e+06	128811
873685	14788.9
1.00205e+06	326530
715555	178217
679494	124925
821789	41019.5
446225	29677.2
514105	316290
817373	274393
825827	79981.5
944323	31392.8
1.14044e+06	96594.2
579848	17518.9
772322	84128.5
935709	77535.3
585390	51131.8
573039	114063
660754	23089.5
356000	50796.8
1.25517e+06	45815.6
769198	29903.9
677510	76477.7
370828	20666.2
803647	50371.6
340694	102012
1.47096e+06	16727.7
1551797	46810.8
644152	43619.1
1.15383e+06	25456.8
674291	50522.3
1.35648e+06	44888.4
602547	47561
988025	41570.7
605800	18496.2
551528	48122.7
935387	134606
317696	173155
1.52959e+06	156483
1249151	279770
1.16864e+06	242027
1.09317e+06	270155
1.07579e+06	244737
940657	241154
855631	83784
818211	251383
1.23409e+06	100185
341810	118315
1.52468e+06	283439
452340	179589
1120223	273472
791990	113833
916019	96576.6
638954	185192
692948	58918.4
651131	29995.2
1.16047e+06	106492
541812	245823
911143	61975.5
1.19367e+06	59833.8
907932	291000
474821	191035
1.32306e+06	226482
1.32671e+06	133951
1.07752e+06	94445.6
525691	170661
757429	191532
478699	293805
1.1344e+06	122023
652857	259009
1.54404e+06	202485
920223	185418
1.23583e+06	131658
577277	208903
464690	260806
1.27593e+06	28717.8
309390	330535
747507	69555.7
551449	206203
1.1571e+06	32933.8
775051	158821
1.37208e+06	170578
1.23073e+06	272419
1.02702e+06	164203
1.24981e+06	18423.1
234306	240292
1.07122e+06	136030
647948	90055.1
1.9939e+06	47630.7
973555	346083
843656	35894.2
1.08087e+06	30625.5
1.38249e+06	99888.2
822053	38845.9
1262227	14302.4
895099	241154
1.19923e+06	27311.7
733580	21257.4
707111	97215.8
1.02395e+06	172915
896658	281000
1.28752e+06	143800
1.17754e+06	190126
1.02638e+06	161876
499162	198608
1.32318e+06	284454
1.05849e+06	211765
1.31934e+06	515827
1.05651e+06	346959
1.20737e+06	293481
524911	83283.5
1.24334e+06	35565.3
1.13234e+06	67015.3
1.00946e+06	318422
848247	109041
535604	219188
2.12248e+06	183965
1.14793e+06	17979.1
1.18146e+06	181526
977576	69123
1.29643e+06	104912
1.16688e+06	67782.9
1.19042e+06	74822.7
1.11645e+06	131403
1.37017e+06	181381
1.28935e+06	266094
972012	142095
983388	300849
668870	360769
558897	66612.2
1.22958e+06	111927
1.16244e+06	354063
519690	278825
439765	206182
45546.4	285530
1266426	94529.5
390809	277741
365740	87956.3
1.29074e+06	267079
1109240	330173
613216	247955
565271	497760
1.27817e+06	13241.3
1.33893e+06	13445.3
1.26884e+06	515428
781329	194613
704639	235484
774619	61243.5
715121	75549.3
710852	122754
692768	37811
1847421	58660.1
1145335	54582.5
1.16352e+06	126774
1.24985e+06	88763.9
1.14146e+06	92936.9
573896	246621
548867	45363
614705	139384
624890	63310.3
1016920	101186
1.60038e+06	170878
1.53192e+06	32099.2
1.00789e+06	53808.1
925776	64424.4
1.77866e+06	200139
836976	241399
1.26925e+06	34881.3
638632	63019.7
1.08762e+06	229922
1.6151e+06	18412.5
896236	173268
1319187	245079
923549	62002.4
488848	285530
1.11574e+06	60207.7
1.03877e+06	288173
1279192	243934
817513	174923
1.03529e+06	298319
991526	141784
852673	96023
832694	298711
1.75145e+06	139383
1.68093e+06	55015
875150	177849
699518	41593.3
1.21947e+06	56787.1
564304	59285.5
1.13516e+06	83614.5
663210	26743.5
945700	470230
873082	92545.9
942811	16400
746155	257443
644316	34069
590993	152624
1.76699e+06	189211
1.1296e+06	136300
651018	39163.2
943796	89651.6
909001	217461
974591	46308.1
828142	48265.8
752808	248247
668687	30347.3
701364	27560.8
615023	467988
1092437	208239
770191	19133.6
1.87559e+06	21818.2
1.05906e+06	75369
1441899	122779
641745	98122.1
521502	19262.7
603217	29473.5
1.12071e+06	28091.1
1.14868e+06	45331.8
1.07333e+06	73340.4
1.18334e+06	27343.4
1.05595e+06	22863.4
1.4737e+06	300286
889282	262874
1.20921e+06	20344.5
773191	18579.6
1.19273e+06	21587.8
1.14579e+06	63504
1248966	64955.6
1.21842e+06	10439.4
702606	246395
598778	127347
1.19346e+06	17858
768653	55818.3
821037	171624
973269	106431
966211	31986.2
890049	90338.6
807709	42601.8
1.10586e+06	115710
1.07019e+06	24339.5
688422	178600
612221	111861
1.38509e+06	141182
1296948	68101
887471	41593.3
866584	105836
949519	172906
990208	163698
1.0235e+06	218120
945993	119674
3.42585e+06	71423.3
311698	273987
290612	157557
2.46702e+06	151254
1.49248e+06	36646.3
956141	69406.2
929820	44468.4
1.30476e+06	25680.3
1207658	65342.7
981696	176691
813568	24187.4
1.41633e+06	63617.1
2388805	210201
2.09373e+06	185499
691276	16501.7
626509	12884.9
2203604	51170
1462472	57356.3
1.47269e+06	104530
1.09546e+06	110603
2.39555e+06	50046
1.43908e+06	69571.1
2.35196e+06	37806.9
2395201	161473
1.118e+06	23980.2
958485	46406.3
615954	22426.1
649112	34698.8
1.44372e+06	101732
1.05991e+06	123472
881844	154579
909561	16322.7
972429	52266.1
672884	29047.5
584060	18239.5
586104	119151
559558	51100.5
1.42951e+06	97310.7
1.34761e+06	115132
976349	41835.5
887344	86496.6
885605	23926.6
1.81894e+06	73377.6
1.6366e+06	29144.4
1.12981e+06	82674.6
1.09577e+06	63513.5
2.35573e+06	40767.3
786375	17518.9
1.68999e+06	81443.4
1.31869e+06	63330.5
1.97581e+06	65187.3
1.90375e+06	29525.7
1.83895e+06	140191
976695	160001
948284	189165
672445	217181
554492	57614.6
677579	472485
507190	372652
1.03079e+06	162618
893925	140773
283708	258811
245420	546590
861882	121073
822170	250153
845830	453161
810406	760210
719584	395564
724131	297286
1167786	304045
1.1314e+06	370685
732574	399883
693307	44004.5
666764	367379
558977	132024
199800	21119.6
191075	322800
1.16586e+06	83231
852930	439124
278284	273461
237458	107321
841606	355159
701194	242876
556043	209843
479196	114678
1.03006e+06	101190
1.02753e+06	435119
301320	135079
216225	290552
1294175	227264
1.22478e+06	337084
456700	207274
440104
441638	41706.3
425519	116557
1.15581e+06	96618.9
613570	38895.8
619745	33560.4
1.03926e+06	65406.3
951351	40998
1.05691e+06	203076
965605	34681.4
996761	426367
790294	218402
1.54903e+06	254890
893584	257161
879742	39935.6
911185	109384
781939	50205.8
478206	168046
476117	203660
951314	28207.9
918500	146187
417050	32551.3
360461	58185.4
1.23824e+06	145460
1.22465e+06	94425.9
657194	56490
513761	36577.8
955560	12763.2
937115	39510.4
627117	226383
520965	489922
1318563	121073
1.22238e+06	117840
746985	300082
573815	289315
754048	102607
1173741	14928
1.10823e+06	334585
1.15808e+06	54376.4
1.10737e+06	261634
528861	43782.2
427259	17971
1.10214e+06	27287.5
750677	185851
947190	39304.5
970987	210001
750677	227039
533892	101129
426233	189663
1.05022e+06	22122.8
1.00512e+06	68772.5
1.04484e+06	108617
589993	24436.1
667957	86690.4
713340	26512.5
1260347	80572.9
1.23093e+06	18084
786442	296122
708299	225448
1.00161e+06	281320
863806	283901
804018	173539
700459	143213
1104831	148828
1.02977e+06	145859
1.18431e+06	117259
1.16552e+06	168377
622912	119536
553837	135598
1.14533e+06	184338
1.00077e+06	54453.9
843325	337989
1272961	51443.9
1.61089e+06	17066.8
900910	94908.9
939879	74895.4
1.39273e+06	211301
637543	70656.9
1433766	53167.1
832777	327925
766577	303409
657967	177291
1.79055e+06	201512
1327274	270017
1.78169e+06	87659.2
768898	103144
765126	63411.9
714653	507339
711297	89241.5
820491	214906
667615	412910
1.23304e+06	95103.7
928394	57947.2
686250	259860
1.12927e+06	645692
499807	319777
667171	379694
970430	443200
1.01716e+06	337094
1.20007e+06	110535
1.141e+06	451536
1.06209e+06	626040
1.81274e+06	210333
388617	109515
344327	224105
1.13066e+06	45305.7
1.19905e+06	152969
1.46687e+06	215975
1309955	238346
504636	283901
1.08768e+06	21544.3
1.36203e+06	21779.1
1.30706e+06	103854
968237	101852
920936	51865.6
1.29613e+06	337989
693624	10850.4
1.12156e+06	71507.3
1058761	200309
595223	61392.9
572880	48470.4
1.36769e+06	24239.9
1.00645e+06	154760
947576	87659.2
1.19955e+06	96010.6
1.14131e+06	374428
825041	74612.8
812528	150915
732311	361737
700118	41819.3
1139928	33330.3
1.07784e+06	239630
948982	356635
1.04414e+06	209433
1.00823e+06	163397
837978	145757
737580	21478.8
1.07212e+06	232731
1.27899e+06	42988.4
759813	227294
1.2316e+06	28437.2
1386856	141863
550942	53773.9
893780	19309.9
1533126	234482
826231	85996.1
749408	87630.9
1.43385e+06	38367.7
1.42499e+06	163186
935332	239309
898615	51426.5
845720	202289
2.05125e+06	116074
1.24258e+06	201952
1.25863e+06	31655.8
1.29439e+06	32648.2
1.92333e+06	157306
1.26394e+06	122494
804912	355800
756846	67528.6
697606	14523.8
553923	120249
559286	240879
1.41168e+06	211989
1720148	208656
482871	327519
2.13996e+06	508162
1.17922e+06	268960
1.07473e+06	31707.9
1.02343e+06	38093.6
1.00677e+06	37072.3
910208	212187
2.1589e+06	185771
714835	460246
739777	59151.3
999633	232921
1.12415e+06	389854
587925	136118
567194	153093
712879	65615.5
1.45739e+06	305247
1.08846e+06	109819
1.04616e+06	64311.4
890142	181757
424915	203234
1.07871e+06	350467
1.05008e+06	169554
717142	79321.1
697810	67413.3
868128	281029
807362	138032
869344	53926.1
1297159	152545
1.31273e+06	493525
1.23082e+06	761765
1.17843e+06	194629
1.07878e+06	713766
978781	220368
2.07332e+06	58813.5
1.84232e+06	82617.7
2393720	133059
1.99563e+06	158974
1.1393e+06	184546
1.31477e+06	40645.6
1210271	143683
943327	34607.5
873739	168004
549348	177367
379920	58792
1.05396e+06	142384
1.01857e+06	107616
1.21932e+06	103927
249522	286180
779808	88262.4
866869	146688
879721	83529.7
790287	135667
724339	55438.9
993265	134351
689530	96959.5
628011	27959.6
1.15298e+06	41395.5
1.17523e+06	309147
1.77603e+06	137035
1.24634e+06	26355.1
884897	127330
811980	129202
1.03997e+06	179371
1.02423e+06	28934.5
566875	34276.6
507630	69405
478745	50160.6
432005	39975.6
603764	256432
572765	125196
451672	42791.4
441546	152545
1.04013e+06	161012
1.00374e+06	93762.5
1.0045e+06	18640.5
951531	85673.1
913618	291928
1.04728e+06	25882.8
397743	38561.8
308275	75484.7
746392	224278
1.07214e+06	237527
832125	42110
1.02829e+06	36361.8
701842	67413.3
1.49355e+06	207782
858578	243820
1.1761e+06	298666
763579	166471
1.28943e+06	208019
1.54405e+06	191657
780139	38767.7
1.1418e+06	278341
1192737	47422.2
837829	270562
780915	30238.6
1.0678e+06	26004.5
1.28393e+06	22300.8
1104897	14749.8
1.30551e+06	298693
1.29777e+06	11550.3
1.42685e+06	182245
1.76308e+06	14449.8
1618570	132752
961754	254985
779539	34472.7
719538	198924
1.30955e+06	231149
1.2989e+06	278337
2.03201e+06	279172
891758	77238.6
835486	98138.2
976451	371030
783479	148305
1126626	207962
961575	366368
1169500	103851
1.21146e+06	477428
1.02231e+06	161188
1.02555e+06	425243
1.32603e+06	166692
1.44264e+06	92147.9
948870	455040
1.27997e+06	290712
1.25929e+06	249108
1.3938e+06	272549
567527	274644
1.22984e+06	197851
1.31617e+06	205593
1.07177e+06	392258
877472	27908.5
1.10264e+06	340135
895186	38699
1.40948e+06	397774
1.15651e+06	216353
1.12185e+06	149468
457279	287221
351454	102363
1.08055e+06	145309
730213	42069.6
912234	38063.4
750348	92069.1
706643	20396.3
637067	20986.4
1.20016e+06	224125
1.03898e+06	39480.6
624906	103608
481145	81265.2
979516	21292.2
891422	21878.5
842435	272353
587511	256954
953967	42545.9
866613	72001.1
993109	135388
859482	272304
399757	15418.5
898154	21022.7
752347	36089.8
1.60391e+06	36216.5
1.1603e+06	245383
569214	17405.9
796840	40726.8
722466	434635
1.40475e+06	75710.8
1.27251e+06	43292.7
749270	58695.4
547660	75526.9
1.51556e+06	16749.5
1.14246e+06	51161.6
1.00796e+06	185248
1.87008e+06	59402.8
788381	33245.6
550953	14806.3
1.28373e+06	19860.2
817658	134080
731990	120502
1.0859e+06	292757
1.41083e+06	336194
1109203	416422
708770	212161
1.0374e+06	191894
899085	145594
1.10209e+06	384980
721444	173671
1.12354e+06	138983
688305	436428
1.14233e+06	75206.2
1.11503e+06	32823.2
601585	244732
1.4621e+06	123069
466585	506899
828798	513403
1.16202e+06	351048
732511	139025
628861	264102
506822	93096.5
508597	125474
1.2044e+06	21161.8
892208	96531.6
704870	396161
522529	282548
689789	108549
535275	327871
801846	348947
795891	207929
923204	167692
686281	75334.3
982429	321133
695645	134278
1.08885e+06	52500.2
470758	356504
684092	33068
366950	21511.1
965058	167507
950078	80165.1
830988	455964
432374	472753
767238	325592
746677	139025
782893	254488
582586	92732.9
765774	183124
984553	223685
1.25519e+06	76983.2
509171	158544
1.01015e+06	161513
1.40892e+06	158664
474194	110979
589290	178386
1.33959e+06	128660
930054	152475
921609	46559.8
638075	158720
629379	413633
1.31862e+06	371168
1.0734e+06	416548
808330	75520.8
2012971	317269
597834	483692
1.3738e+06	348708
820377	371648
819907	42832.5
647712	25648
1.61549e+06	287006
794297	481318
746892	92252.8
722768	345532
682444	330062
1.53556e+06	162391
1.35302e+06	383796
555305	190191
460778	162749
1.21456e+06	98192.4
1.11839e+06	391322
835902	180815
808018	334193
744436	438857
728855	396304
1.04954e+06	553223
922524	550998
917865	600317
1.86491e+06	195655
1.38179e+06	490265
927682	407580
835707	66846.4
2.98179e+06	200868
887517	252910
1444130	491646
940426	424410
865124	510888
867180	274931
778053	588616
785837	546228
702641	68597.6
1.13414e+06	65542.5
701513	53763.5
736448	322386
682049	577313
871515	483338
778030	440061
761432	392113
893956	170868
2.02827e+06	330104
1.95859e+06	96788.5
874804	391180
837596	205004
768567	282043
1.37591e+06	180121
1.32931e+06	125664
1.21306e+06	468631
1.1679e+06	403869
864362	62099.3
820967	79776.4
1.00005e+06	106825
1099284	24235.8
1.0807e+06	87655.1
1.56778e+06	39881.8
1.46526e+06	149024
857916	362585
770301	125835
1080302	80562.3
844737	310724
769136	254571
1.13041e+06	349870
636273	67891.9
1.04483e+06	342463
1.06635e+06	166952
554470	52056.2
1145002	216912
1278214	408272
1.15765e+06	235027
403939	398290
372187	48677.6
1.01407e+06	568703
1.11411e+06	528772
831517	60892.4
1.12893e+06	49798.9
628784	286200
574558	20405.4
1.28771e+06	338454
869363	120381
648887	80538.6
642910	391019
1.06126e+06	253649
993514	458642
616276	304002
1338710	66044.4
889527	64053
763447	14015.1
1.52169e+06	48029.1
1489511	230319
1.38535e+06	127907
1.22197e+06	199907
1.25529e+06	110064
1.14254e+06	305191
1.09583e+06	34876.4
959299	305740
1.29257e+06	26565.6
1.16794e+06	13563
1.33088e+06	78488
746013	88684.5
632454	162673
1405127	380132
855895	339754
842753	19666.4
1.12524e+06	304384
1.34836e+06	307670
1.58508e+06	54994.9
841358	356414
796649	109102
1113211	253676
1.06816e+06	35260.3
822855	45566.6
736206	138355
1.01723e+06	87174.8
752409	174959
760786	75605.2
1.5426e+06	141774
1.02429e+06	181963
975880	84898.1
968651	307348
567643	332976
472645	18731.8
1.09522e+06	156077
	187219
	143330

## Sheet: Fig1-supp1 E
Survival fractions presented in Figure 1—figure supplement 1E
						0 Gy			2 Gy			5 Gy
					WT	1	1	1	0.278871	0.229926	0.179113	0.163512	0.119918	0.15507916
					Tert-/-	1	1	1	0.697659	0.537584	0.529096	0.405274	0.551816	0.399071

## Sheet: Fig1-supp1 F-H
GFP % values of the histogram presented in Figure 1—figure supplement 1F-G
		Pluripotent
		genotype		WT			Tert-/-
		Biological replicate		n=1	n=2	n=3	n=1	n=2	n=3
		Experimental conditions	0 Gy	97.5	97.1	97.3	98.5	98.7	98.4
			2 Gy	94.6	93.7	94.8	97.3	97.3	97.5
			5 Gy	94.2	93	93.5	96.3	97.2	97.3
		6DA
		genotype		WT									Tert-/-
		Biological replicate		n=1			n=2			n=3			n=1			n=2			n=3
		technical replicate		1	2	3	1	2	3	1	2	3	1	2	3	1	2	3	1	2	3
		Experimental conditions	0 Gy	2.55	2.28	2.38	2.67	1.98	2.5	2.61	2.78	2.47	13	13.1	11.4	13.3	11.3	11.5	13	12.7	15.2
			2 Gy	3.75	3.78	4.18	2.48	2.43	3.22	2.45	3.74	3.5	23.8	25.5	25.3	26.7	20.5	22	22.9	23.5	21.3
			5 Gy	2.88	3.02	3.45	2.3	2.09	4.18	2.25	2.91	4.4	25.2	28.9	20.6	20.5	20.8	21.7	22.9	22	24.9
		6DA + 6DL
		genotype		WT									Tert-/-
		Biological replicate		n=1			n=2			n=3			n=1			n=2			n=3
		technical replicate		1	2	3	1	2	3	1	2	3	1	2	3	1	2	3	1	2	3
		Experimental conditions	0 Gy	1.46	2.37	2.58	0.4	0.81	1.15	2.81	2.79	2.26	26.9	21.8	26.8	38.4	46.9	40.6	46.6	42.5	21.7
			2 Gy	0.4	9.29	14.9	0.29	0.62	1.07	1.52	0.42	0.86	80.5	66.2	64	78.9	71.3	78	46.1	78.3	68
			5 Gy	0.47	0.48	0.34	0.38	0.47	0.28	3.49	0.66	3.85	54.5	39.6	31.2	21.8	50.9	29.5	52.5	27.9	49.7
			% of GFP positive cells after FACS analysis. Cells were first gated according to SSC-A/FSC-A. Doublets were then excluded (SSC-H/SSC-W and FSC-H/FSC-W) and GFP positive cells were gated. Values were analyzed and extracted with FlowJo
