# Supplementary material for: Telomere dysfunction cooperates with epigenetic alterations to impair murine embryonic stem cell fate commitment
Source: eLife. 2020 Apr 16;9:e47333. doi: 10.7554/eLife.47333 (PMC7192583; doi:10.7554/eLife.47333)
Supplement: Figure 2—source data 1. — Source data of (i) the GFP percentage values represented in the histogram in Figure 2B and Figure 2—figure supplement 1E; (ii) Fold change values presented in Figure 2—figure supplement 1B; (iii) Raw data from the western blot quantification presented in Figure 2—figure supplement 1D,F; (iv) Raw Ct values and information relative to the Qiagen qPCR array relative to Figure 2D and Figure 2—figure supplement 1G,H. [file elife-47333-fig2-data1.xlsx]

## Sheet: Fig. 2B
GFP % values of the histogram presented Figure 2B
	% of GFP positive cells after FACS analysis. Cells were first gated according to SSC-A/FSC-A. Doublets were then excluded (SSC-H/SSC-W and FSC-H/FSC-W) and GFP positives cells were gated. Values were analyzed and extracted with FlowJo
	Upper panel
	Genotype and treatment	Biological replicates	Technical replicates	WT DMSO	Tert -/- DMSO	WT UNC2400	Tert -/- UNC2400	WT UNC1999	Tert -/- UNC1999	WT GSK343	Tert -/- GSK343
	GFP %	n=1	1	3.47	32.6	2	44.8	1.56	45.8	1.93	53.8
			2	0.94	37.3	1.68	38.8	1.24	40.8	1.31	62
			3	2.19	37.1	1.83	45	1.21	49	1.25	50
		n=2	1	0.82	30.1	0.92	17.4	0.87	44.9	0.32	43.8
			2	1.22	21.7	0.69	21.3	0.61	40.2	0.4	36.5
			3	0.61	17.6	0.57	19.6	0.56	46.9	0.52	36.8
		n=2	1	1.94	34.6	1.29	33.8	0.62	46.5	1.43	57.3
			2	1.7	24.4	1.35	35.9	0.61	40.2	1.31	48.7
	lower panel
	Genotype and treatment	Biological replicates	Technical replicates	WT DMSO	Tert -/- DMSO	WT A395	Tert -/- A395	WT A395N	Tert -/- A395N
	GFP %	n=1	1	3.47	32.6	1.42	70.6	2.06	40.5
			2	0.94	37.3	2.02	61.5	2.93	42
			3	2.19	37.1	2.4	59.7	2.02	41.7
		n=2	1	0.82	30.1	1.33	36.7	0.97	25.6
			2	1.22	21.7	1.22	38.2	1.48	18.4
			3	0.61	17.6	0.92	46.5	1.95	19.9
		n=2	1	1.94	34.6	2.01	49.3	1.69	22.8
			2	1.7	24.4	2.26	54.2	1.39	17.1

## Sheet: Fig.2-supp1 B
Fold change values presented Figure 2—figure supplement 1B
	Gene name	WT undifferentiated			Tert -/- undifferentiated				Gene name	WT 6DA			Tert -/- 6DA
		n=1	n=2	n=3	n=1	n=2	n=3			n=1	n=2	n=3
	Ezh2	1	1	1	0.7344	0.6453	0.2638		Ezh2	1	1	1	1.04	0.3892	0.96
	Suz12	1	1	1	0.5541	0.7997	0.3173		Suz12	1	1	1	1.3134	0.8619	1.3751
	Eed	1	1	1	0.6423	0.9867	0.3125		Eed	1	1	1	1.428	0.8794	0.9821
	Gene name	WT 6DA + 6DL			Tert -/- 6DA + 6DAL, SL, GFP +			Tert -/- 6DA + 6DAL, SL, GFP -
		n=1	n=2	n=3	n=1	n=2	n=3	n=1	n=2	n=3
	Ezh2	1	1	1	2.7764	1.43	1.6016	0.8804	2.061	0.5075
	Suz12	1	1	1	2.2541	1.9106	2.3383	1.0027	3.152	0.8114
	Eed	1	1	1	3.8237	2.4324	2.553	1.3665	3.4298	0.8712

## Sheet: Fig.2-supp1 E
GFP % values of the histogram presented Figure 2—figure supplement 1E
	% of GFP positive cells after FACS analysis. Cells were first gated according to SSC-A/FSC-A. Doublets were then excluded (SSC-H/SSC-W and FSC-H/FSC-W) and GFP positives cells were gated. Values were analyzed and extracted with FlowJo
	Pluripotent panel
	Genotype and treatment	Biological replicates	Technical replicates	WT DMSO	Tert -/- DMSO	WT UNC2400	Tert -/- UNC2400	WT UNC1999	Tert -/- UNC1999	WT GSK343	Tert -/- GSK343	WT A395	Tert -/- A395N	WT A395N	Tert -/- A395N
	GFP %	n=1	1	97.4	97.4	97.1	97.8	97.2	97.5	97.1	97.4	97.5	97.8	97.3	98.0
			2	96.9	96.9	97.4	97.4	97.1	97.6	96.9	97.6	97.5	97.7	97.3	97.8
			3	97.0	97.4	97.4	97.4	97.4	97.5	97.1	97.4	97.6	97.8	97.4	97.8
		n=2	1	97.2	93.5	97	93.7	97	92.4	97.2	91.7	97.4	93.3	96.8	95.2
			2	96.8	92.8	97	93.7	97	95.3	97	93.4	97.8	94.9	97.2	94.9
			3	97.0	94.9	97.2	93.1	97.1	94.5	97	94.6	97.4	93.0	97	98.3
		n=2	1	97.2	98.2	97.2	98.2	97.1	98.2	97.2	98.4	97.1	98.4	96.9	98.3
			2	97	98.3	97.3	98.3	96.8	98.3	97.1	98.3	97.2	98.2	96.8	98.3
	6DA panel
	Genotype and treatment	Biological replicates	Technical replicates	WT DMSO	Tert -/- DMSO	WT UNC2400	Tert -/- UNC2400	WT UNC1999	Tert -/- UNC1999	WT GSK343	Tert -/- GSK343	WT A395	Tert -/- A395N	WT A395N	Tert -/- A395N
	GFP %	n=1	1	1.44	19.6	1.91	13.3	1.48	20.1	1.70	15.6	2.03	14.6	1.98	22.8
			2	1.63	18.8	1.59	16.0	1.77	23.3	1.98	14.3	1.88	14.6	2.19	20.6
			3	1.23	21.0	1.75	12.4	2.05	16.4	1.92	11.3	1.92	13.1	1.91	20.2
		n=2	1	1.17	12.9	0.90	12.0	0.85	15.9	0.92	11.1	1.33	13.2	1.26	20.7
			2	1.05	17.6	0.85	13.1	0.90	16.0	0.59	13.8	1.48	12.4	1.22	17.2
			3	1.23	16.5	0.84	11.8	0.83	16.9	0.99	14.4	1.11	14.4	1.35	19.1
		n=2	1	1.94	26.7	1.22	17.6	1.68	27.3	1.52	20	1.76	20	2.05	28.3
			2	2.11	24.4	1.23	18.1	1.59	28.3	1.5	19.5	2	20.9	1.96	26

## Sheet: Fig.2-supp1 D,F
	Raw data from the western blot quantification Figure 2—figure supplement 1 D, F
	Quantification within each lane was carried out using ImageJ. A single region of interest (ROI) was defined for each lane, plotted as a two-dimensional graph of the pixel intensity along the ROI, and the area of each peak calculated. The values indicate the area of each peak and its percentage value (%) of the total peak area. Zero value = no peak detected.
			Western blot H3K27me3/H3 Figure 2_figure supplement 1 B left panel									Western blot H3K27me3/H3 Figure 2_figure supplement 1 B right panel
			Biological replicate		1		2		3			Biological replicate		1		2		3
			Protein	Sample name	Peak Area	Percent*	Peak Area	Percent*	Peak Area	Percent*		Protein	Sample name	Peak Area	Percent*	Peak Area	Percent*	Peak Area	Percent*
			H3	WT DMSO	31590.2	11.29	32319.3	9.592	19276.6	13.779		H3	WT DMSO	3982.93	2.605	34111.5	17.593	56442.8	19.016
				WT GSK343	33132	11.841	31233	9.269	17499.4	12.509			WT A395	14269.3	9.332	30477.1	15.719	54053.1	18.211
				WT UNC1999	40717.3	14.552	25753.3	7.643	18984.7	13.57			WT A395N	29507.7	19.297	19382.6	9.997	22193.3	7.477
				WT UNC 2400	39686.1	14.183	52216.2	15.497	24786.3	17.717			Tert -/- DMSO	9650.44	6.311	9878.95	5.095	16798.4	5.659
				Tert -/- DMSO	30603.3	10.937	40885.2	12.134	15521.4	11.095			Tert -/- A395	9167.32	5.995	15161.8	7.82	17180.2	5.788
				Tert -/- GSK343	26506.4	9.473	57408.1	17.038	13586.3	9.711			Tert -/- A395N	18205.3	11.906	16151.5	8.33	28525.2	9.61
				Tert -/- UNC1999	25406.5	9.08	54827.2	16.272	16761.8	11.981
				Tert -/- UNC2400	19356.6	6.918	42304.3	12.555	13483.2	9.638
			H3K27me3	WT DMSO	513.577	1.215	882.355	1.795	1894.26	7.497		H3K27me3	WT DMSO		0		0	4883.47	2.115
				WT GSK343	NA	0	NA	0	NA	0			WT A395		0		0		0
				WT UNC1999	NA	0	NA	0	NA	0			WT A395N	2666.96	2.772		0	3307.18	1.432
				WT UNC 2400	1569.79	3.712	5915.63	12.036	2213.08	8.759			Tert -/- DMSO	35217.3	36.598	21606.2	34.236	47049.7	20.378
				Tert -/- DMSO	21453.9	50.737	22028	44.819	21160.5	83.745			Tert -/- A395		0		0		0
				Tert -/- GSK343	NA	0	NA	0	NA	0			Tert -/- A395N		0	9061.46	14.358	42887.6	18.575
				Tert -/- UNC1999	NA	0	NA	0	NA	0
				Tert -/- UNC2400	18747.6	44.336	20322.8	41.349		0
			Western blot Nanog/Hsp90ab1 Figure 2_figure supplement 1 C left panel									Western blot Nanog/Hsp90ab1 Figure 2_figure supplement 1 C right panel
			Biological replicate		1		2		3			Biological replicate		1		2		3
			Protein	Sample name	Peak Area	Percent*	Peak Area	Percent*	Peak Area	Percent*		Protein	Sample name	Peak Area	Percent*	Peak Area	Percent*	Peak Area	Percent*
			hsp90ab1	WT DMSO	16114.5	11.227	15968.2	10.465	33398.6	19.676		hsp90ab1	WT DMSO	18994.5	13.469	34051.7	16.579	9061.96	9.453
				WT GSK343	14730.1	10.262	17630.1	11.555	21002.8	12.373			WT A395	20685.1	14.668	29880.9	14.548	11465.2	11.96
				WT UNC1999	18038.8	12.567	19804.3	12.979	16285.8	9.595			WT A395N	21646	15.349	20457.6	9.96	9807.33	10.23
				WT UNC 2400	20273.3	14.124	19767.6	12.955	8566.4	5.047			Tert -/- DMSO	13148	9.323	12113.8	5.898	7746.89	8.081
				Tert -/- DMSO	11365.2	7.918	11864.9	7.776	5848.84	3.446			Tert -/- A395	8806.88	6.245	16263.2	7.918	10766.6	11.231
				Tert -/- GSK343	14464.8	10.077	11122.3	7.289	11409.2	6.722			Tert -/- A395N	13524.7	9.59	21580.3	10.507	7346.38	7.663
				Tert -/- UNC1999	14388.3	10.024	15121.2	9.91	10151.9	5.981
				Tert -/- UNC2400	11504.2	8.015	14822	9.714	11143.6	6.565
			Nanog	WT DMSO	NA	0	NA	0	NA	0		Nanog	WT DMSO	NA	0	NA	0	NA	0
				WT GSK343	NA	0	NA	0	NA	0			WT A395	NA	0	NA	0	NA	0
				WT UNC1999	NA	0	NA	0	NA	0			WT A395N	NA	0	NA	0	NA	0
				WT UNC 2400	NA	0	NA	0	NA	0			Tert -/- DMSO	27213.9	12.131	17561.8	13.896	12708.2	12.701
				Tert -/- DMSO	NA	0	NA	0	NA	0			Tert -/- A395	85279.2	38.015	47849.8	37.862	39008.6	38.985
				Tert -/- GSK343	9261.69	6.452	10327.5	6.769	5109.2	3.01			Tert -/- A395N	53618.9	23.901	36687.8	29.03	27718.7	27.702
				Tert -/- UNC1999	13397.8	9.334	13373.7	8.765	26935.5	15.869
				Tert -/- UNC2400	NA	0	2779.55	1.822	19888.8	11.717

## Sheet: Fig.2D;Fig.2-supp1 G, H(1)
Raw CT values of Data presented as histogram/Heatmap/PCA in Figure 2D and Figure 2—figure supplement 1G, H
Biological replicate		n=1	n=2	n=3	n=1	n=2	n=3	n=1	n=2	n=3	n=1	n=2	n=3	n=1	n=2	n=3
Well	Gene name	Tert -/- DMSO-1	Tert -/- DMSO-2	Tert -/- DMSO-3	Tert -/- GSK343-1	Tert -/- GSK343-2	Tert -/- GSK343-3	Tert -/- UNC1999-1	Tert -/- UNC1999-2	Tert -/- UNC1999-3	Tert -/- UNC2400-1	Tert -/- UNC2400-2	Tert -/- UNC2400-3	Tert -/- DMSO-1	Tert -/- DMSO-2	Tert -/- DMSO-3
A1	Alb	28.9761	29.6421	27.945	30.6582	29.3709	29.361	28.5416	29.2562	30.7639	29.2972	29.7118	30.3247	28.7155	29.3347	29.5395
A2	Apoh	31.1546	31.4158	31.3642	32.8252	32.2076	31.6807	32.8235	31.7305	31.3185	30.7345	31.3507	31.7354	34.0022	32.2035	30.989
A3	Aqp1	26.7277	25.8187	25.4951	27.5111	25.6275	25.5768	26.1335	25.3673	25.729	27.5807	26.95	27.7861	30.6686	29.5061	29.9092
A4	Bmp4	23.2632	22.8514	22.1931	22.2314	21.6577	21.808	21.6841	21.5112	21.6505	22.487	21.9456	22.3736	21.636	21.8764	21.8604
A5	Ccr5	Undetermined	34.341	Undetermined	Undetermined	34.4274	Undetermined	37.8823	Undetermined	Undetermined	Undetermined	Undetermined	Undetermined	34.8936	Undetermined	Undetermined
A6	Cd34	29.9826	30.4729	29.2044	30.7082	29.5248	29.6074	28.8672	28.6978	28.9462	29.669	29.264	29.2508	26.6173	26.7455	27.0031
A7	Cd3e	28.89	28.8742	28.2772	28.9021	27.9922	28.5241	27.455	27.4484	27.4841	28.485	27.9675	28.3058	Undetermined	Undetermined	Undetermined
A8	Cd79a	29.5429	28.7888	28.5644	28.7974	27.694	27.5103	27.5206	27.3538	27.9641	29.1861	28.4337	28.7875	28.8958	28.5692	28.2426
A9	Chat	31.7896	33.8032	30.6895	Undetermined	33.161	31.8679	33.6473	33.7331	32.0048	31.7102	31.3866	33.5341	Undetermined	Undetermined	Undetermined
A10	Col10a1	28.7471	29.0113	28.5261	29.9953	28.4845	28.7687	28.4588	28.5161	28.5638	29.4046	29.175	29.5613	30.1822	30.1818	29.7704
A11	Comp	32.3473	31.2176	32.2984	34.404	32.8947	34.422	32.8072	31.6522	33.4775	32.3137	31.0017	32.1602	31.8114	32.2796	30.9473
A12	Cpa1	Undetermined	39.8906	38.0949	34.7317	34.6115	34.4034	Undetermined	34.7105	34.6794	34.737	34.6479	33.9854	34.4818	Undetermined	31.7102
B1	Ctsk	29.2322	28.6847	28.9032	29.8799	29.0022	29.2573	28.8093	28.3791	29.4468	28.9743	28.8785	29.9477	28.1726	27.6016	27.5028
B2	Dcn	25.8508	26.3902	25.3378	26.6629	25.7732	25.5414	25.5188	25.3509	26.148	26.1966	26.5633	27.3737	19.2746	19.4994	19.5675
B3	Dcx	Undetermined	33.9457	Undetermined	Undetermined	Undetermined	Undetermined	Undetermined	Undetermined	Undetermined	Undetermined	33.9456	Undetermined	31.1719	31.3208	31.0042
B4	Dnmt3b	24.0112	23.5229	23.2152	24.8793	23.4762	23.4563	23.3413	22.9395	22.944	23.7284	22.9266	23.2303	27.6255	27.3976	27.4494
B5	Dpp4	25.5755	24.8517	24.6088	25.2691	24.561	24.5322	24.2932	23.8123	24.2383	25.2996	24.9511	25.5438	24.4713	24.4073	24.3833
B6	Eno1	19.3881	18.6826	18.3063	19.6103	18.2202	18.3144	18.0005	17.7507	17.7085	18.8408	18.0074	18.5051	19.3095	19.6287	19.5173
B7	Fabp7	31.5717	31.5614	31.3544	33.9673	30.6116	30.9782	30.5662	30.7061	31.8937	30.8551	33.688	33.9577	27.6942	26.921	27.4152
B8	Fgf5	28.9662	28.5706	28.2884	29.7139	28.8776	29.8098	28.6508	28.2273	27.6649	27.6999	28.024	27.9112	27.6908	28.3822	28.3371
B9	Foxa1	30.9369	30.8398	31.2341	33.2584	30.849	30.6795	30.4972	30.009	30.9404	31.6847	29.8364	30.6754	28.1952	28.3381	27.7387
B10	Foxd3	29.2219	28.2414	27.2044	28.6303	26.9276	26.4551	27.2559	26.2581	26.7645	28.7286	27.3934	27.2414	36.4132	36.014	35.1947
B11	Foxg1	30.5216	28.5761	29.1581	31.5706	32.1776	30.6061	30.4018	29.3739	30.4178	29.2484	28.6282	29.7446	23.383	23.6324	23.7107
B12	G6pc	33.2797	36.2666	33.9644	36.7211	33.5581	35	37.2364	33.5396	33.3875	32.4873	33.406	35.8656	34.7245	35.3285	33.8153
C1	Gad1	31.8932	30.5766	30.8149	30.7933	29.6586	30.2471	29.3963	29.3453	29.5681	34.6556	30.7558	30.8569	33.1786	32.7945	36.7961
C2	Gad2	31.721	32.2552	33.6218	33.4931	30.8898	31.7815	31.4928	31.735	31.9808	31.9472	30.6987	31.6939	33.3924	33.379	34.9128
C3	Galc	24.6612	23.9929	23.8906	24.6992	24.1856	24.2227	23.8331	23.6629	23.9743	24.6126	23.9274	24.8331	24.4463	24.5971	24.5109
C4	Gata1	31.2525	32.5688	31.8017	32.1743	30.7898	30.9784	30.873	31.5628	30.2109	32.5491	31.8289	31.5155	36.2691	37.5695	32.4374
C5	Gata2	28.6222	28.1712	27.943	28.6634	27.8547	27.5708	27.4441	27.725	27.6391	27.9383	27.5211	27.5623	25.8447	26.1721	25.972
C6	Gata6	20.9529	20.4346	20.1671	22.6608	21.8524	21.5935	21.5537	21.2593	21.7939	21.2208	20.7852	21.8241	21.0183	21.2417	21.2469
C7	Gbx2	25.8914	25.5785	24.8181	24.9856	23.8772	24.1713	24.0187	23.7637	23.929	25.3157	24.6188	24.8893	27.2403	27.3152	27.4236
C8	Gdf3	25.8424	25.0132	24.5623	24.8579	23.6519	23.8996	23.6531	23.4568	23.7136	25.6613	24.2724	24.6992	Undetermined	Undetermined	35.3205
C9	Gfap	30.7843	32.619	30.8033	32.2991	32.1547	30.705	31.3502	30.4873	31.1732	30.8454	30.3961	31.3531	30.367	29.2862	29.6761
C10	Hand1	28.692	28.6193	28.2824	27.9146	27.0069	27.2737	26.7235	26.5096	27.2565	28.7508	27.6384	27.9933	32.7526	32.2996	31.2456
C11	Hand2	35.3592	31.5466	32.2871	34.9716	32.7554	32.6554	32.4702	32.6126	31.6306	33.8189	31.9968	32.8797	24.8134	24.8583	24.6696
C12	Hes5	38.0317	34.947	37.7956	38.1745	38.0484	36.2069	36.3313	Undetermined	36.7766	37.7367	35.6251	34.3122	36.9973	37.5559	38.6645
D1	Hnf4a	27.2511	27.2596	26.5364	28.158	27.4524	27.3752	26.6632	26.6228	26.7935	27.2864	26.9639	27.6369	31.3422	30.2268	30.2067
D2	Ibsp	35.5422	34.584	Undetermined	34.5591	32.8665	32.2741	30.6096	32.5292	33.2135	33.6243	33.143	Undetermined	Undetermined	Undetermined	34.5699
D3	Igf2	23.59	23.6906	23.5449	24.3048	22.6733	22.4075	22.1989	22.1452	22.7654	24.5055	23.3153	23.7997	16.9804	17.171	17.0011
D4	Ins2	34.8505	35.4213	32.9715	33.6993	34.58	35.5885	37.8262	33.2005	36.0195	32.3041	31.813	33.9857	33.8979	32.7037	34.3889
D5	Itgb4	25.9197	25.4812	25.4275	26.4832	25.3606	25.185	25.1579	24.8354	25.2599	25.7564	24.9256	25.61	27.0013	27.2141	27.3263
D6	Krt10	27.468	27.1591	26.7772	27.5184	26.8298	27.4522	26.7734	26.6445	27.2551	27.1714	26.8745	27.4647	25.8517	25.7702	25.8215
D7	Krt14	28.8577	27.9899	28.7947	29.4412	28.725	28.1932	27.9347	27.4005	28.5166	27.7318	26.0172	27.9086	27.6119	27.6916	27.9233
D8	Krt19	21.3239	20.6049	20.451	21.6647	20.736	20.8546	20.6302	20.3756	21.0148	20.8938	20.5919	21.4889	22.3172	22.459	22.5221
D9	Lefty1	23.3639	22.9786	22.2393	21.6112	21.5692	21.9306	21.6836	21.56	21.3862	22.2981	22.1891	22.4111	25.5043	26.0255	25.9383
D10	Map3k12	25.748	25.2768	24.61	26.3158	25.4499	25.6108	24.8372	24.9781	25.5557	25.5315	25.1642	25.8357	23.4944	23.5139	22.6515
D11	Miox	32.6539	32.4551	36.7797	32.7544	32.2768	33.9877	34.5416	31.5282	32.7138	34.2539	34.4473	33.5823	31.9244	31.8701	31.5036
D12	Mixl1	30.7602	29.6042	28.6364	29.5848	30.1779	30.4156	29.8136	29.3479	29.1735	29.4132	28.7936	28.7758	29.8675	29.9306	29.6662
E1	Msln	26.3706	25.77	26.1967	26.6182	25.2545	24.8743	24.8257	24.6026	25.1557	26.2883	25.1644	25.8947	27.3187	26.9298	27.1331
E2	Myh1	38.9614	36.9544	Undetermined	Undetermined	38.2343	35.5965	38.4045	Undetermined	38.9575	39.2319	38.7115	Undetermined	32.7235	34.7941	33.4901
E3	Myh11	31.3077	30.2383	30.6586	33.9763	31.2771	29.9424	30.4778	30.3151	30.7173	29.9698	30.802	30.8033	23.2332	23.5033	23.5091
E4	Myh7	26.1538	25.6106	25.3492	27.8317	26.8879	27.6286	26.3714	26.2561	27.0015	26.4149	26.2599	26.9821	31.7531	31.4466	31.1629
E5	Myl3	25.184	24.7773	24.2174	26.2303	25.9863	26.1867	25.3401	25.4047	26.8307	25.7945	26.3831	27.3184	27.2069	26.6213	26.8442
E6	Nanog	23.4153	22.7897	22.011	22.1861	21.4606	21.5167	21.4364	20.9397	21.3413	22.66	21.7337	22.201	29.4129	30.1883	29.3059
E7	Neurod1	31.4642	30.3263	29.9546	30.7862	31.1408	31.2007	29.6289	29.7668	29.6448	30.2564	29.588	30.5613	31.5111	31.4998	31.7941
E8	Neurog2	Undetermined	Undetermined	Undetermined	Undetermined	Undetermined	Undetermined	35.5957	Undetermined	34.836	34.9506	35.2793	Undetermined	33.2077	Undetermined	33.7012
E9	Nkx2-2	35.7145	33.8829	32.2728	Undetermined	Undetermined	35.8393	Undetermined	Undetermined	Undetermined	34.3609	33.7936	32.7407	Undetermined	Undetermined	35.236
E10	Nppa	28.7506	28.9125	28.3992	29.3059	28.1559	28.1989	27.8434	28.3008	28.4334	28.7675	28.3611	28.7632	28.6606	27.9468	28.3571
E11	Olig2	36.2916	33.8178	35.0154	38.2503	36.8341	33.7774	36.9146	39.885	34.514	33.6081	32.5082	34.1348	39.0947	37.5824	Undetermined
E12	Otx2	26.2424	25.7851	25.4023	25.4176	24.6267	24.7729	24.2797	24.3251	24.3035	25.5351	25.2911	25.5634	38.654	38.3389	Undetermined
F1	Pdgfra	21.8553	21.2553	21.1683	23.8816	22.7462	22.5568	22.3787	22.0043	22.5963	22.2112	21.661	22.6229	21.7631	21.735	21.7133
F2	Podxl	22.295	21.5101	21.5178	23.247	21.8153	21.6552	21.6572	21.1518	21.7791	22.7041	21.9376	22.7084	22.9241	22.7406	22.7443
F3	Pou4f2	27.1498	26.6816	25.9475	26.147	25.4481	25.3419	25.4595	25.2522	25.2571	26.3611	25.6591	25.8543	33.9875	33.8469	34.2416
F4	Pou5f1	20.6359	20.3397	19.6519	19.9432	19.2485	19.3661	19.1921	19.2	18.9351	19.9797	19.439	19.6061	28.714	29.7342	28.2867
F5	Prom1	27.7062	27.3622	26.8739	27.7419	26.9123	27.4443	26.2351	26.2956	26.3493	27.424	26.8041	27.0218	27.2935	27.2828	27.4693
F6	Ptcra	32.0057	31.4036	32.3059	32.2488	31.166	30.7611	31.936	32.2075	31.0218	32.95	31.7481	33.7702	32.5304	30.0091	32.2235
F7	Rcvrn	30.7289	29.0303	32.6521	32.2954	29.6744	28.3754	30.7169	32.5455	29.6267	30.8477	30.1814	31.7837	30.9303	28.5	30.4497
F8	Runx1	23.8098	23.4539	23.1855	24.9032	24.2572	23.9791	23.682	23.5545	24.3371	23.5533	23.3166	24.194	22.9895	23.3008	23.0135
F9	Ryr2	25.5691	24.9664	25.1649	26.8317	26.1713	26.0175	25.4918	25.5619	26.3121	26.2383	25.6262	26.6165	26.9999	27.1481	26.7589
F10	Sftpb	32.3803	31.6644	30.3307	31.9039	30.5343	30.7766	30.2997	31.4424	29.1767	31.8683	31.8172	31.6641	29.9125	29.5491	29.2247
F11	Sftpd	30.5123	29.8007	29.8438	31.9615	30.0045	30.8042	30.7038	30.3129	30.3365	29.9059	30.3655	29.881	33.2161	32.443	33.2743
F12	Slc17a6	Undetermined	Undetermined	33.5632	33.8671	Undetermined	31.7341	33.9321	32.5448	33.5696	33.5924	Undetermined	32.2978	Undetermined	Undetermined	33.5519
G1	Slc17a7	30.2652	30.2957	29.9431	31.8646	30.9457	29.9937	30.4077	30.5513	30.5677	31.1696	29.6701	30.7423	26.8722	26.8119	27.0038
G2	Slc2a2	30.6576	31.1842	29.799	31.4899	30.6504	31.2186	30.6123	31.2294	32.2999	30.3861	30.1612	31.314	31.1977	31.3608	30.809
G3	Slc32a1	Undetermined	33.604	32.2807	Undetermined	32.6025	33.3657	31.8004	32.4191	33.183	30.9191	31.7859	31.7125	Undetermined	36.2507	34.464
G4	Smtn	25.5468	24.752	24.5531	26.816	25.6936	25.3052	25.1652	24.9652	25.4512	25.9573	24.9093	25.6841	24.2907	24.2374	24.0018
G5	Sox17	24.1841	23.3014	23.2603	26.5974	24.443	23.8334	24.4955	23.8965	24.572	24.969	23.6597	24.3097	29.5333	29.2353	29.3487
G6	Sox2	22.9713	22.6818	21.9691	22.8417	21.5394	21.3172	21.3718	21.0212	21.1563	22.7566	21.8075	21.8389	26.9221	26.5283	26.3509
G7	Sox7	23.3233	22.798	22.3417	25.3929	24.2831	23.7884	23.605	23.4647	23.9419	23.4838	22.8917	23.6902	30.4289	30.7517	32.0102
G8	T	30.9169	30.3841	30.3992	31.3216	31.4868	31.5105	30.3221	29.943	29.306	29.4603	28.458	28.5589	33.3992	39.2339	Undetermined
G9	Tat	31.6521	33.5282	32.8852	33.4748	33.027	31.6325	31.8786	32.7606	33.7906	32.7047	31.5761	34.2322	32.6598	32.8319	34.8907
G10	Tyr	37.5539	33.6097	Undetermined	34.6509	39.3595	38.3758	39.0062	Undetermined	39.3482	37.5319	37.7147	34.2647	Undetermined	Undetermined	Undetermined
G11	Zfp42	21.9254	21.2744	20.7843	20.7758	19.899	20.2353	19.9634	19.692	19.9531	20.9631	20.2807	20.8639	27.9592	28.1484	27.8327
G12	Zic1	27.6684	26.9842	26.359	30.8439	29.4405	29.2494	28.994	28.9719	29.9074	27.9991	27.7235	28.4797	22.5854	22.5784	22.5818
H1	Actb	16.6424	16.1521	15.7341	17.1461	16.2898	16.3019	15.9951	15.841	16.2267	16.3699	15.8596	16.5695	15.5602	15.8403	15.8124
H2	B2m	19.9236	19.548	19.1729	19.8393	19.7023	19.9734	19.3731	19.3506	20.0055	19.3706	19.486	20.5731	18.407	18.8701	18.9387
H3	Gapdh	18.8899	18.2926	17.7016	18.4163	17.5648	17.6388	17.3724	17.1584	17.3709	18.3853	17.67	18.1595	17.7933	18.2095	18.2684
H4	Gusb	23.6857	22.9412	22.5787	23.836	23.4259	23.4381	23.0003	22.747	23.3154	23.4606	22.9347	23.7811	23.4993	23.5802	23.5448
H5	Hsp90ab1	18.259	17.7878	17.3161	17.8169	17.2364	17.3722	16.9415	16.7852	16.982	17.6775	17.2878	17.5949	17.6347	17.8157	17.8152
H6	MGDC (Mouse Genomic DNA contamination	37.4702	39.4925	Undetermined	Undetermined	39.0845	38.3923	Undetermined	39.6976	39.3593	38.5593	39.1371	Undetermined	Undetermined	Undetermined	Undetermined
H7	Reverse transcription control	19.8514	19.8387	19.8728	19.8068	19.8426	19.8558	19.824	19.9783	19.8676	19.678	19.801	19.9979	20.3687	20.2833	20.2126
H8	Reverse transcription control	19.8178	19.8439	19.8533	19.8147	19.8068	19.8292	19.8034	21.1973	19.8446	19.656	19.7407	20.2011	20.3461	20.2938	20.1565
H9	Reverse transcription control	19.8635	19.8639	19.928	19.8454	19.8824	19.8622	19.8315	19.9634	19.8944	19.695	19.7862	19.991	20.3762	20.2781	20.2384
H10	Positive PCR Control	17.9104	17.8803	17.8068	18.3981	17.7812	17.776	17.8821	18.4187	19.9569	17.9468	17.8445	18.1571	17.7737	17.6013	17.6516
H11	Positive PCR Control	17.9192	17.9149	17.8145	17.7404	17.9308	17.7176	17.9276	18.4448	17.9204	17.9208	18.4495	17.8749	17.8936	17.5652	17.6275
H12	Positive PCR Control	18.4392	18.1887	18.2997	18.7135	18.3568	18.4104	18.5124	19.002	18.5842	18.5616	19.9782	18.5686	18.2413	17.8939	17.9036
*undetermined = insufficient signal at conclusion of PCR amplification to be assigned a signal
Two genes, Dnmt3b and Podxl, were excluded from the PCA/heatmap analysis: Qiagen incorrectly assigned Podxl as a murine pluripotency marker, and the Dnmt3b array primers are not specific to active isoforms (our own unpublished data).

## Sheet: Fig.2D;Fig.2-supp1 G, H2)
Raw CT values of Data presented as histogram/Heatmap/PCA in Figure 2D and Figure 2—figure supplement 1G, H
Biological replicate		n=1	n=2	n=3	n=1	n=2	n=3	n=1	n=2	n=3	n=1	n=2	n=3
Well	Gene name	WT DMSO-1	WT DMSO-2	WT DMSO-3	Tert -/- DMSO-1	Tert -/- DMSO-2	Tert -/- DMSO-3	Tert -/- A395-1	Tert -/- A395-2	Tert -/- A395-3	Tert -/- A395N-1	Tert -/- A395N-2	Tert -/- A395N-3
A1	Alb	30.2655	32.636	34.2146	30.507	34.2986	31.8383	28.1591	27.7232	31.9801	32.53	31.4013	29.7647
A2	Apoh	31.9898	31.9703	Undetermined	31.1597	32.3616	32.6781	32.199	33.5807	32.3688	32.2455	31.8145	30.5201
A3	Aqp1	28.3974	28.6227	29.3673	29.0186	28.5878	28.7194	26.7793	26.592	27.8527	29.3569	27.98	27.5645
A4	Bmp4	22.1576	21.3753	22.5858	22.7145	22.7047	23.0204	21.3636	22.4913	21.4604	22.2082	21.7942	21.9149
A5	Ccr5	Undetermined	35.6801	Undetermined	Undetermined	Undetermined	Undetermined	Undetermined	Undetermined	Undetermined	Undetermined	Undetermined	34.1473
A6	Cd34	27.6782	27.7075	28.8511	28.2622	28.3611	28.7167	28.2755	28.4182	27.7279	27.8579	27.0052	26.9095
A7	Cd3e	Undetermined	Undetermined	Undetermined	27.8915	27.9948	28.3876	26.8448	27.8667	26.7373	27.6731	27.019	27.2166
A8	Cd79a	29.3898	28.3068	28.4437	29.7023	29.6551	29.4259	28.8646	29.4004	28.4055	29.3911	28.335	28.9216
A9	Chat	33.4542	37.7387	Undetermined	32.6303	33.8343	Undetermined	33.4185	33.6323	32.5264	33.4523	31.9594	32.1897
A10	Col10a1	29.6923	28.9045	28.9533	29.6763	28.3855	28.8457	28.1792	28.6156	28.3169	29.4661	28.659	28.3641
A11	Comp	32.8144	31.006	32.7881	31.8884	32.5603	31.9538	32.7429	31.8233	31.5785	31.9569	31.8628	30.8907
A12	Cpa1	34.9633	33.4603	33.3006	33.5863	34.6306	Undetermined	36.4104	Undetermined	34.8597	Undetermined	34.7218	33.4828
B1	Ctsk	28.3017	27.6031	27.7633	29.5295	29.7077	30.6513	29.669	29.854	29.6349	29.6741	29.1586	29.6244
B2	Dcn	21.79	20.3447	20.6911	24.569	27.3891	26.5586	25.7623	24.9872	27.6275	25.21	25.3949	23.6717
B3	Dcx	27.6634	28.1772	27.7458	33.9869	Undetermined	Undetermined	34.4946	Undetermined	Undetermined	34.8424	33.9347	32.9775
B4	Dnmt3b	27.5718	26.9644	27.5676	23.7218	23.7938	23.7914	22.7537	23.6178	22.6539	23.1647	22.5847	22.6112
B5	Dpp4	25.6728	25.2373	25.2428	25.7634	25.8267	25.9134	24.467	25.1524	24.6058	25.4085	24.8647	24.7043
B6	Eno1	19.2441	18.506	19.608	18.8478	18.7219	18.9867	18.2027	18.7079	17.7404	18.691	18.1675	18.0209
B7	Fabp7	25.5	24.9078	25.3176	30.5379	32.1512	31.5891	31.5354	31.2135	31.7169	31.0171	30.7365	30.4844
B8	Fgf5	27.3127	26.0276	27.1968	29.2314	28.8553	28.6659	28.2711	28.3576	28.6459	28.2601	27.5401	27.6153
B9	Foxa1	28.9281	27.414	28.7071	31.0003	30.9508	30.4847	29.9688	29.9765	30.2967	31.5303	29.9321	30.1348
B10	Foxd3	36.4758	36.0254	Undetermined	27.8772	27.7746	27.7107	26.8803	26.863	25.9366	27.1722	27.1447	26.8251
B11	Foxg1	24.2659	23.0004	23.515	25.9233	26.4592	26.8176	26.7313	27.5664	27.5428	26.4214	25.7894	25.6512
B12	G6pc	36.832	33.3815	36.2594	37.3475	37.2612	34.7767	35.3554	37.9575	33.491	33.3622	34.5592	33.5533
C1	Gad1	32.5605	30.854	32.4108	33.3356	33.4342	33.5411	29.9975	31.5246	31.9827	38.0052	30.6999	32.3182
C2	Gad2	29.7139	30.5664	31.3205	33.4925	32.4639	33.2689	32.8669	32.868	33.666	35.5841	33.2063	31.9225
C3	Galc	25.2364	24.3317	24.9507	24.8996	25.3593	25.469	24.5664	25.1824	24.7301	24.8825	24.4933	24.4795
C4	Gata1	33.5169	39.0476	34.6125	31.5201	33.5149	32.1568	31.3549	31.4537	31.1806	30.8691	30.7062	33.7008
C5	Gata2	26.215	25.3709	25.9853	26.4908	26.419	27.1868	26.5216	26.7476	26.8728	26.5699	25.9583	25.7444
C6	Gata6	22.5546	20.9406	21.4552	21.9226	22.4554	22.544	22.6831	22.5126	23.4461	22.42	21.7681	21.5428
C7	Gbx2	28.226	27.3459	27.3516	24.9799	24.5981	24.8484	23.3817	24.6801	23.2378	24.2657	23.6141	23.9572
C8	Gdf3	33.1649	37.4315	Undetermined	25.6535	25.3652	25.7635	23.8765	24.8738	23.4101	24.8069	24.3653	24.6228
C9	Gfap	27.942	26.9386	26.6971	30.6605	31.6684	32.2821	29.2939	30.7621	29.8412	29.6941	30.4268	30.2508
C10	Hand1	28.7507	29.5123	30.0155	29.8923	30.3021	30.5166	27.683	28.4501	27.396	29.8914	28.6068	29.2012
C11	Hand2	26.1888	24.7833	25.8105	28.6099	28.8331	29.5572	30.9477	30.5326	30.3918	29.9516	29.1611	27.9652
C12	Hes5	36.5116	34.6265	36.2955	Undetermined	39.001	37.6452	38.8957	37.3697	36.3858	36.8006	34.695	35.6696
D1	Hnf4a	32.2372	31.2784	33.5203	27.8152	28.1944	28.3787	26.8932	27.4533	28.3872	27.8401	27.208	27.0107
D2	Ibsp	32.869	33.4021	33.7483	32.9609	Undetermined	Undetermined	30.9776	31.5637	33.5634	32.9119	38.791	33.5351
D3	Igf2	16.8748	16.2004	16.5161	22.3624	23.3378	23.5013	22.7457	21.2188	23.5585	22.9452	22.5534	20.9813
D4	Ins2	32.2602	33.3099	30.9974	32.3931	Undetermined	33.9571	33.8596	Undetermined	32.3069	32.8686	33.0148	37.984
D5	Itgb4	27.4786	26.7921	27.3823	25.5507	25.6078	25.8853	24.8501	25.2885	25.1862	25.535	24.9286	24.9325
D6	Krt10	26.2773	25.6294	26.0103	27.1662	27.5649	27.9082	26.6077	27.674	27.3441	27.3003	27.1976	26.6741
D7	Krt14	28.9416	27.6097	28.2086	26.7907	26.975	27.342	28.1516	27.4738	29.175	27.6454	26.6116	26.8964
D8	Krt19	23.8736	22.5219	23.2327	22.2315	22.42	22.5731	21.866	21.5944	22.8372	22.5965	21.9226	21.8463
D9	Lefty1	26.6051	25.7024	26.5139	22.6416	22.5401	22.9086	20.4072	22.6484	21.3073	21.4575	21.4003	21.7677
D10	Map3k12	23.672	22.8733	23.6201	25.6956	25.9986	25.6653	25.013	25.7077	24.9586	25.377	24.6516	24.6829
D11	Miox	33.6804	32.7811	33.1469	33.7037	32.9561	33.5843	31.6828	33.7998	31.7159	32.5318	37.3067	35.893
D12	Mixl1	30.622	28.6995	30.363	29.7902	29.4726	30.2294	28.139	29.4177	28.3321	28.5814	27.6695	28.8719
E1	Msln	28.9971	27.5424	28.7415	26.7242	26.6635	27.2384	25.6892	25.2323	25.9327	27.1375	26.3122	25.8188
E2	Myh1	37.3833	38.1306	33.6857	Undetermined	Undetermined	39.3173	Undetermined	Undetermined	38.063	Undetermined	35.6489	34.6248
E3	Myh11	23.8456	22.6249	23.9321	21.8248	22.4558	23.0129	24.7255	25.9622	25.5315	22.6592	22.2349	21.4258
E4	Myh7	30.2262	31.3162	31.1598	26.9365	27.2243	27.3858	26.6206	27.1639	27.8067	27.4156	26.5801	26.5527
E5	Myl3	29.5808	29.0049	28.7682	27.7846	28.503	28.5577	27.4257	26.9128	28.9633	28.7256	27.6865	27.4796
E6	Nanog	30.294	29.866	30.6336	23.0193	23.1932	23.3168	21.2825	22.4309	20.9415	22.2497	21.8938	22.1904
E7	Neurod1	29.7187	29.611	31.2362	31.2811	31.004	30.9275	30.4535	30.917	30.3931	29.7863	29.5594	29.696
E8	Neurog2	30.3826	32.5572	32.1739	Undetermined	Undetermined	Undetermined	Undetermined	Undetermined	Undetermined	35.8876	Undetermined	34.7429
E9	Nkx2-2	38.6251	33.7808	Undetermined	35.1982	34.213	34.3989	37.9596	Undetermined	32.9715	Undetermined	34.2088	35.2348
E10	Nppa	28.2295	27.6562	27.7597	29.1854	29.0058	28.9492	28.2866	28.7122	28.1389	28.6413	27.5858	27.9413
E11	Olig2	36.9912	35.7209	36.828	35.4519	34.8122	34.7444	39.2534	Undetermined	35.3164	34.6352	32.0068	33.9296
E12	Otx2	39.8811	Undetermined	34.4337	27.5486	26.8525	26.6909	25.197	25.3496	25.2913	26.5485	25.9844	26.1577
F1	Pdgfra	21.2078	20.7539	21.3533	23.028	23.4056	23.5018	23.5624	23.2162	24.4224	23.6318	22.8419	22.518
F2	Podxl	23.4387	21.9243	22.6588	23.393	23.683	23.6443	23.2163	22.7347	23.5887	23.6822	22.9082	22.6592
F3	Pou4f2	32.6965	33.2192	33.8602	27.1377	26.581	26.8375	25.3687	26.2784	25.2635	26.0013	25.5923	25.9071
F4	Pou5f1	Undetermined	33.8137	34.1934	20.5033	19.9575	20.3132	18.7776	19.7054	18.7444	19.5262	19.2152	19.3263
F5	Prom1	25.7718	26.4462	26.9301	29.223	28.6261	29.4252	27.7685	27.6888	27.8662	28.3683	27.801	27.7194
F6	Ptcra	34.141	30.4667	33.7342	32.1434	33.5542	34.3949	31.6037	33.9012	31.8008	32.7862	31.6822	31.8358
F7	Rcvrn	29.9229	28.59	29.7881	32.8189	33.0011	33.72	32.9594	32.8734	28.88	32.7668	29.955	30.4936
F8	Runx1	23.8242	22.7228	22.9724	23.476	23.6962	23.9774	24.5348	24.3471	24.8297	23.6849	23.1901	22.9506
F9	Ryr2	27.6049	26.1863	26.5248	26.7022	27.5285	27.6492	26.896	26.6376	27.4594	27.6172	26.8574	26.6305
F10	Sftpb	30.1792	29.0272	29.807	31.3996	31.0202	31.1335	30.5527	29.9802	30.4845	29.4248	30.8808	29.9056
F11	Sftpd	Undetermined	34.5706	Undetermined	30.309	30.0248	30.3332	28.9903	29.9061	29.5538	29.5547	29.7593	30.3847
F12	Slc17a6	32.4862	30.6912	31.2516	Undetermined	33.5731	33.875	32.9411	33.2203	33.4331	33.4477	31.5253	33.8171
G1	Slc17a7	28.6679	27.3032	27.8633	30.1846	34.6286	29.746	29.4319	29.9626	29.6332	29.5742	29.4711	29.4047
G2	Slc2a2	31.3624	30.3959	31.4074	31.6099	31.9603	31.8177	32.8375	31.7645	31.9947	31.8243	31.1583	30.8564
G3	Slc32a1	Undetermined	32.7844	32.4797	31.9337	33.6837	32.6442	31.1994	33.5857	31.0011	31.6592	30.843	30.4776
G4	Smtn	24.9531	23.7326	24.5415	25.1894	25.019	25.5608	25.785	25.7504	25.5774	25.6161	24.8143	24.4504
G5	Sox17	30.7239	30.7574	32.3282	24.9314	25.2993	25.4033	26.0204	25.1947	26.5623	25.915	24.8656	24.7243
G6	Sox2	24.5994	25.3771	25.807	23.3521	22.6228	22.9142	21.5215	21.8573	21.1584	22.5285	21.8338	21.7711
G7	Sox7	29.6255	29.4576	33.5244	23.9136	24.2683	24.3746	24.5695	24.5727	24.7655	24.487	23.4993	24.5636
G8	T	33.6808	32.3808	33.7482	30.6978	30.7622	30.9642	28.5883	29.8878	28.7332	28.5506	27.4545	29.2988
G9	Tat	33.5283	31.8272	33.6171	31.8651	32.9045	33.7066	33.8694	33.5671	33.4015	33.9489	32.6635	34.3458
G10	Tyr	Undetermined	39.42	Undetermined	Undetermined	Undetermined	Undetermined	Undetermined	Undetermined	39.4369	35.552	Undetermined	39.4671
G11	Zfp42	28.8156	28.4015	29.354	21.6362	21.4417	21.805	19.6981	20.9757	19.4991	20.7419	20.4032	20.5834
G12	Zic1	23.1601	22.2829	22.6164	26.9338	27.4154	27.8674	27.3865	27.2925	28.2179	27.675	26.6714	26.3005
H1	Actb	15.6488	14.797	16.1549	16.1993	16.4479	17.1361	16.3263	16.8905	16.3539	16.4459	15.757	15.6919
H2	B2m	19.5184	18.5778	19.6085	19.8204	20.5231	21.1495	20.2605	20.7376	20.9064	20.316	19.6732	19.7089
H3	Gapdh	18.404	17.5292	18.6825	18.5664	18.654	18.8768	17.5939	18.3116	17.2175	18.3299	17.6074	17.664
H4	Gusb	24.5521	23.5258	24.2403	23.8695	24.3363	24.4615	23.4665	24.2091	23.7371	23.9714	23.4571	23.5095
H5	Hsp90ab1	18.015	17.2446	17.9901	18.1623	17.9308	18.3857	16.9695	17.7147	16.8293	17.7044	17.1414	17.2529
H6	MGDC (Mouse Genomic DNA contamination	Undetermined	37.6734	35.5717	Undetermined	Undetermined	Undetermined	Undetermined	Undetermined	39.6325	Undetermined	Undetermined	Undetermined
H7	Reverse transcription control	20.2598	19.5872	19.6996	20.2384	19.5007	19.7473	20.2333	19.6061	19.5511	20.3591	19.5766	19.6461
H8	Reverse transcription control	20.2832	19.5775	19.6769	20.2035	19.5019	19.7791	20.1708	19.5631	19.5345	20.3383	19.54	19.6278
H9	Reverse transcription control	20.28	28.1291	19.7333	20.2083	19.5226	19.7595	20.2038	19.6161	19.5695	20.3386	19.5963	19.6464
H10	Positive PCR Control	17.5121	17.4317	17.6549	17.9914	17.9989	17.7751	17.6932	17.8625	18.7762	17.873	17.4475	17.82
H11	Positive PCR Control	17.4589	17.4213	17.6288	18.0159	17.7675	18.863	17.6999	17.8604	17.4732	17.8721	17.471	17.711
H12	Positive PCR Control	17.8366	17.777	18.1702	18.3084	18.2263	18.2859	17.9899	18.5849	17.847	18.9346	17.8042	18.154
*undetermined = insufficient signal at conclusion of PCR amplification to be assigned a signal
Two genes, Dnmt3b and Podxl, were excluded from the PCA/heatmap analysis: Qiagen incorrectly assigned Podxl as a murine pluripotency marker, and the Dnmt3b array primers are not specific to active isoforms (our own unpublished data).
