# Supplementary material for: Telomere dysfunction cooperates with epigenetic alterations to impair murine embryonic stem cell fate commitment
Source: eLife. 2020 Apr 16;9:e47333. doi: 10.7554/eLife.47333 (PMC7192583; doi:10.7554/eLife.47333)
Supplement: Figure 3—source data 1. — Source data of (i) the GFP percentage values represented in the histogram in Figure 3C and Figure 3—figure supplement 1L; (ii) Raw Ct values and information relative to the Qiagen qPCR array relative to Figure 3E,F and Figure 3—figure supplement 1B,D,E; (iii) Raw data from the western blot quantification presented in Figure 3—figure supplement 1A,C,J,K; (iv) Fold change values presented in Figure 3—figure supplement 1A,B; (v) Indel frequency as showed in Figure 3—figure supplement 1I–L. [file elife-47333-fig3-data1.xlsx]

## Sheet: Figure 3D
GFP % values of the histogram presented in Figure 3C
	% of GFP positive cells after FACS analysis. Cells were first gated according to SSC-A/FSC-A. Doublets were then excluded (SSC-H/SSC-W and FSC-H/FSC-W) and GFP positives cells were gated. Values were analyzed and extracted with FlowJo.
	Genotype and treatment	Biological replicate	Technical replicate	WT DMSO	Tert -/- DMSO	WT GSK J4	Tert-/- GSK J4	WT GSK J5	Tert-/- GSK J5
	GFP %	n=1	1	0.36	70.6	0.74	19.4	0.24	60.1
			2	0.13	50.8	0.31	34.2	0.28	64.8
			3	0.12	62.1	0.89	34.3	0.32	44.1
		n=2	1	0.31	40.7	0.99	18	0.57	49.1
			2	0.57	39.7	0.42	19	0.96	30.7
			3	0.26	57.2	0.53	12.9	0.37	26.8
		n=3	1	0.36	70.6	0.74	19.4	0.24	60.1
			2	0.13	50.8	0.31	34.2	0.28	64.8
			3	0.12	62.1	0.89	34.3	0.32	44.1

## Sheet: Fig. 3D Fig. 3-supp1, E, F, G
Raw CT values of Data presented as histogram/Heatmap/PCA in Figure 3 E, F and Figure 3—figure supplement 1B, D, E
Biological replicate		n=1	n=2	n=3	n=1	n=2	n=3	n=1	n=2	n=3	n=1	n=2	n=3
Well	Gene name	WT DMSO-1	WT DMSO-2	WT DMSO-3	Tert-/- DMSO-1	Tert-/- DMSO-2	Tert-/- DMSO-3	Tert-/- GSKJ4-1	Tert-/- GSKJ4-2	Tert-/- GSKJ4-3	Tert-/- GSKJ5-1	Tert-/- GSKJ5-2	Tert-/- GSKJ5-3
A1	Alb	30.2655	32.636	34.2146	30.507	34.2986	31.8383	32.1684	31.4726	29.7481	29.9517	32.4613	31.6746
A2	Apoh	31.9898	31.9703	Undetermined	31.1597	32.3616	32.6781	31.2327	30.607	32.2091	31.3397	31.3694	31.8466
A3	Aqp1	28.3974	28.6227	29.3673	29.0186	28.5878	28.7194	26.9184	26.3767	26.8541	27.4885	27.5696	27.851
A4	Bmp4	22.1576	21.3753	22.5858	22.7145	22.7047	23.0204	22.6462	22.7051	23.5591	22.2028	21.636	22.2164
A5	Ccr5	Undetermined	35.6801	Undetermined	Undetermined	Undetermined	Undetermined	Undetermined	Undetermined	Undetermined	Undetermined	Undetermined	Undetermined
A6	Cd34	27.6782	27.7075	28.8511	28.2622	28.3611	28.7167	28.5757	29.3147	29.622	27.3841	26.4032	27.2167
A7	Cd3e	Undetermined	Undetermined	Undetermined	27.8915	27.9948	28.3876	27.951	28.604	28.7675	27.8801	27.0243	27.5113
A8	Cd79a	29.3898	28.3068	28.4437	29.7023	29.6551	29.4259	28.8696	28.7781	28.9414	28.6598	28.1437	29.0206
A9	Chat	33.4542	37.7387	Undetermined	32.6303	33.8343	Undetermined	32.4565	32.4707	Undetermined	32.4762	33.4708	32.8582
A10	Col10a1	29.6923	28.9045	28.9533	29.6763	28.3855	28.8457	28.3288	28.646	28.8075	28.8873	28.6038	29.3298
A11	Comp	32.8144	31.006	32.7881	31.8884	32.5603	31.9538	30.7162	30.7405	32.9782	31.7283	31.6047	32.2798
A12	Cpa1	34.9633	33.4603	33.3006	33.5863	34.6306	Undetermined	36.408	Undetermined	Undetermined	34.0309	Undetermined	33.6034
B1	Ctsk	28.3017	27.6031	27.7633	29.5295	29.7077	30.6513	28.8198	29.3562	29.2813	29.0028	29.1746	29.2052
B2	Dcn	21.79	20.3447	20.6911	24.569	27.3891	26.5586	27.1998	25.5223	25.2627	23.3504	24.2321	24.6788
B3	Dcx	27.6634	28.1772	27.7458	33.9869	Undetermined	Undetermined	Undetermined	33.9339	34.4211	32.8405	32.4595	Undetermined
B4	Dnmt3b	27.5718	26.9644	27.5676	23.7218	23.7938	23.7914	22.4707	22.9278	23.7618	23.2587	22.6718	22.9765
B5	Dpp4	25.6728	25.2373	25.2428	25.7634	25.8267	25.9134	24.7451	24.6727	25.3264	24.9289	24.6415	25.2495
B6	Eno1	19.2441	18.506	19.608	18.8478	18.7219	18.9867	17.8893	18.1803	19.1398	18.3572	17.7533	18.2668
B7	Fabp7	25.5	24.9078	25.3176	30.5379	32.1512	31.5891	33.4776	31.9112	32.5166	29.7167	31.2983	30.6578
B8	Fgf5	27.3127	26.0276	27.1968	29.2314	28.8553	28.6659	27.5572	27.803	28.862	27.6249	27.6333	28.2672
B9	Foxa1	28.9281	27.414	28.7071	31.0003	30.9508	30.4847	31.8629	30.2651	30.9008	30.5916	30.5822	30.8364
B10	Foxd3	36.4758	36.0254	Undetermined	27.8772	27.7746	27.7107	27.505	27.6256	28.7649	27.6646	26.9519	27.6135
B11	Foxg1	24.2659	23.0004	23.515	25.9233	26.4592	26.8176	26.94	26.589	27.9749	25.6883	25.533	25.8713
B12	G6pc	36.832	33.3815	36.2594	37.3475	37.2612	34.7767	32.8749	35.9685	36.4595	35.5779	38.4602	35.7355
C1	Gad1	32.5605	30.854	32.4108	33.3356	33.4342	33.5411	30.5373	30.9156	32.0191	31.2733	31.5229	31.0142
C2	Gad2	29.7139	30.5664	31.3205	33.4925	32.4639	33.2689	31.9324	32.6142	36.2181	32.2705	33.2714	Undetermined
C3	Galc	25.2364	24.3317	24.9507	24.8996	25.3593	25.469	24.3897	24.1978	24.7949	24.6207	24.2562	24.7063
C4	Gata1	33.5169	39.0476	34.6125	31.5201	33.5149	32.1568	34.8078	32.7296	33.3171	31.8182	32.1968	37.0024
C5	Gata2	26.215	25.3709	25.9853	26.4908	26.419	27.1868	26.5089	26.9651	27.7392	26.3062	25.8862	25.9961
C6	Gata6	22.5546	20.9406	21.4552	21.9226	22.4554	22.544	20.4108	20.386	20.6897	21.3195	21.4072	21.6476
C7	Gbx2	28.226	27.3459	27.3516	24.9799	24.5981	24.8484	24.918	24.9794	26.4075	24.5755	23.5399	24.3906
C8	Gdf3	33.1649	37.4315	Undetermined	25.6535	25.3652	25.7635	24.7409	25.2135	26.3317	24.9449	23.8994	24.4818
C9	Gfap	27.942	26.9386	26.6971	30.6605	31.6684	32.2821	30.4635	31.3965	31.3886	30.8882	30.1571	31.9996
C10	Hand1	28.7507	29.5123	30.0155	29.8923	30.3021	30.5166	27.909	28.5235	29.3867	28.8411	28.8949	28.7767
C11	Hand2	26.1888	24.7833	25.8105	28.6099	28.8331	29.5572	31.1639	29.99	30.6826	28.2935	28.6624	28.5827
C12	Hes5	36.5116	34.6265	36.2955	Undetermined	39.001	37.6452	33.189	35.4946	38.1022	35.7855	35.9987	35.6748
D1	Hnf4a	32.2372	31.2784	33.5203	27.8152	28.1944	28.3787	27.6166	26.8451	27.25	27.0053	26.9901	27.8779
D2	Ibsp	32.869	33.4021	33.7483	32.9609	Undetermined	Undetermined	32.855	32.5768	32.396	32.235	33.8056	34.2215
D3	Igf2	16.8748	16.2004	16.5161	22.3624	23.3378	23.5013	23.2972	22.5754	21.8607	20.7761	21.9122	22.2734
D4	Ins2	32.2602	33.3099	30.9974	32.3931	Undetermined	33.9571	35.6192	Undetermined	36.4635	32.7754	32.8329	33.8624
D5	Itgb4	27.4786	26.7921	27.3823	25.5507	25.6078	25.8853	25.3129	25.4389	25.652	25.2111	25.3595	25.4614
D6	Krt10	26.2773	25.6294	26.0103	27.1662	27.5649	27.9082	26.635	26.5374	27.4403	26.7997	26.6499	27.2551
D7	Krt14	28.9416	27.6097	28.2086	26.7907	26.975	27.342	26.6132	26.8696	27.8177	27.1973	27.224	26.9093
D8	Krt19	23.8736	22.5219	23.2327	22.2315	22.42	22.5731	20.9348	20.8431	21.2247	21.5026	21.678	21.908
D9	Lefty1	26.6051	25.7024	26.5139	22.6416	22.5401	22.9086	22.4484	22.6277	23.8177	21.9754	20.9807	21.9836
D10	Map3k12	23.672	22.8733	23.6201	25.6956	25.9986	25.6653	24.6222	24.7518	25.469	24.9967	24.6861	24.8375
D11	Miox	33.6804	32.7811	33.1469	33.7037	32.9561	33.5843	32.7371	34.3957	34.4518	33.7628	33.3553	32.9573
D12	Mixl1	30.622	28.6995	30.363	29.7902	29.4726	30.2294	29.1417	28.8622	30.7372	29.3356	28.2401	29.3778
E1	Msln	28.9971	27.5424	28.7415	26.7242	26.6635	27.2384	26.3412	26.2486	26.6627	26.3576	26.5936	26.3637
E2	Myh1	37.3833	38.1306	33.6857	Undetermined	Undetermined	39.3173	35.5467	Undetermined	Undetermined	35.544	Undetermined	Undetermined
E3	Myh11	23.8456	22.6249	23.9321	21.8248	22.4558	23.0129	26.3945	25.5113	26.2331	22.2372	22.2316	22.3119
E4	Myh7	30.2262	31.3162	31.1598	26.9365	27.2243	27.3858	25.3974	25.1646	25.335	26.6249	26.4899	26.8896
E5	Myl3	29.5808	29.0049	28.7682	27.7846	28.503	28.5577	26.6456	26.0158	25.745	26.3851	27.3623	26.734
E6	Nanog	30.294	29.866	30.6336	23.0193	23.1932	23.3168	22.7081	22.722	23.7443	22.4145	21.5731	22.1877
E7	Neurod1	29.7187	29.611	31.2362	31.2811	31.004	30.9275	29.8089	30.2197	31.1845	29.9298	29.8668	29.5592
E8	Neurog2	30.3826	32.5572	32.1739	Undetermined	Undetermined	Undetermined	37.5331	Undetermined	Undetermined	Undetermined	34.5659	34.7413
E9	Nkx2-2	38.6251	33.7808	Undetermined	35.1982	34.213	34.3989	35.4979	32.5462	33.3992	33.3995	34.6579	35.2896
E10	Nppa	28.2295	27.6562	27.7597	29.1854	29.0058	28.9492	28.3407	28.2584	29.3459	28.4654	27.7809	28.6228
E11	Olig2	36.9912	35.7209	36.828	35.4519	34.8122	34.7444	33.322	32.5419	35.7974	33.2279	33.7506	32.5293
E12	Otx2	39.8811	Undetermined	34.4337	27.5486	26.8525	26.6909	25.7925	25.8241	26.6576	25.7639	25.9148	25.8174
F1	Pdgfra	21.2078	20.7539	21.3533	23.028	23.4056	23.5018	21.4491	21.4057	21.6415	22.3856	22.5343	22.6644
F2	Podxl	23.4387	21.9243	22.6588	23.393	23.683	23.6443	21.6883	21.7256	21.9717	22.6733	22.7291	23.0134
F3	Pou4f2	32.6965	33.2192	33.8602	27.1377	26.581	26.8375	26.2404	26.4602	27.9427	26.604	25.7117	26.4056
F4	Pou5f1	Undetermined	33.8137	34.1934	20.5033	19.9575	20.3132	19.8774	20.0032	20.9633	19.8315	18.8866	19.7008
F5	Prom1	25.7718	26.4462	26.9301	29.223	28.6261	29.4252	27.6762	27.3582	28.4273	27.6812	27.5105	27.6536
F6	Ptcra	34.141	30.4667	33.7342	32.1434	33.5542	34.3949	29.9423	34.8325	37.277	30.7063	32.3115	32.6659
F7	Rcvrn	29.9229	28.59	29.7881	32.8189	33.0011	33.72	27.9675	31.8665	32.5758	29.504	32.137	31.5252
F8	Runx1	23.8242	22.7228	22.9724	23.476	23.6962	23.9774	22.9716	22.9136	23.6659	23.28	23.0161	23.3745
F9	Ryr2	27.6049	26.1863	26.5248	26.7022	27.5285	27.6492	25.3715	25.4461	25.576	26.3583	26.7278	26.775
F10	Sftpb	30.1792	29.0272	29.807	31.3996	31.0202	31.1335	30.6934	31.3014	30.7916	30.3339	30.982	31.6135
F11	Sftpd	Undetermined	34.5706	Undetermined	30.309	30.0248	30.3332	30.3852	30.6962	30.9917	29.5082	29.9114	30.2759
F12	Slc17a6	32.4862	30.6912	31.2516	Undetermined	33.5731	33.875	31.366	33.4862	Undetermined	31.8909	32.5575	32.4143
G1	Slc17a7	28.6679	27.3032	27.8633	30.1846	34.6286	29.746	29.5638	29.8541	30.9392	30.8799	29.3027	30.7067
G2	Slc2a2	31.3624	30.3959	31.4074	31.6099	31.9603	31.8177	30.4899	30.253	31.8593	36.0111	31.255	32.5104
G3	Slc32a1	Undetermined	32.7844	32.4797	31.9337	33.6837	32.6442	30.7369	33.5053	34.8497	32.1538	30.2669	32.2013
G4	Smtn	24.9531	23.7326	24.5415	25.1894	25.019	25.5608	24.3787	24.4738	24.9915	24.9333	24.862	24.8984
G5	Sox17	30.7239	30.7574	32.3282	24.9314	25.2993	25.4033	22.9113	23.5252	23.491	24.5071	24.8295	24.4864
G6	Sox2	24.5994	25.3771	25.807	23.3521	22.6228	22.9142	22.4888	22.6534	23.6034	22.457	21.8413	22.3672
G7	Sox7	29.6255	29.4576	33.5244	23.9136	24.2683	24.3746	21.966	22.3433	22.8519	23.4098	23.3624	23.6115
G8	T	33.6808	32.3808	33.7482	30.6978	30.7622	30.9642	28.5738	29.2799	30.3553	29.1796	28.4326	29.2376
G9	Tat	33.5283	31.8272	33.6171	31.8651	32.9045	33.7066	32.2295	33.5083	33.5896	32.4776	34.3376	33.7821
G10	Tyr	Undetermined	39.42	Undetermined	Undetermined	Undetermined	Undetermined	34.5832	Undetermined	Undetermined	38.2738	Undetermined	38.7081
G11	Zfp42	28.8156	28.4015	29.354	21.6362	21.4417	21.805	21.1669	21.2348	22.4936	20.9311	19.8673	20.7883
G12	Zic1	23.1601	22.2829	22.6164	26.9338	27.4154	27.8674	26.7327	26.6454	26.8556	26.3413	26.4515	26.4463
H1	Actb	15.6488	14.797	16.1549	16.1993	16.4479	17.1361	15.7209	15.8285	16.5306	15.8639	15.5494	15.7732
H2	B2m	19.5184	18.5778	19.6085	19.8204	20.5231	21.1495	19.663	19.4515	20.0004	19.3392	19.2372	19.6039
H3	Gapdh	18.404	17.5292	18.6825	18.5664	18.654	18.8768	17.6377	17.7487	18.6338	17.793	17.4158	17.6722
H4	Gusb	24.5521	23.5258	24.2403	23.8695	24.3363	24.4615	23.2996	23.2358	23.7186	23.4038	23.1814	23.5778
H5	Hsp90ab1	18.015	17.2446	17.9901	18.1623	17.9308	18.3857	17.5044	17.5972	18.411	17.5848	16.978	17.5588
H6	MGDC (Mouse Genomic DNA contamination	Undetermined	37.6734	35.5717	Undetermined	Undetermined	Undetermined	38.0786	Undetermined	Undetermined	37.8779	Undetermined	Undetermined
H7	Reverse transcription control	20.2598	19.5872	19.6996	20.2384	19.5007	19.7473	19.9774	19.5753	19.7156	20.2726	19.7006	19.751
H8	Reverse transcription control	20.2832	19.5775	19.6769	20.2035	19.5019	19.7791	19.9219	19.6087	19.6561	20.2998	19.6761	19.7193
H9	Reverse transcription control	20.28	28.1291	19.7333	20.2083	19.5226	19.7595	19.9579	19.5838	19.7041	20.3908	19.7265	19.7603
H10	Positive PCR Control	17.5121	17.4317	17.6549	17.9914	17.9989	17.7751	17.2856	17.5931	17.7188	17.7304	17.8794	17.5061
H11	Positive PCR Control	17.4589	17.4213	17.6288	18.0159	17.7675	18.863	17.3202	17.6598	17.683	17.7167	17.9056	17.4506
H12	Positive PCR Control	17.8366	17.777	18.1702	18.3084	18.2263	18.2859	17.6336	17.9947	18.0001	17.5571	18.3323	17.7806
*undetermined = insufficient signal at conclusion of PCR amplification to be assigned a signal
Two genes, Dnmt3b and Podxl, were excluded from the PCA/heatmap analysis: Qiagen incorrectly assigned Podxl as a murine pluripotency marker, and the Dnmt3b array primers are not specific to active isoforms (our own unpublished data).

## Sheet: Fig. 3_supp1, D, F
	Raw data from the western blot quantification Figure 3—figure supplement 1A, C
			Quantification within each lane was carried out using ImageJ. A single region of interest (ROI) was defined for each lane, plotted as a two-dimensional graph of the pixel intensity along the ROI, and the area of each peak calculated. The values indicate the area of each peak and its percentage value (%) of the total peak area. Zero value = no peak detected.
			Western blot H3K27me3/H3
			Biological replicate		1		2		3
			Protein	Sample name	Peak Area	Percent (%)	Peak Area	Percent (%)	Peak Area	Percent (%)
			H3	WT DMSO	18994.5	13.469	34051.7	16.579	9061.96	9.453
				WT GSKJ4	16159.3	11.458	12470.5	6.072	11465.2	11.96
				WT GSKJ5	18388.9	13.039	14047.4	6.839	9807.33	10.23
				Tert -/- DMSO	13148	9.323	12113.8	5.898	7746.89	8.081
				Tert -/- GSKJ4	3365.55	2.386	21905.3	10.665	6397.18	6.673
				Tert -/- GSKJ5	6306.5	4.472	22622.3	11.014	11790.5	12.299
			H3K27me3	WT DMSO		0		0		0
				WT GSKJ4		0		0		0
				WT GSKJ5		0		0		0
				Tert -/- DMSO	27213.9	12.131	17561.8	13.896	12708.2	12.701
				Tert -/- GSKJ4	12140.5	5.412	5989.92	4.74	2113.62	2.112
				Tert -/- GSKJ5	46080.7	20.541	18289	14.472	18510.4	18.499
			Western blot Nanog/Hsp90ab1
			Biological replicate		1		2		3
			Protein	Sample name	Peak Area	Percent	Peak Area	Percent	Peak Area	Percent
			Hsp90ab1	WT DMSO	3982.93	2.605	34111.5	17.593	56442.8	19.016
				WT GSKJ4	31819.1	20.809	18108.1	9.339	18102.6	6.099
				WT GSKJ5	13081.3	8.555	12118.9	6.25	24657.4	8.307
				Tert -/- DMSO	9650.44	6.311	9878.95	5.095	16798.4	5.659
				Tert -/- GSKJ4	18003.1	11.774	19560.6	10.089	30915.1	10.415
				Tert -/- GSKJ5	5224.25	3.417	18938	9.767	27951.9	9.417
			Nanog	WT DMSO		0		0	4883.47	2.115
				WT GSKJ4		0		0	16846.5	7.297
				WT GSKJ5		0		0	18576.6	8.046
				Tert -/- DMSO	35217.3	36.598	21606.2	34.236	47049.7	20.378
				Tert -/- GSKJ4	22783.4	23.677	21548.7	34.145	46722.1	20.236
				Tert -/- GSKJ5	35560	36.954	10892.5	17.26	50611	21.921

## Sheet: Fig.3_supp1, A, B
			Fold change from qPCR Figure 3—figure supplement 1A, B
				qPCR JMJD3
				Samples name	WT pluripotent LIF	WT 6DA	WT 6DA + 6DL	Tert -/- pluripotent LIF	Tert -/- 6DA	Tert -/- 6DA + 6DL
			n=1	Fold change	1	0.77	0.67	1.07	0.39	0.38
			n=2		1	0.72	0.22	0.32	0.25	0.2
			n=3		1	0.62	0.33	0.62	0.3	0.28
				qPCR UTX
				Samples name	WT pluripotent LIF	WT 6DA	WT 6DA + 6DL	Tert -/- pluripotent LIF	Tert -/- 6DA	Tert -/- 6DA + 6DL
			n=1	Fold change	1	0.22	0.16	0.43	0.15	0.17
			n=2		1	0.44	0.19	0.69	0.44	0.23
			n=3		1	0.38	0.27	0.69	0.31	0.34

## Sheet: Fig.3_supp1, I,J,K,L
			Indel frequency Figure 3—figure supplement 1 I,J,K,L
			Sample	% Indel	ICE	R Squared	Guide Sequences
			WT_Kdm6b	88	12	0.99	CCGTGAAGGGGTCTTGGGGT
			Tert-/-_Kdm6b	80	20	0.98	CCGTGAAGGGGTCTTGGGGT
			WT_Ezh2	35	7	0.111	ACCAAGAGTGGAAGCAGCGG
			Tert-/-_Ezh2	47	11	0.086	ACCAAGAGTGGAAGCAGCGG
			For more info : https://ice.synthego.com/#/

## Sheet: Fig.3_supp1, J, K
Raw data from the western blot quantification Figure 3—figure supplement 1J, K
		Quantification within each lane was carried out using ImageJ. A single region of interest (ROI) was defined for each lane, plotted as a two-dimensional graph of the pixel intensity along the ROI, and the area of each peak calculated. The values indicate the area of each peak and its percentage value (%) of the total peak area. Zero value = no peak detected.
		Western blot H3K27me3/H3
		Biological replicate		1		2
		Protein	Sample name	Peak Area	Percent (%)	Peak Area	Percent (%)
		H3	Tert -/- sgNT	28139.4	22.621	43911.3	28.735
			Tert -/- sgEzh2	31033.9	24.948	40715	26.643
			WT sgNT	32217.2	25.899	35900.6	23.493
			WT sgEzh2	33003.6	26.531	32288.8	21.129
		H3K27me3	Tert -/- sgNT	22978.3	22.268	38629.9	28.279
			Tert -/- sgEzh2	18786	18.205	30069.3	22.012
			WT sgNT	34428.4	33.364	40042	29.313
			WT sgEzh2	26997.5	26.163	27861.3	20.396
		Western blot H3K27me3/H3
		Biological replicate		1		2
		Protein	Sample name	Peak Area	Percent (%)	Peak Area	Percent (%)
		H3	Tert -/- sgNT	28687.8	20.192	19817.6	20.394
			Tert -/- sgKdm6b	45326.7	31.903	26990.2	27.776
			WT sgNT	29367.6	20.67	26285.4	27.05
			WT sgKdm6b	38693	27.234	24079.5	24.78
		H3K27me3	Tert -/- sgNT	14410.9	12.025	28850.7	13.029
			Tert -/- sgKdm6b	20836.9	17.387	35801.4	16.169
			WT sgNT	31622.3	26.387	57168.1	25.818
			WT sgKdm6b	52969.4	44.2	58703.7	26.512

## Sheet: Fig.3_supp1 L
GFP % values of the histogram presented in Figure 3—figure supplement 1L
	% of GFP positive cells after FACS analysis. Cells were first gated according to SSC-A/FSC-A. Doublets were then excluded (SSC-H/SSC-W and FSC-H/FSC-W) and GFP positives cells were gated. Values were analyzed and extracted with FlowJo.
	GFP %	Genotype and treatment	Biological replicate	sgNT	sgEzh2	sgKdm6b
		Tert -/-	1	0.57	0.34	0.24
			2	0.63	0.23	0.35
			3	0.59	0.41	0.17
		WT	1	11.1	17.1	6.5
			2	11.2	18.2	5.22
			3	10.7	11.1	5.04
