# Supplementary material for: Telomere dysfunction cooperates with epigenetic alterations to impair murine embryonic stem cell fate commitment
Source: eLife. 2020 Apr 16;9:e47333. doi: 10.7554/eLife.47333 (PMC7192583; doi:10.7554/eLife.47333)
Supplement: Figure 4—source data 1. [file elife-47333-fig4-data1.xls]

## Sheet: METADATA TEMPLATE 
# High-throughput sequencing metadata template (version 2.1).
# All fields in this template must be completed.
# Templates containing example data are found in the METADATA EXAMPLES spreadsheet tabs at the foot of this page.
# Field names (in blue on this page) should not be edited. Hover over cells containing field names to view field content guidelines.
# Human data. If there are patient privacy concerns regarding making data fully public through GEO, please submit to NCBI's dbGaP (http://www.ncbi.nlm.nih.gov/gap/) database. dbGaP has controlled access mechanisms and is an appropriate resource for hosting sensitive patient data.
SERIES
# This section describes the overall experiment.
title	Telomere dysfunction cooperates with epigenetic alterations to impair murine embryonic stem cell fate commitment
summary	This study demonstrates a specific cooperativity between perturbations in histone methylation and eroded telomeres to destabilize the differentiation of murine embryonic stem cells.
overall design	Murine embyronic stem cells of two different genotypes (WT or Tert-/-) were subjected to differentiation, and treated with compounds that modulated histone H3K27 tri-methylation to assess their impact upon the differentiation response
contributor	Mélanie Criqui
contributor	Tsz Wai Chu
contributor	Aditi Qamra
contributor	Monika Sharma
contributor	Julissa Tsao
contributor	Danielle Henry
contributor	Dalia Barsyte
contributor	Cheryl H. Arrowsmith
contributor	Neil Winegarden
contributor	Mathieu Lupien
contributor	Lea Harrington
supplementary file	Source data file 2 for Figure 4, Figure 4-figure supplement 1
SRA_center_name_code	[optional]
SAMPLES
# This section lists and describes each of the biological Samples under investgation, as well as any protocols that are specific to individual Samples.
# Additional "processed data file" or "raw file" columns may be included.
Sample name	title	source name	organism	characteristics: strain	characteristics: sequencing run#	characteristics: passage numbers	characteristics: treatment group	characteristics: sample preparation	molecule	description	processed data file	raw file	raw file	raw file	raw file
KO.2DL_undifferentiated	180222_KO_2DL_undifferentiated_S6	Tert-/- Embryonic stem cells	Mus musculus	129J	1	51	KO.2DL_undifferentiated	ATAC-seq	genomic DNA	Illumina sequencing	180222_KO_2DL_undifferentiated_S6_36bptrimnoadapremoval_FE.bdg	180222_KO_2DL_undifferentiated_S6_L001_R1_001.fastq.gz	180222_KO_2DL_undifferentiated_S6_L002_R1_001.fastq.gz	180222_KO_2DL_undifferentiated_S6_L003_R1_001.fastq.gz	180222_KO_2DL_undifferentiated_S6_L004_R1_001.fastq.gz
KO.2DL_undifferentiated	180419_KO_2DL_undifferentiated_S2	Tert-/- Embryonic stem cells	Mus musculus	129J	2	49	KO.2DL_undifferentiated	ATAC-seq	genomic DNA	Illumina sequencing	180419_KO_2DL_undifferentiated_S2_36bptrimnoadapremoval_FE.bdg	180419_KO_2DL_undifferentiated_S2_L001_R1_001.fastq.gz	180419_KO_2DL_undifferentiated_S2_L002_R1_001.fastq.gz	180419_KO_2DL_undifferentiated_S2_L003_R1_001.fastq.gz	180419_KO_2DL_undifferentiated_S2_L004_R1_001.fastq.gz
KO.2DL_undifferentiated	181002_KO_2DL_undifferentiated_S3	Tert-/- Embryonic stem cells	Mus musculus	129J	3	52	KO.2DL_undifferentiated	ATAC-seq	genomic DNA	Illumina sequencing	181002_KO_2DL_undifferentiated_S3_36bptrimnoadapremoval_FE.bdg	181002_KO_2DL_undifferentiated_S3_L001_R1_001.fastq.gz	181002_KO_2DL_undifferentiated_S3_L002_R1_001.fastq.gz	181002_KO_2DL_undifferentiated_S3_L003_R1_001.fastq.gz	181002_KO_2DL_undifferentiated_S3_L004_R1_001.fastq.gz
KO.6DA_GFP-	180221_KO_6DA_GFP_neg_S7	Tert-/- Embryonic stem cells	Mus musculus	129J	1	51	KO.6DA_GFP-	ATAC-seq	genomic DNA	Illumina sequencing	180221_KO_6DA_GFP_neg_S7_36bptrimnoadapremoval_FE.bdg	180221_KO_6DA_GFP_neg_S7_L001_R1_001.fastq.gz	180221_KO_6DA_GFP_neg_S7_L002_R1_001.fastq.gz	180221_KO_6DA_GFP_neg_S7_L003_R1_001.fastq.gz	180221_KO_6DA_GFP_neg_S7_L004_R1_001.fastq.gz
KO.6DA_GFP-	180419_KO_6DA_GFP_neg_S6	Tert-/- Embryonic stem cells	Mus musculus	129J	2	49	KO.6DA_GFP-	ATAC-seq	genomic DNA	Illumina sequencing	180419_KO_6DA_GFP_neg_S6_36bptrimnoadapremoval_FE.bdg	180419_KO_6DA_GFP_neg_S6_L001_R1_001.fastq.gz	180419_KO_6DA_GFP_neg_S6_L002_R1_001.fastq.gz	180419_KO_6DA_GFP_neg_S6_L003_R1_001.fastq.gz	180419_KO_6DA_GFP_neg_S6_L004_R1_001.fastq.gz
KO.6DA_GFP_pos	180221_KO_6DA_GFP_pos_S6	Tert-/- Embryonic stem cells	Mus musculus	129J	1	51	KO.6DA_GFP_pos	ATAC-seq	genomic DNA	Illumina sequencing	Not applicable: sample failed QC and was not included in analysis	180221_KO_6DA_GFP_pos_S6_L001_R1_001.fastq.gz	180221_KO_6DA_GFP_pos_S6_L002_R1_001.fastq.gz	180221_KO_6DA_GFP_pos_S6_L003_R1_001.fastq.gz	180221_KO_6DA_GFP_pos_S6_L004_R1_001.fastq.gz
KO.6DA_GFP_pos	180419_KO_6DA_GFP_plus_S5	Tert-/- Embryonic stem cells	Mus musculus	129J	2	49	KO.6DA_GFP_pos	ATAC-seq	genomic DNA	Illumina sequencing	180419_KO_6DA_GFP_plus_S5_36bptrimnoadapremoval_FE.bdg	180419_KO_6DA_GFP_plus_S5_L001_R1_001.fastq.gz	180419_KO_6DA_GFP_plus_S5_L002_R1_001.fastq.gz	180419_KO_6DA_GFP_plus_S5_L003_R1_001.fastq.gz	180419_KO_6DA_GFP_plus_S5_L004_R1_001.fastq.gz
KO.6DA_GFP_pos	181002_KO_6DA_GFP_plus_S5	Tert-/- Embryonic stem cells	Mus musculus	129J	3	52	KO.6DA_GFP_pos	ATAC-seq	genomic DNA	Illumina sequencing	181002_KO_6DA_GFP_plus_S5_36bptrimnoadapremoval_FE.bdg	181002_KO_6DA_GFP_plus_S5_L001_R1_001.fastq.gz	181002_KO_6DA_GFP_plus_S5_L002_R1_001.fastq.gz	181002_KO_6DA_GFP_plus_S5_L003_R1_001.fastq.gz	181002_KO_6DA_GFP_plus_S5_L004_R1_001.fastq.gz
KO.6DA_unsorted	180221_KO_6DA_unsorted_S8	Tert-/- Embryonic stem cells	Mus musculus	129J	1	51	KO.6DA_unsorted	ATAC-seq	genomic DNA	Illumina sequencing	180221_KO_6DA_unsorted_S8_36bptrimnoadapremoval_FE.bdg	180221_KO_6DA_unsorted_S8_L001_R1_001.fastq.gz	180221_KO_6DA_unsorted_S8_L002_R1_001.fastq.gz	180221_KO_6DA_unsorted_S8_L003_R1_001.fastq.gz	180221_KO_6DA_unsorted_S8_L004_R1_001.fastq.gz
KO.6DA_unsorted	180419_KO_6DA_unsorted_S4	Tert-/- Embryonic stem cells	Mus musculus	129J	2	49	KO.6DA_unsorted	ATAC-seq	genomic DNA	Illumina sequencing	180419_KO_6DA_unsorted_S4_36bptrimnoadapremoval_FE.bdg	180419_KO_6DA_unsorted_S4_L001_R1_001.fastq.gz	180419_KO_6DA_unsorted_S4_L002_R1_001.fastq.gz	180419_KO_6DA_unsorted_S4_L003_R1_001.fastq.gz	180419_KO_6DA_unsorted_S4_L004_R1_001.fastq.gz
KO.6DA_unsorted	181002_KO_6DA_unsorted_S4	Tert-/- Embryonic stem cells	Mus musculus	129J	3	52	KO.6DA_unsorted	ATAC-seq	genomic DNA	Illumina sequencing	181002_KO_6DA_unsorted_S4_36bptrimnoadapremoval_FE.bdg	181002_KO_6DA_unsorted_S4_L001_R1_001.fastq.gz	181002_KO_6DA_unsorted_S4_L002_R1_001.fastq.gz	181002_KO_6DA_unsorted_S4_L003_R1_001.fastq.gz	181002_KO_6DA_unsorted_S4_L004_R1_001.fastq.gz
KO.6DL_A395	180221_KO_6DL_A395_S12	Tert-/- Embryonic stem cells	Mus musculus	129J	1	51	KO.6DL_A395	ATAC-seq	genomic DNA	Illumina sequencing	180221_KO_6DL_A395_S12_36bptrimnoadapremoval_FE.bdg	180221_KO_6DL_A395_S12_L001_R1_001.fastq.gz	180221_KO_6DL_A395_S12_L002_R1_001.fastq.gz	180221_KO_6DL_A395_S12_L003_R1_001.fastq.gz	180221_KO_6DL_A395_S12_L004_R1_001.fastq.gz
KO.6DL_A395	180423_KO_6DL_A395_S6	Tert-/- Embryonic stem cells	Mus musculus	129J	2	49	KO.6DL_A395	ATAC-seq	genomic DNA	Illumina sequencing	180423_KO_6DL_A395_S6_36bptrimnoadapremoval_FE.bdg	180423_KO_6DL_A395_S6_L001_R1_001.fastq.gz	180423_KO_6DL_A395_S6_L002_R1_001.fastq.gz	180423_KO_6DL_A395_S6_L003_R1_001.fastq.gz	180423_KO_6DL_A395_S6_L004_R1_001.fastq.gz
KO.6DL_A395N	180222_KO_6DL_A395N_S1	Tert-/- Embryonic stem cells	Mus musculus	129J	1	51	KO.6DL_A395N	ATAC-seq	genomic DNA	Illumina sequencing	180222_KO_6DL_A395N_S1_36bptrimnoadapremoval_FE.bdg	180222_KO_6DL_A395N_S1_L001_R1_001.fastq.gz	180222_KO_6DL_A395N_S1_L002_R1_001.fastq.gz	180222_KO_6DL_A395N_S1_L003_R1_001.fastq.gz	180222_KO_6DL_A395N_S1_L004_R1_001.fastq.gz
KO.6DL_A395N	180424_KO_6DL_A395N_S1	Tert-/- Embryonic stem cells	Mus musculus	129J	2	49	KO.6DL_A395N	ATAC-seq	genomic DNA	Illumina sequencing	180424_KO_6DL_A395N_S1_36bptrimnoadapremoval_FE.bdg	180424_KO_6DL_A395N_S1_L001_R1_001.fastq.gz	180424_KO_6DL_A395N_S1_L002_R1_001.fastq.gz	180424_KO_6DL_A395N_S1_L003_R1_001.fastq.gz	180424_KO_6DL_A395N_S1_L004_R1_001.fastq.gz
KO.6DL_GFP_-	180222_KO_6DL_GFP_neg_S10	Tert-/- Embryonic stem cells	Mus musculus	129J	1	51	KO.6DL_GFP_-	ATAC-seq	genomic DNA	Illumina sequencing	180222_KO_6DL_GFP_neg_S10_36bptrimnoadapremoval_FE.bdg	180222_KO_6DL_GFP_neg_S10_L001_R1_001.fastq.gz	180222_KO_6DL_GFP_neg_S10_L002_R1_001.fastq.gz	180222_KO_6DL_GFP_neg_S10_L003_R1_001.fastq.gz	180222_KO_6DL_GFP_neg_S10_L004_R1_001.fastq.gz
KO.6DL_GFP_-	180419_KO_6DL_GFP_S4	Tert-/- Embryonic stem cells	Mus musculus	129J	2	49	KO.6DL_GFP_-	ATAC-seq	genomic DNA	Illumina sequencing	180419_KO_6DL_GFP_neg_S4_36bptrimnoadapremoval_FE.bdg	180419_KO_6DL_GFP_neg_S4_L001_R1_001.fastq.gz	180419_KO_6DL_GFP_neg_S4_L002_R1_001.fastq.gz	180419_KO_6DL_GFP_neg_S4_L003_R1_001.fastq.gz	180419_KO_6DL_GFP_neg_S4_L004_R1_001.fastq.gz
KO.6DL_GFP_pos	180222_KO_6DL_GFP_pos_S9	Tert-/- Embryonic stem cells	Mus musculus	129J	1	51	KO.6DL_GFP_pos	ATAC-seq	genomic DNA	Illumina sequencing	180222_KO_6DL_GFP_pos_S9_36bptrimnoadapremoval_FE.bdg	180222_KO_6DL_GFP_pos_S9_L001_R1_001.fastq.gz	180222_KO_6DL_GFP_pos_S9_L002_R1_001.fastq.gz	180222_KO_6DL_GFP_pos_S9_L003_R1_001.fastq.gz	180222_KO_6DL_GFP_pos_S9_L004_R1_001.fastq.gz
KO.6DL_GFP_pos	180419_KO_6DL_GFP_plus_S3	Tert-/- Embryonic stem cells	Mus musculus	129J	2	49	KO.6DL_GFP_pos	ATAC-seq	genomic DNA	Illumina sequencing	180419_KO_6DL_GFP_plus_S3_36bptrimnoadapremoval_FE.bdg	180419_KO_6DL_GFP_plus_S3_L001_R1_001.fastq.gz	180419_KO_6DL_GFP_plus_S3_L002_R1_001.fastq.gz	180419_KO_6DL_GFP_plus_S3_L003_R1_001.fastq.gz	180419_KO_6DL_GFP_plus_S3_L004_R1_001.fastq.gz
KO.6DL_GSK343	180221_KO_6DL_GSK343_S11	Tert-/- Embryonic stem cells	Mus musculus	129J	1	51	KO.6DL_GSK343	ATAC-seq	genomic DNA	Illumina sequencing	180221_KO_6DL_GSK343_S11_36bptrimnoadapremoval_FE.bdg	180221_KO_6DL_GSK343_S11_L001_R1_001.fastq.gz	180221_KO_6DL_GSK343_S11_L002_R1_001.fastq.gz	180221_KO_6DL_GSK343_S11_L003_R1_001.fastq.gz	180221_KO_6DL_GSK343_S11_L004_R1_001.fastq.gz
KO.6DL_GSK343	180423_KO_6DL_GSK343_S5	Tert-/- Embryonic stem cells	Mus musculus	129J	2	49	KO.6DL_GSK343	ATAC-seq	genomic DNA	Illumina sequencing	180423_KO_6DL_GSK343_S5_36bptrimnoadapremoval_FE.bdg	180423_KO_6DL_GSK343_S5_L001_R1_001.fastq.gz	180423_KO_6DL_GSK343_S5_L002_R1_001.fastq.gz	180423_KO_6DL_GSK343_S5_L003_R1_001.fastq.gz	180423_KO_6DL_GSK343_S5_L004_R1_001.fastq.gz
KO.6DL_GSK343	181002_KO_6DL_GSK343_7_S7	Tert-/- Embryonic stem cells	Mus musculus	129J	3	52	KO.6DL_GSK343	ATAC-seq	genomic DNA	Illumina sequencing	181002_KO_6DL_GSK343_7_S7_36bptrimnoadapremoval_FE.bdg	181002_KO_6DL_GSK343_7_S7_L001_R1_001.fastq.gz	181002_KO_6DL_GSK343_7_S7_L002_R1_001.fastq.gz	181002_KO_6DL_GSK343_7_S7_L003_R1_001.fastq.gz	181002_KO_6DL_GSK343_7_S7_L004_R1_001.fastq.gz
KO.6DL_GSK343	181002_KO_6DL_GSK343_1_S1	Tert-/- Embryonic stem cells	Mus musculus	129J	3	52	KO.6DL_GSK343	ATAC-seq	genomic DNA	Illumina sequencing	181002_KO_6DL_GSK343_1_S1_36bptrimnoadapremoval_FE.bdg	181002_KO_6DL_GSK343_1_S1_L001_R1_001.fastq.gz	181002_KO_6DL_GSK343_1_S1_L002_R1_001.fastq.gz	181002_KO_6DL_GSK343_1_S1_L003_R1_001.fastq.gz	181002_KO_6DL_GSK343_1_S1_L004_R1_001.fastq.gz
KO.6DL_GSKJ4	180222_KO_6DL_GSKJ4_S2	Tert-/- Embryonic stem cells	Mus musculus	129J	1	51	KO.6DL_GSKJ4	ATAC-seq	genomic DNA	Illumina sequencing	180222_KO_6DL_GSKJ4_S2_36bptrimnoadapremoval_FE.bdg	180222_KO_6DL_GSKJ4_S2_L001_R1_001.fastq.gz	180222_KO_6DL_GSKJ4_S2_L002_R1_001.fastq.gz	180222_KO_6DL_GSKJ4_S2_L003_R1_001.fastq.gz	180222_KO_6DL_GSKJ4_S2_L004_R1_001.fastq.gz
KO.6DL_GSKJ4	180424_KO_6DL_GSKJ4_S2	Tert-/- Embryonic stem cells	Mus musculus	129J	2	49	KO.6DL_GSKJ4	ATAC-seq	genomic DNA	Illumina sequencing	180424_KO_6DL_GSKJ4_S2_36bptrimnoadapremoval_FE.bdg	180424_KO_6DL_GSKJ4_S2_L001_R1_001.fastq.gz	180424_KO_6DL_GSKJ4_S2_L002_R1_001.fastq.gz	180424_KO_6DL_GSKJ4_S2_L003_R1_001.fastq.gz	180424_KO_6DL_GSKJ4_S2_L004_R1_001.fastq.gz
KO.6DL_GSKJ5	180222_KO_6DL_GSKJ5_S3	Tert-/- Embryonic stem cells	Mus musculus	129J	1	51	KO.6DL_GSKJ5	ATAC-seq	genomic DNA	Illumina sequencing	180222_KO_6DL_GSKJ5_S3_36bptrimnoadapremoval_FE.bdg	180222_KO_6DL_GSKJ5_S3_L001_R1_001.fastq.gz	180222_KO_6DL_GSKJ5_S3_L002_R1_001.fastq.gz	180222_KO_6DL_GSKJ5_S3_L003_R1_001.fastq.gz	180222_KO_6DL_GSKJ5_S3_L004_R1_001.fastq.gz
KO.6DL_GSKJ5	180423_KO_6DL_GSKJ5_S1	Tert-/- Embryonic stem cells	Mus musculus	129J	2	49	KO.6DL_GSKJ5	ATAC-seq	genomic DNA	Illumina sequencing	180423_KO_6DL_GSKJ5_S1_36bptrimnoadapremoval_FE.bdg	180423_KO_6DL_GSKJ5_S1_L001_R1_001.fastq.gz	180423_KO_6DL_GSKJ5_S1_L002_R1_001.fastq.gz	180423_KO_6DL_GSKJ5_S1_L003_R1_001.fastq.gz	180423_KO_6DL_GSKJ5_S1_L004_R1_001.fastq.gz
KO.6DL_UNC1999	180221_KO_6DL_UNC1999_S9	Tert-/- Embryonic stem cells	Mus musculus	129J	1	51	KO.6DL_UNC1999	ATAC-seq	genomic DNA	Illumina sequencing	180221_KO_6DL_UNC1999_S9_36bptrimnoadapremoval_FE.bdg	180221_KO_6DL_UNC1999_S9_L001_R1_001.fastq.gz	180221_KO_6DL_UNC1999_S9_L002_R1_001.fastq.gz	180221_KO_6DL_UNC1999_S9_L003_R1_001.fastq.gz	180221_KO_6DL_UNC1999_S9_L004_R1_001.fastq.gz
KO.6DL_UNC1999	180419_KO_6DL_UNC1999_S5	Tert-/- Embryonic stem cells	Mus musculus	129J	2	49	KO.6DL_UNC1999	ATAC-seq	genomic DNA	Illumina sequencing	180419_KO_6DL_UNC1999_S5_36bptrimnoadapremoval_FE.bdg	180419_KO_6DL_UNC1999_S5_L001_R1_001.fastq.gz	180419_KO_6DL_UNC1999_S5_L002_R1_001.fastq.gz	180419_KO_6DL_UNC1999_S5_L003_R1_001.fastq.gz	180419_KO_6DL_UNC1999_S5_L004_R1_001.fastq.gz
KO.6DL_UNC2400	180221_KO_6DL_UNC2400_S10	Tert-/- Embryonic stem cells	Mus musculus	129J	1	51	KO.6DL_UNC2400	ATAC-seq	genomic DNA	Illumina sequencing	180221_KO_6DL_UNC2400_S10_36bptrimnoadapremoval_FE.bdg	180221_KO_6DL_UNC2400_S10_L001_R1_001.fastq.gz	180221_KO_6DL_UNC2400_S10_L002_R1_001.fastq.gz	180221_KO_6DL_UNC2400_S10_L003_R1_001.fastq.gz	180221_KO_6DL_UNC2400_S10_L004_R1_001.fastq.gz
KO.6DL_UNC2400	180419_KO_6DL_UNC2400_S6	Tert-/- Embryonic stem cells	Mus musculus	129J	2	49	KO.6DL_UNC2400	ATAC-seq	genomic DNA	Illumina sequencing	180419_KO_6DL_UNC2400_S6_36bptrimnoadapremoval_FE.bdg	180419_KO_6DL_UNC2400_S6_L001_R1_001.fastq.gz	180419_KO_6DL_UNC2400_S6_L002_R1_001.fastq.gz	180419_KO_6DL_UNC2400_S6_L003_R1_001.fastq.gz	180419_KO_6DL_UNC2400_S6_L004_R1_001.fastq.gz
KO.6DL_unsorted-untreated	180222_KO_6DL_unsorted_untreated_S8	Tert-/- Embryonic stem cells	Mus musculus	129J	1	51	KO.6DL_unsorted-untreated	ATAC-seq	genomic DNA	Illumina sequencing	180222_KO_6DL_unsorted_untreated_S8_36bptrimnoadapremoval_FE.bdg	180222_KO_6DL_unsorted_untreated_S8_L001_R1_001.fastq.gz	180222_KO_6DL_unsorted_untreated_S8_L002_R1_001.fastq.gz	180222_KO_6DL_unsorted_untreated_S8_L003_R1_001.fastq.gz	180222_KO_6DL_unsorted_untreated_S8_L004_R1_001.fastq.gz
KO.6DL_unsorted-untreated	180419_KO_6DL_unsorted_untreated_S2	Tert-/- Embryonic stem cells	Mus musculus	129J	2	49	KO.6DL_unsorted-untreated	ATAC-seq	genomic DNA	Illumina sequencing	180419_KO_6DL_unsorted_untreated_S2_36bptrimnoadapremoval_FE.bdg	180419_KO_6DL_unsorted_untreated_S2_L001_R1_001.fastq.gz	180419_KO_6DL_unsorted_untreated_S2_L002_R1_001.fastq.gz	180419_KO_6DL_unsorted_untreated_S2_L003_R1_001.fastq.gz	180419_KO_6DL_unsorted_untreated_S2_L004_R1_001.fastq.gz
KO.6DL_unsorted-untreated	181002_KO_6DL_unsorted_untreated_S6	Tert-/- Embryonic stem cells	Mus musculus	129J	3	52	KO.6DL_unsorted	ATAC-seq	genomic DNA	Illumina sequencing	181002_KO_6DL_unsorted_untreated_S6_36bptrimnoadapremoval_FE.bdg	181002_KO_6DL_unsorted_untreated_S6_L001_R1_001.fastq.gz	181002_KO_6DL_unsorted_untreated_S6_L002_R1_001.fastq.gz	181002_KO_6DL_unsorted_untreated_S6_L003_R1_001.fastq.gz	181002_KO_6DL_unsorted_untreated_S6_L004_R1_001.fastq.gz
WT.2DL_undifferentiated	180222_WT_2DL_undifferentiated_S5	wild-type Embryonic stem cells	Mus musculus	129J	1	68	WT.2DL_undifferentiated	ATAC-seq	genomic DNA	Illumina sequencing	180222_WT_2DL_undifferentiated_S5_36bptrimnoadapremoval_FE.bdg	180222_WT_2DL_undifferentiated_S5_L001_R1_001.fastq.gz	180222_WT_2DL_undifferentiated_S5_L002_R1_001.fastq.gz	180222_WT_2DL_undifferentiated_S5_L003_R1_001.fastq.gz	180222_WT_2DL_undifferentiated_S5_L004_R1_001.fastq.gz
WT.2DL_undifferentiated	180419_WT_2DL_undifferentiated_S1	wild-type Embryonic stem cells	Mus musculus	129J	2	61	WT.2DL_undifferentiated	ATAC-seq	genomic DNA	Illumina sequencing	180419_WT_2DL_undifferentiated_S1_36bptrimnoadapremoval_FE.bdg	180419_WT_2DL_undifferentiated_S1_L001_R1_001.fastq.gz	180419_WT_2DL_undifferentiated_S1_L002_R1_001.fastq.gz	180419_WT_2DL_undifferentiated_S1_L003_R1_001.fastq.gz	180419_WT_2DL_undifferentiated_S1_L004_R1_001.fastq.gz
WT.2DL_undifferentiated	181002_WT_2DL_undifferentiated_S2	wild-type Embryonic stem cells	Mus musculus	129J	3	80	WT.2DL_undifferentiated	ATAC-seq	genomic DNA	Illumina sequencing	181002_WT_2DL_undifferentiated_S2_36bptrimnoadapremoval_FE.bdg	181002_WT_2DL_undifferentiated_S2_L001_R1_001.fastq.gz	181002_WT_2DL_undifferentiated_S2_L002_R1_001.fastq.gz	181002_WT_2DL_undifferentiated_S2_L003_R1_001.fastq.gz	181002_WT_2DL_undifferentiated_S2_L004_R1_001.fastq.gz
WT.6DA	180221_WT_6DA_S5	wild-type Embryonic stem cells	Mus musculus	129J	1	68	WT.6DA	ATAC-seq	genomic DNA	Illumina sequencing	180221_WT_6DA_S5_36bptrimnoadapremoval_FE.bdg	180221_WT_6DA_S5_L001_R1_001.fastq.gz	180221_WT_6DA_S5_L002_R1_001.fastq.gz	180221_WT_6DA_S5_L003_R1_001.fastq.gz	180221_WT_6DA_S5_L004_R1_001.fastq.gz
WT.6DA	180419_WT_6DA_S3	wild-type Embryonic stem cells	Mus musculus	129J	2	61	WT.6DA	ATAC-seq	genomic DNA	Illumina sequencing	180419_WT_6DA_S3_36bptrimnoadapremoval_FE.bdg	180419_WT_6DA_S3_L001_R1_001.fastq.gz	180419_WT_6DA_S3_L002_R1_001.fastq.gz	180419_WT_6DA_S3_L003_R1_001.fastq.gz	180419_WT_6DA_S3_L004_R1_001.fastq.gz
WT.6DL	180222_WT_6DL_S7	wild-type Embryonic stem cells	Mus musculus	129J	1	68	WT.6DL	ATAC-seq	genomic DNA	Illumina sequencing	180222_WT_6DL_S7_36bptrimnoadapremoval_FE.bdg	180222_WT_6DL_S7_L001_R1_001.fastq.gz	180222_WT_6DL_S7_L002_R1_001.fastq.gz	180222_WT_6DL_S7_L003_R1_001.fastq.gz	180222_WT_6DL_S7_L004_R1_001.fastq.gz
WT.6DL	180419_WT_6DL_S1	wild-type Embryonic stem cells	Mus musculus	129J	2	61	WT.6DL	ATAC-seq	genomic DNA	Illumina sequencing	180419_WT_6DL_S1_36bptrimnoadapremoval_FE.bdg	180419_WT_6DL_S1_L001_R1_001.fastq.gz	180419_WT_6DL_S1_L002_R1_001.fastq.gz	180419_WT_6DL_S1_L003_R1_001.fastq.gz	180419_WT_6DL_S1_L004_R1_001.fastq.gz
WT.6DL_A395	180222_WT_6DL_A395_S4	wild-type Embryonic stem cells	Mus musculus	129J	1	68	WT.6DL_A395	ATAC-seq	genomic DNA	Illumina sequencing	180222_WT_6DL_A395_S4_36bptrimnoadapremoval_FE.bdg	180222_WT_6DL_A395_S4_L001_R1_001.fastq.gz	180222_WT_6DL_A395_S4_L002_R1_001.fastq.gz	180222_WT_6DL_A395_S4_L003_R1_001.fastq.gz	180222_WT_6DL_A395_S4_L004_R1_001.fastq.gz
WT.6DL_A395	180424_WT_6DL_A395_S3	wild-type Embryonic stem cells	Mus musculus	129J	2	61	WT.6DL_A395	ATAC-seq	genomic DNA	Illumina sequencing	180424_WT_6DL_A395_S3_36bptrimnoadapremoval_FE.bdg	180424_WT_6DL_A395_S3_L001_R1_001.fastq.gz	180424_WT_6DL_A395_S3_L002_R1_001.fastq.gz	180424_WT_6DL_A395_S3_L003_R1_001.fastq.gz	180424_WT_6DL_A395_S3_L004_R1_001.fastq.gz
WT.6DL_A395N	180221_WT_6DL_A395N_S4	wild-type Embryonic stem cells	Mus musculus	129J	1	68	WT.6DL_A395N	ATAC-seq	genomic DNA	Illumina sequencing	180221_WT_6DL_A395N_S4_36bptrimnoadapremoval_FE.bdg	180221_WT_6DL_A395N_S4_L001_R1_001.fastq.gz	180221_WT_6DL_A395N_S4_L002_R1_001.fastq.gz	180221_WT_6DL_A395N_S4_L003_R1_001.fastq.gz	180221_WT_6DL_A395N_S4_L004_R1_001.fastq.gz
WT.6DL_A395N	180424_WT_6DL_A395N_S4	wild-type Embryonic stem cells	Mus musculus	129J	2	61	WT.6DL_A395N	ATAC-seq	genomic DNA	Illumina sequencing	180424_WT_6DL_A395N_S4_36bptrimnoadapremoval_FE.bdg	180424_WT_6DL_A395N_S4_L001_R1_001.fastq.gz	180424_WT_6DL_A395N_S4_L002_R1_001.fastq.gz	180424_WT_6DL_A395N_S4_L003_R1_001.fastq.gz	180424_WT_6DL_A395N_S4_L004_R1_001.fastq.gz
WT.6DL_GSK343	180221_WT_6DL_GSK343_S3	wild-type Embryonic stem cells	Mus musculus	129J	1	68	WT.6DL_GSK343	ATAC-seq	genomic DNA	Illumina sequencing	180221_WT_6DL_GSK343_S3_36bptrimnoadapremoval_FE.bdg	180221_WT_6DL_GSK343_S3_L001_R1_001.fastq.gz	180221_WT_6DL_GSK343_S3_L002_R1_001.fastq.gz	180221_WT_6DL_GSK343_S3_L003_R1_001.fastq.gz	180221_WT_6DL_GSK343_S3_L004_R1_001.fastq.gz
WT.6DL_GSK343	180423_WT_6DL_GSK343_S4	wild-type Embryonic stem cells	Mus musculus	129J	2	61	WT.6DL_GSK343	ATAC-seq	genomic DNA	Illumina sequencing	180423_WT_6DL_GSK343_S4_36bptrimnoadapremoval_FE.bdg	180423_WT_6DL_GSK343_S4_L001_R1_001.fastq.gz	180423_WT_6DL_GSK343_S4_L002_R1_001.fastq.gz	180423_WT_6DL_GSK343_S4_L003_R1_001.fastq.gz	180423_WT_6DL_GSK343_S4_L004_R1_001.fastq.gz
WT.6DL_GSK343	181002_WT_6DL_GSK343_S8	wild-type Embryonic stem cells	Mus musculus	129J	3	80	WT.6DL_GSK343	ATAC-seq	genomic DNA	Illumina sequencing	181002_WT_6DL_GSK343_S8_36bptrimnoadapremoval_FE.bdg	181002_WT_6DL_GSK343_S8_L001_R1_001.fastq.gz	181002_WT_6DL_GSK343_S8_L002_R1_001.fastq.gz	181002_WT_6DL_GSK343_S8_L003_R1_001.fastq.gz	181002_WT_6DL_GSK343_S8_L004_R1_001.fastq.gz
WT.6DL_GSKJ4	180222_WT_6DL_GSKJ4_S11	wild-type Embryonic stem cells	Mus musculus	129J	1	68	WT.6DL_GSKJ4	ATAC-seq	genomic DNA	Illumina sequencing	180222_WT_6DL_GSKJ4_S11_36bptrimnoadapremoval_FE.bdg	180222_WT_6DL_GSKJ4_S11_L001_R1_001.fastq.gz	180222_WT_6DL_GSKJ4_S11_L002_R1_001.fastq.gz	180222_WT_6DL_GSKJ4_S11_L003_R1_001.fastq.gz	180222_WT_6DL_GSKJ4_S11_L004_R1_001.fastq.gz
WT.6DL_GSKJ4	180424_WT_6DL_GSKJ4_S5	wild-type Embryonic stem cells	Mus musculus	129J	2	61	WT.6DL_GSKJ4	ATAC-seq	genomic DNA	Illumina sequencing	180424_WT_6DL_GSKJ4_S5_36bptrimnoadapremoval_FE.bdg	180424_WT_6DL_GSKJ4_S5_L001_R1_001.fastq.gz	180424_WT_6DL_GSKJ4_S5_L002_R1_001.fastq.gz	180424_WT_6DL_GSKJ4_S5_L003_R1_001.fastq.gz	180424_WT_6DL_GSKJ4_S5_L004_R1_001.fastq.gz
WT.6DL_GSKJ5	180222_WT_6DL_GSKJ5_S12	wild-type Embryonic stem cells	Mus musculus	129J	1	68	WT.6DL_GSKJ5	ATAC-seq	genomic DNA	Illumina sequencing	180222_WT_6DL_GSKJ5_S12_36bptrimnoadapremoval_FE.bdg	180222_WT_6DL_GSKJ5_S12_L001_R1_001.fastq.gz	180222_WT_6DL_GSKJ5_S12_L002_R1_001.fastq.gz	180222_WT_6DL_GSKJ5_S12_L003_R1_001.fastq.gz	180222_WT_6DL_GSKJ5_S12_L004_R1_001.fastq.gz
WT.6DL_GSKJ5	180424_WT_6DL_GSKJ5_S6	wild-type Embryonic stem cells	Mus musculus	129J	2	61	WT.6DL_GSKJ5	ATAC-seq	genomic DNA	Illumina sequencing	180424_WT_6DL_GSKJ5_S6_36bptrimnoadapremoval_FE.bdg	180424_WT_6DL_GSKJ5_S6_L001_R1_001.fastq.gz	180424_WT_6DL_GSKJ5_S6_L002_R1_001.fastq.gz	180424_WT_6DL_GSKJ5_S6_L003_R1_001.fastq.gz	180424_WT_6DL_GSKJ5_S6_L004_R1_001.fastq.gz
WT.6DL_UNC1999	180221_WT_6DL_UNC1999_S1	wild-type Embryonic stem cells	Mus musculus	129J	1	68	WT.6DL_UNC1999	ATAC-seq	genomic DNA	Illumina sequencing	180221_WT_6DL_UNC1999_S1_36bptrimnoadapremoval_FE.bdg	180221_WT_6DL_UNC1999_S1_L001_R1_001.fastq.gz	180221_WT_6DL_UNC1999_S1_L002_R1_001.fastq.gz	180221_WT_6DL_UNC1999_S1_L003_R1_001.fastq.gz	180221_WT_6DL_UNC1999_S1_L004_R1_001.fastq.gz
WT.6DL_UNC1999	180423_WT_6DL_UNC1999_S2	wild-type Embryonic stem cells	Mus musculus	129J	2	61	WT.6DL_UNC1999	ATAC-seq	genomic DNA	Illumina sequencing	180423_WT_6DL_UNC1999_S2_36bptrimnoadapremoval_FE.bdg	180423_WT_6DL_UNC1999_S2_L001_R1_001.fastq.gz	180423_WT_6DL_UNC1999_S2_L002_R1_001.fastq.gz	180423_WT_6DL_UNC1999_S2_L003_R1_001.fastq.gz	180423_WT_6DL_UNC1999_S2_L004_R1_001.fastq.gz
WT.6DL_UNC2400	180221_WT_6DL_UNC2400_S2	wild-type Embryonic stem cells	Mus musculus	129J	1	68	WT.6DL_UNC2400	ATAC-seq	genomic DNA	Illumina sequencing	180221_WT_6DL_UNC2400_S2_36bptrimnoadapremoval_FE.bdg	180221_WT_6DL_UNC2400_S2_L001_R1_001.fastq.gz	180221_WT_6DL_UNC2400_S2_L002_R1_001.fastq.gz	180221_WT_6DL_UNC2400_S2_L003_R1_001.fastq.gz	180221_WT_6DL_UNC2400_S2_L004_R1_001.fastq.gz
WT.6DL_UNC2400	180423_WT_6DL_UNC2400_S3	wild-type Embryonic stem cells	Mus musculus	129J	2	61	WT.6DL_UNC2400	ATAC-seq	genomic DNA	Illumina sequencing	180423_WT_6DL_UNC2400_S3_36bptrimnoadapremoval_FE.bdg	180423_WT_6DL_UNC2400_S3_L001_R1_001.fastq.gz	180423_WT_6DL_UNC2400_S3_L002_R1_001.fastq.gz	180423_WT_6DL_UNC2400_S3_L003_R1_001.fastq.gz	180423_WT_6DL_UNC2400_S3_L004_R1_001.fastq.gz
PROTOCOLS
# Any of the protocols below which are applicable to only a subset of Samples should be included as additional columns of the SAMPLES section instead.
growth protocol	Murine embryonic stem cells were thawed (initial cell passage indicated), cultured in LIF containing media for 2 days (2DL), transferred to media containing 5 micromolar ATRA for a further 6 days (6DA) and transferred to LIF-containing media for a further 6 days (6DL). Where indicated, samples were sorted via FACS for GFP status (positive= pos or plus; negative = neg).
treatment protocol	ESC populations were untreated or treated throughout the 14 day differentiation treatment with the compounds indicated: A395, A395N, UNC1999, UNC2400, GSK343, GSKJ4, GSK5. The compound concentration was 1 micromolar for all compounds except GSK343 (3 micromolar)
extract protocol	Frozen ESC pellets were thawed and assessed for viability followed by nuclei preparation and treatment with Tn5 transposase. The samples were subjected to PCR amplification and DNA purification. Adapted from Buenostro et al., 2015; doi:10.1002/0471142727.mb2129s109
library construction protocol	Libraries were generated and optimized by PCR amplification, purified, and verified for proper size selection using a Agilent BioAnalyzer
library strategy	To determine if the ATAC reactions were successful, an assessment of the overall enrichment of open chromatin regions was assayed by qPCR. Enrichment scores were calculated for each possible open vs closed region (2^(Ct_Open – Ct_Closed)). Scores over 10 were considered to be positively enriched.
DATA PROCESSING PIPELINE
# Data processing steps include base-calling, alignment, filtering, peak-calling, generation of normalized abundance measurements etc…
# For each step provide a description, as well as software name, version, parameters, if applicable.
# Include additional steps, as necessary.
data processing step	Libraries were sequenced with 75 bp single-end reads
data processing step	Sequences were trimmed to 36 bp and mapped to mm9 using Bowtie 2 (v2.0.5) with default parameters (http://bowtie-bio.sourceforge.net/bowtie2/index.shtml)
data processing step	Any sample reads with less than 10M and/or peaks less than 20 M were excluded from further analysis. Poor quality reads (MAPQ<=30, reads mapping to chrM, chrY and patch chromosomes were also removed.
data processing step	Reads were further filtered to remove PCR duplicates using Picard Tool MarkDuplicates (v2.6.0, https://broadinstitute.github.io/picard/). Accessible chromatin regions (peaks) were called using MACS2 v2.0.10. Default parameters were used except for the following: --keep-dup all -B -- nomodel --SPMR -q 0.05.
data processing step	The signal intensity was calculated as the fold enrichment of the signal per million reads in a sample over a modelled local background using the bdgcmp function in MACS2. We then calculated the maximum signal intensity over every peak for conditions being compared using mapBed –o max and quantile normalized them across samples.
data processing step	The average normalized signal intensity across replicates for each condition was then plotted in PCA. All downstream analyses (e.g. Spearman correlation coefficient analysis) were carried out using Bedtools v2.26.0 (https://bedtools.readthedocs.io/en/latest/) and R 3.4.1 (https://www.r-project.org/). Figures were plotted using ggplot2 (https://ggplot2.tidyverse.org/).
genome build	mm9
processed data files format and content	bedgraph
# For each file listed in the "processed data file" columns of the SAMPLES section, provide additional information below.
PROCESSED DATA FILES
file name	file type	file checksum
180222_KO_2DL_undifferentiated_S6_36bptrimnoadapremoval_FE.bdg	bedgraph
180419_KO_2DL_undifferentiated_S2_36bptrimnoadapremoval_FE.bdg	bedgraph
181002_KO_2DL_undifferentiated_S3_36bptrimnoadapremoval_FE.bdg	bedgraph
180221_KO_6DA_GFP_neg_S7_36bptrimnoadapremoval_FE.bdg	bedgraph
180419_KO_6DA_GFP_neg_S6_36bptrimnoadapremoval_FE.bdg	bedgraph
180419_KO_6DA_GFP_plus_S5_36bptrimnoadapremoval_FE.bdg	bedgraph
181002_KO_6DA_GFP_plus_S5_36bptrimnoadapremoval_FE.bdg	bedgraph
180221_KO_6DA_unsorted_S8_36bptrimnoadapremoval_FE.bdg	bedgraph
180419_KO_6DA_unsorted_S4_36bptrimnoadapremoval_FE.bdg	bedgraph
181002_KO_6DA_unsorted_S4_36bptrimnoadapremoval_FE.bdg	bedgraph
180221_KO_6DL_A395_S12_36bptrimnoadapremoval_FE.bdg	bedgraph
180423_KO_6DL_A395_S6_36bptrimnoadapremoval_FE.bdg	bedgraph
180222_KO_6DL_A395N_S1_36bptrimnoadapremoval_FE.bdg	bedgraph
180424_KO_6DL_A395N_S1_36bptrimnoadapremoval_FE.bdg	bedgraph
180222_KO_6DL_GFP_neg_S10_36bptrimnoadapremoval_FE.bdg	bedgraph
180419_KO_6DL_GFP_neg_S4_36bptrimnoadapremoval_FE.bdg	bedgraph
180222_KO_6DL_GFP_pos_S9_36bptrimnoadapremoval_FE.bdg	bedgraph
180419_KO_6DL_GFP_plus_S3_36bptrimnoadapremoval_FE.bdg	bedgraph
180221_KO_6DL_GSK343_S11_36bptrimnoadapremoval_FE.bdg	bedgraph
180423_KO_6DL_GSK343_S5_36bptrimnoadapremoval_FE.bdg	bedgraph
181002_KO_6DL_GSK343_7_S7_36bptrimnoadapremoval_FE.bdg	bedgraph
181002_KO_6DL_GSK343_1_S1_36bptrimnoadapremoval_FE.bdg	bedgraph
180222_KO_6DL_GSKJ4_S2_36bptrimnoadapremoval_FE.bdg	bedgraph
180424_KO_6DL_GSKJ4_S2_36bptrimnoadapremoval_FE.bdg	bedgraph
180222_KO_6DL_GSKJ5_S3_36bptrimnoadapremoval_FE.bdg	bedgraph
180423_KO_6DL_GSKJ5_S1_36bptrimnoadapremoval_FE.bdg	bedgraph
180221_KO_6DL_UNC1999_S9_36bptrimnoadapremoval_FE.bdg	bedgraph
180419_KO_6DL_UNC1999_S5_36bptrimnoadapremoval_FE.bdg	bedgraph
180221_KO_6DL_UNC2400_S10_36bptrimnoadapremoval_FE.bdg	bedgraph
180419_KO_6DL_UNC2400_S6_36bptrimnoadapremoval_FE.bdg	bedgraph
180222_KO_6DL_unsorted_untreated_S8_36bptrimnoadapremoval_FE.bdg	bedgraph
180419_KO_6DL_unsorted_untreated_S2_36bptrimnoadapremoval_FE.bdg	bedgraph
181002_KO_6DL_unsorted_untreated_S6_36bptrimnoadapremoval_FE.bdg	bedgraph
180222_WT_2DL_undifferentiated_S5_36bptrimnoadapremoval_FE.bdg	bedgraph
180419_WT_2DL_undifferentiated_S1_36bptrimnoadapremoval_FE.bdg	bedgraph
181002_WT_2DL_undifferentiated_S2_36bptrimnoadapremoval_FE.bdg	bedgraph
180221_WT_6DA_S5_36bptrimnoadapremoval_FE.bdg	bedgraph
180419_WT_6DA_S3_36bptrimnoadapremoval_FE.bdg	bedgraph
180222_WT_6DL_S7_36bptrimnoadapremoval_FE.bdg	bedgraph
180419_WT_6DL_S1_36bptrimnoadapremoval_FE.bdg	bedgraph
180222_WT_6DL_A395_S4_36bptrimnoadapremoval_FE.bdg	bedgraph
180424_WT_6DL_A395_S3_36bptrimnoadapremoval_FE.bdg	bedgraph
180221_WT_6DL_A395N_S4_36bptrimnoadapremoval_FE.bdg	bedgraph
180424_WT_6DL_A395N_S4_36bptrimnoadapremoval_FE.bdg	bedgraph
180221_WT_6DL_GSK343_S3_36bptrimnoadapremoval_FE.bdg	bedgraph
180423_WT_6DL_GSK343_S4_36bptrimnoadapremoval_FE.bdg	bedgraph
181002_WT_6DL_GSK343_S8_36bptrimnoadapremoval_FE.bdg	bedgraph
180222_WT_6DL_GSKJ4_S11_36bptrimnoadapremoval_FE.bdg	bedgraph
180424_WT_6DL_GSKJ4_S5_36bptrimnoadapremoval_FE.bdg	bedgraph
180222_WT_6DL_GSKJ5_S12_36bptrimnoadapremoval_FE.bdg	bedgraph
180424_WT_6DL_GSKJ5_S6_36bptrimnoadapremoval_FE.bdg	bedgraph
180221_WT_6DL_UNC1999_S1_36bptrimnoadapremoval_FE.bdg	bedgraph
180423_WT_6DL_UNC1999_S2_36bptrimnoadapremoval_FE.bdg	bedgraph
180221_WT_6DL_UNC2400_S2_36bptrimnoadapremoval_FE.bdg	bedgraph
180423_WT_6DL_UNC2400_S3_36bptrimnoadapremoval_FE.bdg	bedgraph
# For each file listed in the "raw file" columns of the SAMPLES section, provide additional information below.
RAW FILES
file name	file type	file checksum	instrument model	read length	single or paired-end
180222_KO_2DL_undifferentiated_S6_L001_R1_001.fastq.gz	fastq		Illumina NextSeq 500	75	single
180419_KO_2DL_undifferentiated_S2_L001_R1_001.fastq.gz	fastq		Illumina NextSeq 500	75	single
181002_KO_2DL_undifferentiated_S3_L001_R1_001.fastq.gz	fastq		Illumina NextSeq 500	75	single
180221_KO_6DA_GFP_neg_S7_L001_R1_001.fastq.gz	fastq		Illumina NextSeq 500	75	single
180419_KO_6DA_GFP_neg_S6_L001_R1_001.fastq.gz	fastq		Illumina NextSeq 500	75	single
180221_KO_6DA_GFP_pos_S6_L001_R1_001.fastq.gz	fastq		Illumina NextSeq 500	75	single
180419_KO_6DA_GFP_plus_S5_L001_R1_001.fastq.gz	fastq		Illumina NextSeq 500	75	single
181002_KO_6DA_GFP_plus_S5_L001_R1_001.fastq.gz	fastq		Illumina NextSeq 500	75	single
180221_KO_6DA_unsorted_S8_L001_R1_001.fastq.gz	fastq		Illumina NextSeq 500	75	single
180419_KO_6DA_unsorted_S4_L001_R1_001.fastq.gz	fastq		Illumina NextSeq 500	75	single
181002_KO_6DA_unsorted_S4_L001_R1_001.fastq.gz	fastq		Illumina NextSeq 500	75	single
180221_KO_6DL_A395_S12_L001_R1_001.fastq.gz	fastq		Illumina NextSeq 500	75	single
180423_KO_6DL_A395_S6_L001_R1_001.fastq.gz	fastq		Illumina NextSeq 500	75	single
180222_KO_6DL_A395N_S1_L001_R1_001.fastq.gz	fastq		Illumina NextSeq 500	75	single
180424_KO_6DL_A395N_S1_L001_R1_001.fastq.gz	fastq		Illumina NextSeq 500	75	single
180222_KO_6DL_GFP_neg_S10_L001_R1_001.fastq.gz	fastq		Illumina NextSeq 500	75	single
180419_KO_6DL_GFP_neg_S4_L001_R1_001.fastq.gz	fastq		Illumina NextSeq 500	75	single
180222_KO_6DL_GFP_pos_S9_L001_R1_001.fastq.gz	fastq		Illumina NextSeq 500	75	single
180419_KO_6DL_GFP_plus_S3_L001_R1_001.fastq.gz	fastq		Illumina NextSeq 500	75	single
180221_KO_6DL_GSK343_S11_L001_R1_001.fastq.gz	fastq		Illumina NextSeq 500	75	single
180423_KO_6DL_GSK343_S5_L001_R1_001.fastq.gz	fastq		Illumina NextSeq 500	75	single
181002_KO_6DL_GSK343_7_S7_L001_R1_001.fastq.gz	fastq		Illumina NextSeq 500	75	single
181002_KO_6DL_GSK343_1_S1_L001_R1_001.fastq.gz	fastq		Illumina NextSeq 500	75	single
180222_KO_6DL_GSKJ4_S2_L001_R1_001.fastq.gz	fastq		Illumina NextSeq 500	75	single
180424_KO_6DL_GSKJ4_S2_L001_R1_001.fastq.gz	fastq		Illumina NextSeq 500	75	single
180222_KO_6DL_GSKJ5_S3_L001_R1_001.fastq.gz	fastq		Illumina NextSeq 500	75	single
180423_KO_6DL_GSKJ5_S1_L001_R1_001.fastq.gz	fastq		Illumina NextSeq 500	75	single
180221_KO_6DL_UNC1999_S9_L001_R1_001.fastq.gz	fastq		Illumina NextSeq 500	75	single
180419_KO_6DL_UNC1999_S5_L001_R1_001.fastq.gz	fastq		Illumina NextSeq 500	75	single
180221_KO_6DL_UNC2400_S10_L001_R1_001.fastq.gz	fastq		Illumina NextSeq 500	75	single
180419_KO_6DL_UNC2400_S6_L001_R1_001.fastq.gz	fastq		Illumina NextSeq 500	75	single
180222_KO_6DL_unsorted_untreated_S8_L001_R1_001.fastq.gz	fastq		Illumina NextSeq 500	75	single
180419_KO_6DL_unsorted_untreated_S2_L001_R1_001.fastq.gz	fastq		Illumina NextSeq 500	75	single
181002_KO_6DL_unsorted_untreated_S6_L001_R1_001.fastq.gz	fastq		Illumina NextSeq 500	75	single
180222_WT_2DL_undifferentiated_S5_L001_R1_001.fastq.gz	fastq		Illumina NextSeq 500	75	single
180419_WT_2DL_undifferentiated_S1_L001_R1_001.fastq.gz	fastq		Illumina NextSeq 500	75	single
181002_WT_2DL_undifferentiated_S2_L001_R1_001.fastq.gz	fastq		Illumina NextSeq 500	75	single
180221_WT_6DA_S5_L001_R1_001.fastq.gz	fastq		Illumina NextSeq 500	75	single
180419_WT_6DA_S3_L001_R1_001.fastq.gz	fastq		Illumina NextSeq 500	75	single
180222_WT_6DL_S7_L001_R1_001.fastq.gz	fastq		Illumina NextSeq 500	75	single
180419_WT_6DL_S1_L001_R1_001.fastq.gz	fastq		Illumina NextSeq 500	75	single
180222_WT_6DL_A395_S4_L001_R1_001.fastq.gz	fastq		Illumina NextSeq 500	75	single
180424_WT_6DL_A395_S3_L001_R1_001.fastq.gz	fastq		Illumina NextSeq 500	75	single
180221_WT_6DL_A395N_S4_L001_R1_001.fastq.gz	fastq		Illumina NextSeq 500	75	single
180424_WT_6DL_A395N_S4_L001_R1_001.fastq.gz	fastq		Illumina NextSeq 500	75	single
180221_WT_6DL_GSK343_S3_L001_R1_001.fastq.gz	fastq		Illumina NextSeq 500	75	single
180423_WT_6DL_GSK343_S4_L001_R1_001.fastq.gz	fastq		Illumina NextSeq 500	75	single
181002_WT_6DL_GSK343_S8_L001_R1_001.fastq.gz	fastq		Illumina NextSeq 500	75	single
180222_WT_6DL_GSKJ4_S11_L001_R1_001.fastq.gz	fastq		Illumina NextSeq 500	75	single
180424_WT_6DL_GSKJ4_S5_L001_R1_001.fastq.gz	fastq		Illumina NextSeq 500	75	single
180222_WT_6DL_GSKJ5_S12_L001_R1_001.fastq.gz	fastq		Illumina NextSeq 500	75	single
180424_WT_6DL_GSKJ5_S6_L001_R1_001.fastq.gz	fastq		Illumina NextSeq 500	75	single
180221_WT_6DL_UNC1999_S1_L001_R1_001.fastq.gz	fastq		Illumina NextSeq 500	75	single
180423_WT_6DL_UNC1999_S2_L001_R1_001.fastq.gz	fastq		Illumina NextSeq 500	75	single
180221_WT_6DL_UNC2400_S2_L001_R1_001.fastq.gz	fastq		Illumina NextSeq 500	75	single
180423_WT_6DL_UNC2400_S3_L001_R1_001.fastq.gz	fastq		Illumina NextSeq 500	75	single
180222_KO_2DL_undifferentiated_S6_L002_R1_001.fastq.gz	fastq		Illumina NextSeq 500	75	single
180419_KO_2DL_undifferentiated_S2_L002_R1_001.fastq.gz	fastq		Illumina NextSeq 500	75	single
181002_KO_2DL_undifferentiated_S3_L002_R1_001.fastq.gz	fastq		Illumina NextSeq 500	75	single
180221_KO_6DA_GFP_neg_S7_L002_R1_001.fastq.gz	fastq		Illumina NextSeq 500	75	single
180419_KO_6DA_GFP_neg_S6_L002_R1_001.fastq.gz	fastq		Illumina NextSeq 500	75	single
180221_KO_6DA_GFP_pos_S6_L002_R1_001.fastq.gz	fastq		Illumina NextSeq 500	75	single
180419_KO_6DA_GFP_plus_S5_L002_R1_001.fastq.gz	fastq		Illumina NextSeq 500	75	single
181002_KO_6DA_GFP_plus_S5_L002_R1_001.fastq.gz	fastq		Illumina NextSeq 500	75	single
180221_KO_6DA_unsorted_S8_L002_R1_001.fastq.gz	fastq		Illumina NextSeq 500	75	single
180419_KO_6DA_unsorted_S4_L002_R1_001.fastq.gz	fastq		Illumina NextSeq 500	75	single
181002_KO_6DA_unsorted_S4_L002_R1_001.fastq.gz	fastq		Illumina NextSeq 500	75	single
180221_KO_6DL_A395_S12_L002_R1_001.fastq.gz	fastq		Illumina NextSeq 500	75	single
180423_KO_6DL_A395_S6_L002_R1_001.fastq.gz	fastq		Illumina NextSeq 500	75	single
180222_KO_6DL_A395N_S1_L002_R1_001.fastq.gz	fastq		Illumina NextSeq 500	75	single
180424_KO_6DL_A395N_S1_L002_R1_001.fastq.gz	fastq		Illumina NextSeq 500	75	single
180222_KO_6DL_GFP_neg_S10_L002_R1_001.fastq.gz	fastq		Illumina NextSeq 500	75	single
180419_KO_6DL_GFP_neg_S4_L002_R1_001.fastq.gz	fastq		Illumina NextSeq 500	75	single
180222_KO_6DL_GFP_pos_S9_L002_R1_001.fastq.gz	fastq		Illumina NextSeq 500	75	single
180419_KO_6DL_GFP_plus_S3_L002_R1_001.fastq.gz	fastq		Illumina NextSeq 500	75	single
180221_KO_6DL_GSK343_S11_L002_R1_001.fastq.gz	fastq		Illumina NextSeq 500	75	single
180423_KO_6DL_GSK343_S5_L002_R1_001.fastq.gz	fastq		Illumina NextSeq 500	75	single
181002_KO_6DL_GSK343_7_S7_L002_R1_001.fastq.gz	fastq		Illumina NextSeq 500	75	single
181002_KO_6DL_GSK343_1_S1_L002_R1_001.fastq.gz	fastq		Illumina NextSeq 500	75	single
180222_KO_6DL_GSKJ4_S2_L002_R1_001.fastq.gz	fastq		Illumina NextSeq 500	75	single
180424_KO_6DL_GSKJ4_S2_L002_R1_001.fastq.gz	fastq		Illumina NextSeq 500	75	single
180222_KO_6DL_GSKJ5_S3_L002_R1_001.fastq.gz	fastq		Illumina NextSeq 500	75	single
180423_KO_6DL_GSKJ5_S1_L002_R1_001.fastq.gz	fastq		Illumina NextSeq 500	75	single
180221_KO_6DL_UNC1999_S9_L002_R1_001.fastq.gz	fastq		Illumina NextSeq 500	75	single
180419_KO_6DL_UNC1999_S5_L002_R1_001.fastq.gz	fastq		Illumina NextSeq 500	75	single
180221_KO_6DL_UNC2400_S10_L002_R1_001.fastq.gz	fastq		Illumina NextSeq 500	75	single
180419_KO_6DL_UNC2400_S6_L002_R1_001.fastq.gz	fastq		Illumina NextSeq 500	75	single
180222_KO_6DL_unsorted_untreated_S8_L002_R1_001.fastq.gz	fastq		Illumina NextSeq 500	75	single
180419_KO_6DL_unsorted_untreated_S2_L002_R1_001.fastq.gz	fastq		Illumina NextSeq 500	75	single
181002_KO_6DL_unsorted_untreated_S6_L002_R1_001.fastq.gz	fastq		Illumina NextSeq 500	75	single
180222_WT_2DL_undifferentiated_S5_L002_R1_001.fastq.gz	fastq		Illumina NextSeq 500	75	single
180419_WT_2DL_undifferentiated_S1_L002_R1_001.fastq.gz	fastq		Illumina NextSeq 500	75	single
181002_WT_2DL_undifferentiated_S2_L002_R1_001.fastq.gz	fastq		Illumina NextSeq 500	75	single
180221_WT_6DA_S5_L002_R1_001.fastq.gz	fastq		Illumina NextSeq 500	75	single
180419_WT_6DA_S3_L002_R1_001.fastq.gz	fastq		Illumina NextSeq 500	75	single
180222_WT_6DL_S7_L002_R1_001.fastq.gz	fastq		Illumina NextSeq 500	75	single
180419_WT_6DL_S1_L002_R1_001.fastq.gz	fastq		Illumina NextSeq 500	75	single
180222_WT_6DL_A395_S4_L002_R1_001.fastq.gz	fastq		Illumina NextSeq 500	75	single
180424_WT_6DL_A395_S3_L002_R1_001.fastq.gz	fastq		Illumina NextSeq 500	75	single
180221_WT_6DL_A395N_S4_L002_R1_001.fastq.gz	fastq		Illumina NextSeq 500	75	single
180424_WT_6DL_A395N_S4_L002_R1_001.fastq.gz	fastq		Illumina NextSeq 500	75	single
180221_WT_6DL_GSK343_S3_L002_R1_001.fastq.gz	fastq		Illumina NextSeq 500	75	single
180423_WT_6DL_GSK343_S4_L002_R1_001.fastq.gz	fastq		Illumina NextSeq 500	75	single
181002_WT_6DL_GSK343_S8_L002_R1_001.fastq.gz	fastq		Illumina NextSeq 500	75	single
180222_WT_6DL_GSKJ4_S11_L002_R1_001.fastq.gz	fastq		Illumina NextSeq 500	75	single
180424_WT_6DL_GSKJ4_S5_L002_R1_001.fastq.gz	fastq		Illumina NextSeq 500	75	single
180222_WT_6DL_GSKJ5_S12_L002_R1_001.fastq.gz	fastq		Illumina NextSeq 500	75	single
180424_WT_6DL_GSKJ5_S6_L002_R1_001.fastq.gz	fastq		Illumina NextSeq 500	75	single
180221_WT_6DL_UNC1999_S1_L002_R1_001.fastq.gz	fastq		Illumina NextSeq 500	75	single
180423_WT_6DL_UNC1999_S2_L002_R1_001.fastq.gz	fastq		Illumina NextSeq 500	75	single
180221_WT_6DL_UNC2400_S2_L002_R1_001.fastq.gz	fastq		Illumina NextSeq 500	75	single
180423_WT_6DL_UNC2400_S3_L002_R1_001.fastq.gz	fastq		Illumina NextSeq 500	75	single
180222_KO_2DL_undifferentiated_S6_L003_R1_001.fastq.gz	fastq		Illumina NextSeq 500	75	single
180419_KO_2DL_undifferentiated_S2_L003_R1_001.fastq.gz	fastq		Illumina NextSeq 500	75	single
181002_KO_2DL_undifferentiated_S3_L003_R1_001.fastq.gz	fastq		Illumina NextSeq 500	75	single
180221_KO_6DA_GFP_neg_S7_L003_R1_001.fastq.gz	fastq		Illumina NextSeq 500	75	single
180419_KO_6DA_GFP_neg_S6_L003_R1_001.fastq.gz	fastq		Illumina NextSeq 500	75	single
180221_KO_6DA_GFP_pos_S6_L003_R1_001.fastq.gz	fastq		Illumina NextSeq 500	75	single
180419_KO_6DA_GFP_plus_S5_L003_R1_001.fastq.gz	fastq		Illumina NextSeq 500	75	single
181002_KO_6DA_GFP_plus_S5_L003_R1_001.fastq.gz	fastq		Illumina NextSeq 500	75	single
180221_KO_6DA_unsorted_S8_L003_R1_001.fastq.gz	fastq		Illumina NextSeq 500	75	single
180419_KO_6DA_unsorted_S4_L003_R1_001.fastq.gz	fastq		Illumina NextSeq 500	75	single
181002_KO_6DA_unsorted_S4_L003_R1_001.fastq.gz	fastq		Illumina NextSeq 500	75	single
180221_KO_6DL_A395_S12_L003_R1_001.fastq.gz	fastq		Illumina NextSeq 500	75	single
180423_KO_6DL_A395_S6_L003_R1_001.fastq.gz	fastq		Illumina NextSeq 500	75	single
180222_KO_6DL_A395N_S1_L003_R1_001.fastq.gz	fastq		Illumina NextSeq 500	75	single
180424_KO_6DL_A395N_S1_L003_R1_001.fastq.gz	fastq		Illumina NextSeq 500	75	single
180222_KO_6DL_GFP_neg_S10_L003_R1_001.fastq.gz	fastq		Illumina NextSeq 500	75	single
180419_KO_6DL_GFP_neg_S4_L003_R1_001.fastq.gz	fastq		Illumina NextSeq 500	75	single
180222_KO_6DL_GFP_pos_S9_L003_R1_001.fastq.gz	fastq		Illumina NextSeq 500	75	single
180419_KO_6DL_GFP_plus_S3_L003_R1_001.fastq.gz	fastq		Illumina NextSeq 500	75	single
180221_KO_6DL_GSK343_S11_L003_R1_001.fastq.gz	fastq		Illumina NextSeq 500	75	single
180423_KO_6DL_GSK343_S5_L003_R1_001.fastq.gz	fastq		Illumina NextSeq 500	75	single
181002_KO_6DL_GSK343_7_S7_L003_R1_001.fastq.gz	fastq		Illumina NextSeq 500	75	single
181002_KO_6DL_GSK343_1_S1_L003_R1_001.fastq.gz	fastq		Illumina NextSeq 500	75	single
180222_KO_6DL_GSKJ4_S2_L003_R1_001.fastq.gz	fastq		Illumina NextSeq 500	75	single
180424_KO_6DL_GSKJ4_S2_L003_R1_001.fastq.gz	fastq		Illumina NextSeq 500	75	single
180222_KO_6DL_GSKJ5_S3_L003_R1_001.fastq.gz	fastq		Illumina NextSeq 500	75	single
180423_KO_6DL_GSKJ5_S1_L003_R1_001.fastq.gz	fastq		Illumina NextSeq 500	75	single
180221_KO_6DL_UNC1999_S9_L003_R1_001.fastq.gz	fastq		Illumina NextSeq 500	75	single
180419_KO_6DL_UNC1999_S5_L003_R1_001.fastq.gz	fastq		Illumina NextSeq 500	75	single
180221_KO_6DL_UNC2400_S10_L003_R1_001.fastq.gz	fastq		Illumina NextSeq 500	75	single
180419_KO_6DL_UNC2400_S6_L003_R1_001.fastq.gz	fastq		Illumina NextSeq 500	75	single
180222_KO_6DL_unsorted_untreated_S8_L003_R1_001.fastq.gz	fastq		Illumina NextSeq 500	75	single
180419_KO_6DL_unsorted_untreated_S2_L003_R1_001.fastq.gz	fastq		Illumina NextSeq 500	75	single
181002_KO_6DL_unsorted_untreated_S6_L003_R1_001.fastq.gz	fastq		Illumina NextSeq 500	75	single
180222_WT_2DL_undifferentiated_S5_L003_R1_001.fastq.gz	fastq		Illumina NextSeq 500	75	single
180419_WT_2DL_undifferentiated_S1_L003_R1_001.fastq.gz	fastq		Illumina NextSeq 500	75	single
181002_WT_2DL_undifferentiated_S2_L003_R1_001.fastq.gz	fastq		Illumina NextSeq 500	75	single
180221_WT_6DA_S5_L003_R1_001.fastq.gz	fastq		Illumina NextSeq 500	75	single
180419_WT_6DA_S3_L003_R1_001.fastq.gz	fastq		Illumina NextSeq 500	75	single
180222_WT_6DL_S7_L003_R1_001.fastq.gz	fastq		Illumina NextSeq 500	75	single
180419_WT_6DL_S1_L003_R1_001.fastq.gz	fastq		Illumina NextSeq 500	75	single
180222_WT_6DL_A395_S4_L003_R1_001.fastq.gz	fastq		Illumina NextSeq 500	75	single
180424_WT_6DL_A395_S3_L003_R1_001.fastq.gz	fastq		Illumina NextSeq 500	75	single
180221_WT_6DL_A395N_S4_L003_R1_001.fastq.gz	fastq		Illumina NextSeq 500	75	single
180424_WT_6DL_A395N_S4_L003_R1_001.fastq.gz	fastq		Illumina NextSeq 500	75	single
180221_WT_6DL_GSK343_S3_L003_R1_001.fastq.gz	fastq		Illumina NextSeq 500	75	single
180423_WT_6DL_GSK343_S4_L003_R1_001.fastq.gz	fastq		Illumina NextSeq 500	75	single
181002_WT_6DL_GSK343_S8_L003_R1_001.fastq.gz	fastq		Illumina NextSeq 500	75	single
180222_WT_6DL_GSKJ4_S11_L003_R1_001.fastq.gz	fastq		Illumina NextSeq 500	75	single
180424_WT_6DL_GSKJ4_S5_L003_R1_001.fastq.gz	fastq		Illumina NextSeq 500	75	single
180222_WT_6DL_GSKJ5_S12_L003_R1_001.fastq.gz	fastq		Illumina NextSeq 500	75	single
180424_WT_6DL_GSKJ5_S6_L003_R1_001.fastq.gz	fastq		Illumina NextSeq 500	75	single
180221_WT_6DL_UNC1999_S1_L003_R1_001.fastq.gz	fastq		Illumina NextSeq 500	75	single
180423_WT_6DL_UNC1999_S2_L003_R1_001.fastq.gz	fastq		Illumina NextSeq 500	75	single
180221_WT_6DL_UNC2400_S2_L003_R1_001.fastq.gz	fastq		Illumina NextSeq 500	75	single
180423_WT_6DL_UNC2400_S3_L003_R1_001.fastq.gz	fastq		Illumina NextSeq 500	75	single
180222_KO_2DL_undifferentiated_S6_L004_R1_001.fastq.gz	fastq		Illumina NextSeq 500	75	single
180419_KO_2DL_undifferentiated_S2_L004_R1_001.fastq.gz	fastq		Illumina NextSeq 500	75	single
181002_KO_2DL_undifferentiated_S3_L004_R1_001.fastq.gz	fastq		Illumina NextSeq 500	75	single
180221_KO_6DA_GFP_neg_S7_L004_R1_001.fastq.gz	fastq		Illumina NextSeq 500	75	single
180419_KO_6DA_GFP_neg_S6_L004_R1_001.fastq.gz	fastq		Illumina NextSeq 500	75	single
180221_KO_6DA_GFP_pos_S6_L004_R1_001.fastq.gz	fastq		Illumina NextSeq 500	75	single
180419_KO_6DA_GFP_plus_S5_L004_R1_001.fastq.gz	fastq		Illumina NextSeq 500	75	single
181002_KO_6DA_GFP_plus_S5_L004_R1_001.fastq.gz	fastq		Illumina NextSeq 500	75	single
180221_KO_6DA_unsorted_S8_L004_R1_001.fastq.gz	fastq		Illumina NextSeq 500	75	single
180419_KO_6DA_unsorted_S4_L004_R1_001.fastq.gz	fastq		Illumina NextSeq 500	75	single
181002_KO_6DA_unsorted_S4_L004_R1_001.fastq.gz	fastq		Illumina NextSeq 500	75	single
180221_KO_6DL_A395_S12_L004_R1_001.fastq.gz	fastq		Illumina NextSeq 500	75	single
180423_KO_6DL_A395_S6_L004_R1_001.fastq.gz	fastq		Illumina NextSeq 500	75	single
180222_KO_6DL_A395N_S1_L004_R1_001.fastq.gz	fastq		Illumina NextSeq 500	75	single
180424_KO_6DL_A395N_S1_L004_R1_001.fastq.gz	fastq		Illumina NextSeq 500	75	single
180222_KO_6DL_GFP_neg_S10_L004_R1_001.fastq.gz	fastq		Illumina NextSeq 500	75	single
180419_KO_6DL_GFP_neg_S4_L004_R1_001.fastq.gz	fastq		Illumina NextSeq 500	75	single
180222_KO_6DL_GFP_pos_S9_L004_R1_001.fastq.gz	fastq		Illumina NextSeq 500	75	single
180419_KO_6DL_GFP_plus_S3_L004_R1_001.fastq.gz	fastq		Illumina NextSeq 500	75	single
180221_KO_6DL_GSK343_S11_L004_R1_001.fastq.gz	fastq		Illumina NextSeq 500	75	single
180423_KO_6DL_GSK343_S5_L004_R1_001.fastq.gz	fastq		Illumina NextSeq 500	75	single
181002_KO_6DL_GSK343_7_S7_L004_R1_001.fastq.gz	fastq		Illumina NextSeq 500	75	single
181002_KO_6DL_GSK343_1_S1_L004_R1_001.fastq.gz	fastq		Illumina NextSeq 500	75	single
180222_KO_6DL_GSKJ4_S2_L004_R1_001.fastq.gz	fastq		Illumina NextSeq 500	75	single
180424_KO_6DL_GSKJ4_S2_L004_R1_001.fastq.gz	fastq		Illumina NextSeq 500	75	single
180222_KO_6DL_GSKJ5_S3_L004_R1_001.fastq.gz	fastq		Illumina NextSeq 500	75	single
180423_KO_6DL_GSKJ5_S1_L004_R1_001.fastq.gz	fastq		Illumina NextSeq 500	75	single
180221_KO_6DL_UNC1999_S9_L004_R1_001.fastq.gz	fastq		Illumina NextSeq 500	75	single
180419_KO_6DL_UNC1999_S5_L004_R1_001.fastq.gz	fastq		Illumina NextSeq 500	75	single
180221_KO_6DL_UNC2400_S10_L004_R1_001.fastq.gz	fastq		Illumina NextSeq 500	75	single
180419_KO_6DL_UNC2400_S6_L004_R1_001.fastq.gz	fastq		Illumina NextSeq 500	75	single
180222_KO_6DL_unsorted_untreated_S8_L004_R1_001.fastq.gz	fastq		Illumina NextSeq 500	75	single
180419_KO_6DL_unsorted_untreated_S2_L004_R1_001.fastq.gz	fastq		Illumina NextSeq 500	75	single
181002_KO_6DL_unsorted_untreated_S6_L004_R1_001.fastq.gz	fastq		Illumina NextSeq 500	75	single
180222_WT_2DL_undifferentiated_S5_L004_R1_001.fastq.gz	fastq		Illumina NextSeq 500	75	single
180419_WT_2DL_undifferentiated_S1_L004_R1_001.fastq.gz	fastq		Illumina NextSeq 500	75	single
181002_WT_2DL_undifferentiated_S2_L004_R1_001.fastq.gz	fastq		Illumina NextSeq 500	75	single
180221_WT_6DA_S5_L004_R1_001.fastq.gz	fastq		Illumina NextSeq 500	75	single
180419_WT_6DA_S3_L004_R1_001.fastq.gz	fastq		Illumina NextSeq 500	75	single
180222_WT_6DL_S7_L004_R1_001.fastq.gz	fastq		Illumina NextSeq 500	75	single
180419_WT_6DL_S1_L004_R1_001.fastq.gz	fastq		Illumina NextSeq 500	75	single
180222_WT_6DL_A395_S4_L004_R1_001.fastq.gz	fastq		Illumina NextSeq 500	75	single
180424_WT_6DL_A395_S3_L004_R1_001.fastq.gz	fastq		Illumina NextSeq 500	75	single
180221_WT_6DL_A395N_S4_L004_R1_001.fastq.gz	fastq		Illumina NextSeq 500	75	single
180424_WT_6DL_A395N_S4_L004_R1_001.fastq.gz	fastq		Illumina NextSeq 500	75	single
180221_WT_6DL_GSK343_S3_L004_R1_001.fastq.gz	fastq		Illumina NextSeq 500	75	single
180423_WT_6DL_GSK343_S4_L004_R1_001.fastq.gz	fastq		Illumina NextSeq 500	75	single
181002_WT_6DL_GSK343_S8_L004_R1_001.fastq.gz	fastq		Illumina NextSeq 500	75	single
180222_WT_6DL_GSKJ4_S11_L004_R1_001.fastq.gz	fastq		Illumina NextSeq 500	75	single
180424_WT_6DL_GSKJ4_S5_L004_R1_001.fastq.gz	fastq		Illumina NextSeq 500	75	single
180222_WT_6DL_GSKJ5_S12_L004_R1_001.fastq.gz	fastq		Illumina NextSeq 500	75	single
180424_WT_6DL_GSKJ5_S6_L004_R1_001.fastq.gz	fastq		Illumina NextSeq 500	75	single
180221_WT_6DL_UNC1999_S1_L004_R1_001.fastq.gz	fastq		Illumina NextSeq 500	75	single
180423_WT_6DL_UNC1999_S2_L004_R1_001.fastq.gz	fastq		Illumina NextSeq 500	75	single
180221_WT_6DL_UNC2400_S2_L004_R1_001.fastq.gz	fastq		Illumina NextSeq 500	75	single
180423_WT_6DL_UNC2400_S3_L004_R1_001.fastq.gz	fastq		Illumina NextSeq 500	75	single
# For paired-end experiments, list the 2 associated raw files, and provide average insert size and standard deviation, if known. For SOLiD experiments, list the 4 file names (include "file name 3" and "file name 4" columns).
PAIRED-END EXPERIMENTS
file name 1	file name 2	average insert size	standard deviation
