# Supplementary material for: Telomere dysfunction cooperates with epigenetic alterations to impair murine embryonic stem cell fate commitment
Source: eLife. 2020 Apr 16;9:e47333. doi: 10.7554/eLife.47333 (PMC7192583; doi:10.7554/eLife.47333)
Supplement: Figure 4—source data 2. [file elife-47333-fig4-data2.xlsx]

## Sheet: Sheet1
Supplement Table 1_related to ATAC-seq data
Group	Treatment	FileName	SampleName	Exp set	Raw Reads Summ	Aligned Reads	Alignment %	Filtered Reads	% of reads filtered	Final deduplicated reads	Duplication Rate	Peaks (Q value 0.05)
Tert-/-	2DL_undifferentiated	180222_KO_2DL_undifferentiated_S6	KO.2DL_undifferentiated	1	30473921	29327191	0.96237	21433986	0.269143	17356156	0.190251	51986
Tert-/-	2DL_undifferentiated	180419_KO_2DL_undifferentiated_S2	KO.2DL_undifferentiated	2	137994216	134306485	0.973276	81204768	0.395377	63131685	0.222562	121905
Tert-/-	2DL_undifferentiated	181002_KO_2DL_undifferentiated_S3	KO.2DL_undifferentiated	3	60094409	58541532	0.974159	40727265	0.304301	32927227	0.191519	78683
Tert-/-	6DA_GFP_negative	180221_KO_6DA_GFP_S7	KO.6DA_GFP-	1	27880341	26885146	0.964305	19481056	0.275397	16649698	0.145339	66351
Tert-/-	6DA_GFP_negative	180419_KO_6DA_GFP_S6	KO.6DA_GFP-	2	64271672	62467783	0.971933	41719502	0.332144	31725267	0.239558	70105
Tert-/-	6DA_GFP_pos	180221_KO_6DA_GFP_pos_S6	KO.6DA_GFP_pos	1	27416637	26393345	0.962676	20439605	0.225577	18913737	0.0746525	10788
Tert-/-	6DA_GFP_pos	180419_KO_6DA_GFP_plus_S5	KO.6DA_GFP_pos	2	91432233	88917803	0.9725	60033264	0.324845	43067029	0.282614	85918
Tert-/-	6DA_GFP_pos	181002_KO_6DA_GFP_plus_S5	KO.6DA_GFP_pos	3	66082906	64298440	0.972997	48637803	0.243562	32894748	0.323679	64427
Tert-/-	6DA_unsorted	180221_KO_6DA_unsorted_S8	KO.6DA_unsorted	1	26554642	25656651	0.966183	18485986	0.279486	15565389	0.15799	70356
Tert-/-	6DA_unsorted	180419_KO_6DA_unsorted_S4	KO.6DA_unsorted	2	94335517	91810824	0.973237	61574496	0.329333	42115117	0.31603	79450
Tert-/-	6DA_unsorted	181002_KO_6DA_unsorted_S4	KO.6DA_unsorted	3	53059667	51675300	0.973909	37937959	0.26584	27904679	0.264465	39875
Tert-/-	6DL_A395	180221_KO_6DL_A395_S12	KO.6DL_A395	1	48882129	47268318	0.966986	33390182	0.293603	28117860	0.1579	80711
Tert-/-	6DL_A395	180423_KO_6DL_A395_S6	KO.6DL_A395	2	63801124	61353926	0.961643	29665285	0.516489	24939488	0.159304	91392
Tert-/-	6DL_A395N	180222_KO_6DL_A395N_S1	KO.6DL_A395N	1	58339509	55962930	0.959263	40991193	0.26753	30917728	0.245747	79246
Tert-/-	6DL_A395N	180424_KO_6DL_A395N_S1	KO.6DL_A395N	2	79591731	77516395	0.973925	51790161	0.331881	40547167	0.217087	75996
Tert-/-	6DL_GFP_neg	180222_KO_6DL_GFP_neg_S10	KO.6DL_GFP_-	1	30700218	29388428	0.957271	21785626	0.258701	16841846	0.226929	69141
Tert-/-	6DL_GFP_neg	180419_KO_6DL_GFP_neg_S4	KO.6DL_GFP_-	2	91649079	88268078	0.963109	55997108	0.365602	35066872	0.373774	93396
Tert-/-	6DL_GFP_pos	180222_KO_6DL_GFP_pos_S9	KO.6DL_GFP_pos	1	38042078	36631039	0.962908	25768786	0.296531	20995635	0.18523	85643
Tert-/-	6DL_GFP_pos	180419_KO_6DL_GFP_plus_S3	KO.6DL_GFP_pos	2	97639582	94542511	0.968281	49825861	0.472979	40466423	0.187843	114001
Tert-/-	6DL_GSK343	180221_KO_6DL_GSK343_S11	KO.6DL_GSK343	1	19856484	19112739	0.962544	13842710	0.275734	12753610	0.0786768	42746
Tert-/-	6DL_GSK343	180423_KO_6DL_GSK343_S5	KO.6DL_GSK343	2	82573791	79311267	0.96049	35955938	0.546648	30737860	0.145124	95356
Tert-/-	6DL_GSK343	181002_KO_6DL_GSK343_7_S7	KO.6DL_GSK343	3	47957248	46728155	0.974371	31958837	0.316069	21705454	0.320831	42438
Tert-/-	6DL_GSK343	181002_KO_6DL_GSK343_1_S1	KO.6DL_GSK343	3	67925200	66159438	0.974004	48730114	0.263444	35903209	0.263223	53579
Tert-/-	6DL_GSKJ4	180222_KO_6DL_GSKJ4_S2	KO.6DL_GSKJ4	1	43382548	41689909	0.960983	30078287	0.278524	23294885	0.225525	72237
Tert-/-	6DL_GSKJ4	180424_KO_6DL_GSKJ4_S2	KO.6DL_GSKJ4	2	93214594	90934456	0.975539	52452638	0.423182	38638052	0.263373	102779
Tert-/-	6DL_GSKJ5	180222_KO_6DL_GSKJ5_S3	KO.6DL_GSKJ5	1	39253576	37759451	0.961937	25841670	0.315624	21783922	0.157023	89380
Tert-/-	6DL_GSKJ5	180423_KO_6DL_GSKJ5_S1	KO.6DL_GSKJ5	2	61572982	59078722	0.959491	28868589	0.511354	25095309	0.130705	93646
Tert-/-	6DL_UNC1999	180221_KO_6DL_UNC1999_S9	KO.6DL_UNC1999	1	49917299	48249603	0.966591	35919568	0.255547	28773762	0.198939	62093
Tert-/-	6DL_UNC1999	180419_KO_6DL_UNC1999_S5	KO.6DL_UNC1999	2	75220820	72485678	0.963638	39738282	0.451777	32877153	0.172658	96616
Tert-/-	6DL_UNC2400	180221_KO_6DL_UNC2400_S10	KO.6DL_UNC2400	1	34881904	33641227	0.964432	23423811	0.303717	19828117	0.153506	79018
Tert-/-	6DL_UNC2400	180419_KO_6DL_UNC2400_S6	KO.6DL_UNC2400	2	79486201	77150247	0.970612	34224737	0.556388	29580292	0.135704	101862
Tert-/-	6DL_unsorted-untreated	180222_KO_6DL_unsorted_untreated_S8	KO.6DL_unsorted-untreated	1	43396323	41834741	0.964016	29313422	0.299304	23807006	0.187846	84230
Tert-/-	6DL_unsorted-untreated	180419_KO_6DL_unsorted_untreated_S2	KO.6DL_unsorted-untreated	2	86203648	83494885	0.968577	48370898	0.420672	39915314	0.174807	95465
Tert-/-	6DL_unsorted-untreated	181002_KO_6DL_unsorted_untreated_S6	KO.6DL_unsorted-untreated	3	38685703	37636291	0.972873	27247333	0.276036	21499992	0.210932	27405
WT	2DL_undifferentiated	180222_WT_2DL_undifferentiated_S5	WT.2DL_undifferentiated	1	43660680	41982578	0.961565	29525790	0.296713	24060032	0.185118	56346
WT	2DL_undifferentiated	180419_WT_2DL_undifferentiated_S1	WT.2DL_undifferentiated	2	90026102	87596298	0.97301	52748692	0.397821	42849349	0.18767	93374
WT	2DL_undifferentiated	181002_WT_2DL_undifferentiated_S2	WT.2DL_undifferentiated	3	50433331	49190460	0.975356	31581333	0.357978	23540641	0.254603	75153
WT	6DA	180221_WT_6DA_S5	WT.6DA	1	42241533	40675886	0.962936	26881552	0.339128	22169341	0.175295	45170
WT	6DA	180419_WT_6DA_S3	WT.6DA	2	104004297	101029614	0.971398	66903436	0.337784	55429374	0.171502	58877
WT	6DL	180222_WT_6DL_S7	WT.6DL	1	34903288	33532998	0.96074	22367882	0.332959	19053106	0.148194	45368
WT	6DL	180419_WT_6DL_S1	WT.6DL	2	110746203	107005517	0.966223	56010045	0.476569	48120230	0.140864	57527
WT	6DL_A395	180222_WT_6DL_A395_S4	WT.6DL_A395	1	48379037	46130318	0.953519	30807721	0.332159	25996500	0.156169	47013
WT	6DL_A395	180424_WT_6DL_A395_S3	WT.6DL_A395	2	105553699	102178124	0.96802	52177617	0.489346	44234513	0.152232	55888
WT	6DL_A395N	180221_WT_6DL_A395N_S4	WT.6DL_A395N	1	33350870	32126080	0.963276	21126711	0.342381	19495617	0.0772053	56362
WT	6DL_A395N	180424_WT_6DL_A395N_S4	WT.6DL_A395N	2	92031064	89231553	0.969581	48620326	0.455122	41672962	0.14289	69455
WT	6DL_GSK343	180221_WT_6DL_GSK343_S3	WT.6DL_GSK343	1	27450197	26252214	0.956358	17993280	0.3146	15162568	0.157321	32069
WT	6DL_GSK343	180423_WT_6DL_GSK343_S4	WT.6DL_GSK343	2	71200298	68069596	0.95603	34604717	0.491627	30229717	0.126428	47532
WT	6DL_GSK343	181002_WT_6DL_GSK343_S8	WT.6DL_GSK343	3	56320778	54576015	0.969021	37643472	0.310256	31573661	0.161245	28274
WT	6DL_GSKJ4	180222_WT_6DL_GSKJ4_S11	WT.6DL_GSKJ4	1	30876246	29525120	0.956241	19140282	0.351729	16954082	0.11422	53439
WT	6DL_GSKJ4	180424_WT_6DL_GSKJ4_S5	WT.6DL_GSKJ4	2	74512794	72578967	0.974047	33961519	0.532075	28751201	0.153418	78793
WT	6DL_GSKJ5	180222_WT_6DL_GSKJ5_S12	WT.6DL_GSKJ5	1	46230545	44300640	0.958255	29117868	0.342721	25279944	0.131806	63264
WT	6DL_GSKJ5	180424_WT_6DL_GSKJ5_S6	WT.6DL_GSKJ5	2	96689639	93993411	0.972115	46623421	0.503971	38680688	0.170359	73526
WT	6DL_UNC1999	180221_WT_6DL_UNC1999_S1	WT.6DL_UNC1999	1	42767606	41041306	0.959635	27849855	0.321419	23833085	0.144229	35846
WT	6DL_UNC1999	180423_WT_6DL_UNC1999_S2	WT.6DL_UNC1999	2	94691315	90590152	0.956689	46386698	0.48795	39893062	0.139989	56983
WT	6DL_UNC2400	180221_WT_6DL_UNC2400_S2	WT.6DL_UNC2400	1	46523892	44795771	0.962855	30364197	0.322164	27644315	0.0895753	59425
WT	6DL_UNC2400	180423_WT_6DL_UNC2400_S3	WT.6DL_UNC2400	2	75734538	72648361	0.95925	37254279	0.487197	32339329	0.13193	75592
This ATAC-seq analysis involved 56 samples across two genotypes (wildtype: WT, and Tert-/-: KO). Treatment groups for each genotype as indicated in the sample name. Samples were prepared on different dates and labeled as experimental sets 1-3.
All treatments contained two biological replicates. Three samples had 3 replicates: KO.2DL_undifferentiated, WT.2DL_undifferentiated, KO.6DL_unsorted-untreated, WT.6DL_GSK343). One sample had 4 biological replicates (KO.6DL_GSK343).
These additional replicates for a subset of samples were included to ensure reproducibility across the 3 experimental sets. Only 1 sample (filename: 180221.KO_6DA_GFP_pos_S6) failed the quality control for ATAC-seq and was not included in further analysis.
The methological steps involved in each column above are described further in the Materials and Methods. Raw (fastq) and processed (.bdg) files associated with these 56 samples are listed in Source Data file 2 and are deposited with the NCBI Gene Expression Omnibus.
