# Supplementary material for: Telomere dysfunction cooperates with epigenetic alterations to impair murine embryonic stem cell fate commitment
Source: eLife. 2020 Apr 16;9:e47333. doi: 10.7554/eLife.47333 (PMC7192583; doi:10.7554/eLife.47333)
Supplement: Figure 4—source data 3. [file elife-47333-fig4-data3.xlsx]

## Sheet: Sheet1
Supplement Table 1_related to ChIP-seq data
Group	Treatment	FileName	FileName	FileName	FileName	SampleName	Exp set	Total no of reads	Total_aligned_reads	Total_reads_after_filtering	Final_filtered_and_deduped_reads	Broad Peaks
Tert-/-	2DL_undifferentiated	190808_A00827_0022_BHFMHKDRXX_Harrington/KO_2DL_n_2_input_S31_L002_R1_001.fastq.gz				KO_2DL_n_2_input	2	26119774	21255815	13834332	12391114
Tert-/-	2DL_undifferentiated	190808_A00827_0022_BHFMHKDRXX_Harrington/KO_2DL_n_2_S1_L001_R1_001.fastq.gz				KO_2DL_n_2	2	35028509	32632243	21297125	11735833	11555
Tert-/-	6DL_DMSO	190808_A00827_0022_BHFMHKDRXX_Harrington/KO_6DL_DMSO_n_2_input_S32_L002_R1_001.fastq.gz				KO_6DL_DMSO_n_2_input	2	25319602	22034592	14741123	13214601
Tert-/-	6DL_DMSO	190808_A00827_0022_BHFMHKDRXX_Harrington/KO_6DL_DMSO_n_2_S2_L001_R1_001.fastq.gz				KO_6DL_DMSO_n_2	2	21984781	20544406	13516964	8471012	12079
Tert-/-	6DL_GSK343	190808_A00827_0022_BHFMHKDRXX_Harrington/KO_6DL_GSK343_n_2_input_S35_L002_R1_001.fastq.gz				KO_6DL_GSK343_n_2_input	2	39683664	35513277	24478761	20974898
Tert-/-	6DL_GSK343	190808_A00827_0022_BHFMHKDRXX_Harrington/KO_6DL_GSK343_n_2_S24_L002_R1_001.fastq.gz	190827_A00827_0029_BHFMWNDRXX_Harrington_Lea/KO_6DL_GSK343_n_2_S69_L002_R1_001.fastq.gz	190913_A00827_0040_BHGH3YDRXX_Harrington/KO_6DL_GSK343_n_2_S8_L001_R1_001.fastq.gz	190913_A00827_0040_BHGH3YDRXX_Harrington/KO_6DL_GSK343_n_2_S8_L002_R1_001.fastq.gz	KO_6DL_GSK343_n_2	2	51426448	44923886	18723252	7326040	15544
Tert-/-	6DL_UNC1999	190808_A00827_0022_BHFMHKDRXX_Harrington/KO_6DL_UNC1999_n_2_input_S33_L002_R1_001.fastq.gz				KO_6DL_UNC1999_n_2_input	2	35188194	30052877	20412721	17698740
Tert-/-	6DL_UNC1999	190808_A00827_0022_BHFMHKDRXX_Harrington/KO_6DL_UNC1999_n_2_S22_L002_R1_001.fastq.gz				KO_6DL_UNC1999_n_2	2	20317381	18463899	10599621	7642192	9481
Tert-/-	6DL_UNC2400	190808_A00827_0022_BHFMHKDRXX_Harrington/KO_6DL_UNC2400_n_2_input_S34_L002_R1_001.fastq.gz				KO_6DL_UNC2400_n_2_input	2	29767103	26934973	18787617	16742996
Tert-/-	6DL_UNC2400	190808_A00827_0022_BHFMHKDRXX_Harrington/KO_6DL_UNC2400_n_2_S23_L002_R1_001.fastq.gz				KO_6DL_UNC2400_n_2	2	29431560	26771778	16069631	9636279	50076
WT	2DL_undifferentiated	190925_A00827_0044_AHGLNWDRXX_Harrington_Aditi__Lea/WT_2D__n_2_input_S3_L002_R1_001.fastq.gz	190808_A00827_0022_BHFMHKDRXX_Harrington/WT_2DL_n_2_input_S13_L001_R1_001.fastq.gz			WT_2DL_n_2_input	2	21287920	16201663	8734613	7258941
WT	2DL_undifferentiated	190808_A00827_0022_BHFMHKDRXX_Harrington/WT_2DL_n_2_S7_L001_R1_001.fastq.gz				WT_2DL_n_2	2	21486704	19201401	14185565	11569387	83
WT	6DL_DMSO	190808_A00827_0022_BHFMHKDRXX_Harrington/WT_6DL_DMSO_n_2_input_S14_L001_R1_001.fastq.gz				WT_6DL_DMSO_n_2_input	2	24846449	22281594	16283671	14096143
WT	6DL_DMSO	190913_A00827_0040_BHGH3YDRXX_Harrington/WT_6DL_DMSO_n_2_S6_L001_R1_001.fastq.gz	190913_A00827_0040_BHGH3YDRXX_Harrington/WT_6DL_DMSO_n_2_S6_L002_R1_001.fastq.gz	190827_A00827_0029_BHFMWNDRXX_Harrington_Lea/WT_6DL_DMSO_n_2_S71_L002_R1_001.fastq.gz	190808_A00827_0022_BHFMHKDRXX_Harrington/WT_6DL_DMSO_n_2_S8_L001_R1_001.fastq.gz	WT_6DL_DMSO_n_2	2	48825040	39731238	16848723	3391849	44277
WT	6DL_GSK343	190808_A00827_0022_BHFMHKDRXX_Harrington/WT_6DL_GSK343_n_2_input_S19_L001_R1_001.fastq.gz				WT_6DL_GSK343_n_2_input	2	21296393	17339848	11798780	10399592
WT	6DL_GSK343	190808_A00827_0022_BHFMHKDRXX_Harrington/WT_6DL_GSK343_n_2_S26_L002_R1_001.fastq.gz				WT_6DL_GSK343_n_2	2	26938970	23567256	8131669	4148106	38104
WT	6DL_UNC1999	190808_A00827_0022_BHFMHKDRXX_Harrington/WT_6DL_UNC1999_n_2_input_S15_L001_R1_001.fastq.gz				WT_6DL_UNC1999_n_2_input	2	21209264	18189397	12923843	11439078
WT	6DL_UNC1999	190913_A00827_0040_BHGH3YDRXX_Harrington/WT_6DL_UNC1999_n_2_S7_L001_R1_001.fastq.gz	190913_A00827_0040_BHGH3YDRXX_Harrington/WT_6DL_UNC1999_n_2_S7_L002_R1_001.fastq.gz	190827_A00827_0029_BHFMWNDRXX_Harrington_Lea/WT_6DL_UNC1999_n_2_S72_L002_R1_001.fastq.gz	190808_A00827_0022_BHFMHKDRXX_Harrington/WT_6DL_UNC1999_n_2_S9_L001_R1_001.fastq.gz	WT_6DL_UNC1999_n_2	2	54996117	16252047	4828661	2562842	50096
WT	6DL_UNC2400	190808_A00827_0022_BHFMHKDRXX_Harrington/WT_6DL_UNC2400_n_2_input_S16_L001_R1_001.fastq.gz				WT_6DL_UNC2400_n_2_input	2	22460614	19373033	13926169	12168488
WT	6DL_UNC2400	190808_A00827_0022_BHFMHKDRXX_Harrington/WT_6DL_UNC2400_n_2_S25_L002_R1_001.fastq.gz	190827_A00827_0029_BHFMWNDRXX_Harrington_Lea/WT_6DL_UNC2400_n_2_S73_L002_R1_001.fastq.gz	190913_A00827_0040_BHGH3YDRXX_Harrington/WT_6DL_UNC2400_n_2_S9_L001_R1_001.fastq.gz	190913_A00827_0040_BHGH3YDRXX_Harrington/WT_6DL_UNC2400_n_2_S9_L002_R1_001.fastq.gz	WT_6DL_UNC2400_n_2	2	63340118	18207260	6448477	2485363	31697
Tert-/-	6DL_DMSO	191120_A00827_0082_AHH7C7DRXX_Harrington/KO_6DL_DMSO_n_3_input_S12_L001_R1_001.fastq.gz	191120_A00827_0082_AHH7C7DRXX_Harrington/KO_6DL_DMSO_n_3_input_S12_L002_R1_001.fastq.gz	191107_A00827_0071_AHH5WHDRXX_Harrington/KO_6DL_DMSO_n_3_input_S17_L001_R1_001.fastq.gz	191107_A00827_0071_AHH5WHDRXX_Harrington/KO_6DL_DMSO_n_3_input_S17_L002_R1_001.fastq.gz	KO_6DL_DMSO_n_3_input	3	33404237	29672444	16212757	11941672
Tert-/-	6DL_DMSO	191107_A00827_0071_AHH5WHDRXX_Harrington/KO_6DL_DMSO_n_3_S2_L001_R1_001.fastq.gz	191120_A00827_0082_AHH7C7DRXX_Harrington/KO_6DL_DMSO_n_3_S2_L001_R1_001.fastq.gz	191107_A00827_0071_AHH5WHDRXX_Harrington/KO_6DL_DMSO_n_3_S2_L002_R1_001.fastq.gz	191120_A00827_0082_AHH7C7DRXX_Harrington/KO_6DL_DMSO_n_3_S2_L002_R1_001.fastq.gz	KO_6DL_DMSO_n_3	3	30932392	25078945	12002426	7879627	9665
Tert-/-	6DL_GSK343	191120_A00827_0082_AHH7C7DRXX_Harrington/KO_6DL_GSK343_n_3_input_S15_L001_R1_001.fastq.gz	191120_A00827_0082_AHH7C7DRXX_Harrington/KO_6DL_GSK343_n_3_input_S15_L002_R1_001.fastq.gz	191107_A00827_0071_AHH5WHDRXX_Harrington/KO_6DL_GSK343_n_3_input_S20_L001_R1_001.fastq.gz	191107_A00827_0071_AHH5WHDRXX_Harrington/KO_6DL_GSK343_n_3_input_S20_L002_R1_001.fastq.gz	KO_6DL_GSK343_n_3_input	3	26216735	23795989	14619049	11837566
Tert-/-	6DL_GSK343	191107_A00827_0071_AHH5WHDRXX_Harrington/KO_6DL_GSK343_n_3_S5_L001_R1_001.fastq.gz	191120_A00827_0082_AHH7C7DRXX_Harrington/KO_6DL_GSK343_n_3_S5_L001_R1_001.fastq.gz	191107_A00827_0071_AHH5WHDRXX_Harrington/KO_6DL_GSK343_n_3_S5_L002_R1_001.fastq.gz	191120_A00827_0082_AHH7C7DRXX_Harrington/KO_6DL_GSK343_n_3_S5_L002_R1_001.fastq.gz	KO_6DL_GSK343_n_3	3	29131676	23191649	10972579	7476777	5907
Tert-/-	6DL_UNC1999	191120_A00827_0082_AHH7C7DRXX_Harrington/KO_6DL_UNC1999_n_3_input_S13_L001_R1_001.fastq.gz	191120_A00827_0082_AHH7C7DRXX_Harrington/KO_6DL_UNC1999_n_3_input_S13_L002_R1_001.fastq.gz	191107_A00827_0071_AHH5WHDRXX_Harrington/KO_6DL_UNC1999_n_3_input_S18_L001_R1_001.fastq.gz	191107_A00827_0071_AHH5WHDRXX_Harrington/KO_6DL_UNC1999_n_3_input_S18_L002_R1_001.fastq.gz	KO_6DL_UNC1999_n_3_input	3	26695058	23637352	13241541	10393061
Tert-/-	6DL_UNC1999	191107_A00827_0071_AHH5WHDRXX_Harrington/KO_6DL_UNC1999_n_3_S3_L001_R1_001.fastq.gz	191120_A00827_0082_AHH7C7DRXX_Harrington/KO_6DL_UNC1999_n_3_S3_L001_R1_001.fastq.gz	191107_A00827_0071_AHH5WHDRXX_Harrington/KO_6DL_UNC1999_n_3_S3_L002_R1_001.fastq.gz	191120_A00827_0082_AHH7C7DRXX_Harrington/KO_6DL_UNC1999_n_3_S3_L002_R1_001.fastq.gz	KO_6DL_UNC1999_n_3	3	30986758	25753277	7196469	5197966	24163
Tert-/-	6DL_UNC2400	191120_A00827_0082_AHH7C7DRXX_Harrington/KO_6DL_UNC2400_n_3_input_S14_L001_R1_001.fastq.gz	191120_A00827_0082_AHH7C7DRXX_Harrington/KO_6DL_UNC2400_n_3_input_S14_L002_R1_001.fastq.gz	191107_A00827_0071_AHH5WHDRXX_Harrington/KO_6DL_UNC2400_n_3_input_S19_L001_R1_001.fastq.gz	191107_A00827_0071_AHH5WHDRXX_Harrington/KO_6DL_UNC2400_n_3_input_S19_L002_R1_001.fastq.gz	KO_6DL_UNC2400_n_3_input	3	30879967	27742138	16358243	12674254
Tert-/-	6DL_UNC2400	191107_A00827_0071_AHH5WHDRXX_Harrington/KO_6DL_UNC2400_n_3_S4_L001_R1_001.fastq.gz	191120_A00827_0082_AHH7C7DRXX_Harrington/KO_6DL_UNC2400_n_3_S4_L001_R1_001.fastq.gz	191107_A00827_0071_AHH5WHDRXX_Harrington/KO_6DL_UNC2400_n_3_S4_L002_R1_001.fastq.gz	191120_A00827_0082_AHH7C7DRXX_Harrington/KO_6DL_UNC2400_n_3_S4_L002_R1_001.fastq.gz	KO_6DL_UNC2400_n_3	3	31390435	24177912	7044502	4065317	38032
This ChIP-seq analysis involved 28 samples, (wildtype: WT, and Tert-/-: KO; with input DNA and ChIP sample for each). Treatment groups are indicated in the sample name. Samples were prepared on different dates and labeled as experimental set 2 or 3.
Four treatments contained two biological replicates (KO_6DL_DMSO, KO_6DL_GSK343, KO_6DL_UNC1999, KO_UNC2400). The remaining samples contained 1 biological replicate.
A subset of DNA samples were sequenced multiple times (to acquire a sufficient number of reads). In these instances, the multiple entries are indicated as separate filenames in columns C-F.
The methological steps involved in each column above are described further in the Materials and Methods. Raw (fastq) and processed (.bdg) files associated with these samples are listed in Source Data file 4 and are deposited with the NCBI Gene Expression Omnibus.
This ATAC-seq analysis involved 56 samples across two genotypes (wildtype: WT, and mTert-/-: KO). Treatment groups for each genotype as indicated in the sample name. Samples were prepared on different dates and labeled as experimental sets 1-3.
All treatments contained two biological replicates. Three samples had 3 replicates: KO.2DL_undifferentiated, WT.2DL_undifferentiated, KO.6DL_unsorted-untreated, WT.6DL_GSK343). One sample had 4 biological replicates (KO.6DL_GSK343).
These additional replicates for a subset of samples were included to ensure reproducibility across the 3 experimental sets. Only 1 sample (filename: 180221.KO_6DA_GFP_pos_S6) failed the quality control for ATAC-seq and was not included in further analysis.
The methological steps involved in each column above are described further in the Materials and Methods. Raw (fastq) and processed (.bdg) files associated with these 56 samples are listed in Source Data file 2 and are deposited with the NCBI Gene Expression Omnibus.
