# Supplementary material for: Telomere dysfunction cooperates with epigenetic alterations to impair murine embryonic stem cell fate commitment
Source: eLife. 2020 Apr 16;9:e47333. doi: 10.7554/eLife.47333 (PMC7192583; doi:10.7554/eLife.47333)
Supplement: Figure 4—source data 4. [file elife-47333-fig4-data4.xls]

## Sheet: METADATA TEMPLATE 
# High-throughput sequencing metadata template (version 2.1).
# All fields in this template must be completed.
# Templates containing example data are found in the METADATA EXAMPLES spreadsheet tabs at the foot of this page.
# Field names (in blue on this page) should not be edited. Hover over cells containing field names to view field content guidelines.
# Human data. If there are patient privacy concerns regarding making data fully public through GEO, please submit to NCBI's dbGaP (http://www.ncbi.nlm.nih.gov/gap/) database. dbGaP has controlled access mechanisms and is an appropriate resource for hosting sensitive patient data.
SERIES
# This section describes the overall experiment.
title	Telomere dysfunction cooperates with epigenetic alterations to impair murine embryonic stem cell fate commitment
summary	This study demonstrates a specific cooperativity between perturbations in histone methylation and eroded telomeres to destabilize the differentiation of murine embryonic stem cells.
overall design	Murine embyronic stem cells of two different genotypes (WT or mTert-/-) were subjected to differentiation, and treated with compounds that modulated histone H3K27 tri-methylation to assess their impact upon the differentiation response
contributor	Mélanie Criqui
contributor	Tsz Wai Chu
contributor	Aditi Qamra
contributor	Monika Sharma
contributor	Julissa Tsao
contributor	Danielle Henry
contributor	Dalia Barsyte
contributor	Cheryl H. Arrowsmith
contributor	Neil Winegarden
contributor	Mathieu Lupien
contributor	Lea Harrington
supplementary file	Source data file 4 for Figure 4, Figure 4-figure supplement 1
SRA_center_name_code	[optional]
SAMPLES
# This section lists and describes each of the biological Samples under investgation, as well as any protocols that are specific to individual Samples.
# Additional "processed data file" or "raw file" columns may be included.
Sample name	title	source name	organism	characteristics: strain	characteristics: sequencing run#	characteristics: passage numbers	characteristics: treatment group	characteristics: sample preparation	molecule	description	processed data file	raw file	raw file	raw file	raw file
KO_2DL_n_2_input	KO_2DL_n_2_input	Tert-/- Embryonic stem cells	Mus musculus	129J	1	p45	KO_2DL	ChIP-seq	genomic DNA	Illumina sequencing		190808_A00827_0022_BHFMHKDRXX_Harrington/KO_2DL_n_2_input_S31_L002_R1_001.fastq.gz
KO_2DL_n_2	KO_2DL_n_2	Tert-/- Embryonic stem cells	Mus musculus	129J	1	p45	KO_2DL	ChIP-seq	genomic DNA	Illumina sequencing		190808_A00827_0022_BHFMHKDRXX_Harrington/KO_2DL_n_2_S1_L001_R1_001.fastq.gz
KO_6DL_DMSO_n_2_input	KO_6DL_DMSO_n_2_input	Tert-/- Embryonic stem cells	Mus musculus	129J	1	p45	KO_6DL_DMSO	ChIP-seq	genomic DNA	Illumina sequencing		190808_A00827_0022_BHFMHKDRXX_Harrington/KO_6DL_DMSO_n_2_input_S32_L002_R1_001.fastq.gz
KO_6DL_DMSO_n_2	KO_6DL_DMSO_n_2	Tert-/- Embryonic stem cells	Mus musculus	129J	1	p45	KO_6DL_DMSO	ChIP-seq	genomic DNA	Illumina sequencing		190808_A00827_0022_BHFMHKDRXX_Harrington/KO_6DL_DMSO_n_2_S2_L001_R1_001.fastq.gz
KO_6DL_GSK343_n_2_input	KO_6DL_GSK343_n_2_input	Tert-/- Embryonic stem cells	Mus musculus	129J	1	p45	KO_6DL_GSK343	ChIP-seq	genomic DNA	Illumina sequencing		190808_A00827_0022_BHFMHKDRXX_Harrington/KO_6DL_GSK343_n_2_input_S35_L002_R1_001.fastq.gz
KO_6DL_GSK343_n_2	KO_6DL_GSK343_n_2	Tert-/- Embryonic stem cells	Mus musculus	129J	1	p45	KO_6DL_GSK343	ChIP-seq	genomic DNA	Illumina sequencing		190808_A00827_0022_BHFMHKDRXX_Harrington/KO_6DL_GSK343_n_2_S24_L002_R1_001.fastq.gz	190827_A00827_0029_BHFMWNDRXX_Harrington_Lea/KO_6DL_GSK343_n_2_S69_L002_R1_001.fastq.gz	190913_A00827_0040_BHGH3YDRXX_Harrington/KO_6DL_GSK343_n_2_S8_L001_R1_001.fastq.gz	190913_A00827_0040_BHGH3YDRXX_Harrington/KO_6DL_GSK343_n_2_S8_L002_R1_001.fastq.gz
KO_6DL_UNC1999_n_2_input	KO_6DL_UNC1999_n_2_input	Tert-/- Embryonic stem cells	Mus musculus	129J	1	p45	KO_6DL_UNC1999	ChIP-seq	genomic DNA	Illumina sequencing		190808_A00827_0022_BHFMHKDRXX_Harrington/KO_6DL_UNC1999_n_2_input_S33_L002_R1_001.fastq.gz
KO_6DL_UNC1999_n_2	KO_6DL_UNC1999_n_2	Tert-/- Embryonic stem cells	Mus musculus	129J	1	p45	KO_6DL_UNC1999	ChIP-seq	genomic DNA	Illumina sequencing		190808_A00827_0022_BHFMHKDRXX_Harrington/KO_6DL_UNC1999_n_2_S22_L002_R1_001.fastq.gz
KO_6DL_UNC2400_n_2_input	KO_6DL_UNC2400_n_2_input	Tert-/- Embryonic stem cells	Mus musculus	129J	1	p45	KO_6DL_UNC2400	ChIP-seq	genomic DNA	Illumina sequencing		190808_A00827_0022_BHFMHKDRXX_Harrington/KO_6DL_UNC2400_n_2_input_S34_L002_R1_001.fastq.gz
KO_6DL_UNC2400_n_2	KO_6DL_UNC2400_n_2	Tert-/- Embryonic stem cells	Mus musculus	129J	1	p45	KO_6DL_UNC2400	ChIP-seq	genomic DNA	Illumina sequencing		190808_A00827_0022_BHFMHKDRXX_Harrington/KO_6DL_UNC2400_n_2_S23_L002_R1_001.fastq.gz
WT_2DL_n_2_input	WT_2DL_n_2_input	wild-type Embryonic stem cells	Mus musculus	129J	1	p66	WT_2DL	ChIP-seq	genomic DNA	Illumina sequencing		190925_A00827_0044_AHGLNWDRXX_Harrington_Aditi__Lea/WT_2D__n_2_input_S3_L002_R1_001.fastq.gz	190808_A00827_0022_BHFMHKDRXX_Harrington/WT_2DL_n_2_input_S13_L001_R1_001.fastq.gz
WT_2DL_n_2	WT_2DL_n_2	wild-type Embryonic stem cells	Mus musculus	129J	1	p66	WT_2DL	ChIP-seq	genomic DNA	Illumina sequencing		190808_A00827_0022_BHFMHKDRXX_Harrington/WT_2DL_n_2_S7_L001_R1_001.fastq.gz
WT_6DL_DMSO_n_2_input	WT_6DL_DMSO_n_2_input	wild-type Embryonic stem cells	Mus musculus	129J	1	p66	WT_6DL_DMSO	ChIP-seq	genomic DNA	Illumina sequencing		190808_A00827_0022_BHFMHKDRXX_Harrington/WT_6DL_DMSO_n_2_input_S14_L001_R1_001.fastq.gz
WT_6DL_DMSO_n_2	WT_6DL_DMSO_n_2	wild-type Embryonic stem cells	Mus musculus	129J	1	p66	WT_6DL_DMSO	ChIP-seq	genomic DNA	Illumina sequencing		190913_A00827_0040_BHGH3YDRXX_Harrington/WT_6DL_DMSO_n_2_S6_L001_R1_001.fastq.gz	190913_A00827_0040_BHGH3YDRXX_Harrington/WT_6DL_DMSO_n_2_S6_L002_R1_001.fastq.gz	190827_A00827_0029_BHFMWNDRXX_Harrington_Lea/WT_6DL_DMSO_n_2_S71_L002_R1_001.fastq.gz	190808_A00827_0022_BHFMHKDRXX_Harrington/WT_6DL_DMSO_n_2_S8_L001_R1_001.fastq.gz
WT_6DL_GSK343_n_2_input	WT_6DL_GSK343_n_2_input	wild-type Embryonic stem cells	Mus musculus	129J	1	p66	WT_6DL_GSK343	ChIP-seq	genomic DNA	Illumina sequencing		190808_A00827_0022_BHFMHKDRXX_Harrington/WT_6DL_GSK343_n_2_input_S19_L001_R1_001.fastq.gz
WT_6DL_GSK343_n_2	WT_6DL_GSK343_n_2	wild-type Embryonic stem cells	Mus musculus	129J	1	p66	WT_6DL_GSK343	ChIP-seq	genomic DNA	Illumina sequencing		190808_A00827_0022_BHFMHKDRXX_Harrington/WT_6DL_GSK343_n_2_S26_L002_R1_001.fastq.gz
WT_6DL_UNC1999_n_2_input	WT_6DL_UNC1999_n_2_input	wild-type Embryonic stem cells	Mus musculus	129J	1	p66	WT_6DL_UNC1999	ChIP-seq	genomic DNA	Illumina sequencing		190808_A00827_0022_BHFMHKDRXX_Harrington/WT_6DL_UNC1999_n_2_input_S15_L001_R1_001.fastq.gz
WT_6DL_UNC1999_n_2	WT_6DL_UNC1999_n_2	wild-type Embryonic stem cells	Mus musculus	129J	1	p66	WT_6DL_UNC1999	ChIP-seq	genomic DNA	Illumina sequencing		190913_A00827_0040_BHGH3YDRXX_Harrington/WT_6DL_UNC1999_n_2_S7_L001_R1_001.fastq.gz	190913_A00827_0040_BHGH3YDRXX_Harrington/WT_6DL_UNC1999_n_2_S7_L002_R1_001.fastq.gz	190827_A00827_0029_BHFMWNDRXX_Harrington_Lea/WT_6DL_UNC1999_n_2_S72_L002_R1_001.fastq.gz	190808_A00827_0022_BHFMHKDRXX_Harrington/WT_6DL_UNC1999_n_2_S9_L001_R1_001.fastq.gz
WT_6DL_UNC2400_n_2_input	WT_6DL_UNC2400_n_2_input	wild-type Embryonic stem cells	Mus musculus	129J	1	p66	WT_6DL_UNC2400	ChIP-seq	genomic DNA	Illumina sequencing		190808_A00827_0022_BHFMHKDRXX_Harrington/WT_6DL_UNC2400_n_2_input_S16_L001_R1_001.fastq.gz
WT_6DL_UNC2400_n_2	WT_6DL_UNC2400_n_2	wild-type Embryonic stem cells	Mus musculus	129J	1	p66	WT_6DL_UNC2400	ChIP-seq	genomic DNA	Illumina sequencing		190808_A00827_0022_BHFMHKDRXX_Harrington/WT_6DL_UNC2400_n_2_S25_L002_R1_001.fastq.gz	190827_A00827_0029_BHFMWNDRXX_Harrington_Lea/WT_6DL_UNC2400_n_2_S73_L002_R1_001.fastq.gz	190913_A00827_0040_BHGH3YDRXX_Harrington/WT_6DL_UNC2400_n_2_S9_L001_R1_001.fastq.gz	190913_A00827_0040_BHGH3YDRXX_Harrington/WT_6DL_UNC2400_n_2_S9_L002_R1_001.fastq.gz
KO_6DL_DMSO_n_3_input	KO_6DL_DMSO_n_3_input	Tert-/- Embryonic stem cells	Mus musculus	129J	2	p46	KO_6DL_DMSO	ChIP-seq	genomic DNA	Illumina sequencing		191120_A00827_0082_AHH7C7DRXX_Harrington/KO_6DL_DMSO_n_3_input_S12_L001_R1_001.fastq.gz	191120_A00827_0082_AHH7C7DRXX_Harrington/KO_6DL_DMSO_n_3_input_S12_L002_R1_001.fastq.gz	191107_A00827_0071_AHH5WHDRXX_Harrington/KO_6DL_DMSO_n_3_input_S17_L001_R1_001.fastq.gz	191107_A00827_0071_AHH5WHDRXX_Harrington/KO_6DL_DMSO_n_3_input_S17_L002_R1_001.fastq.gz
KO_6DL_DMSO_n_3	KO_6DL_DMSO_n_3	Tert-/- Embryonic stem cells	Mus musculus	129J	2	p46	KO_6DL_DMSO	ChIP-seq	genomic DNA	Illumina sequencing		191107_A00827_0071_AHH5WHDRXX_Harrington/KO_6DL_DMSO_n_3_S2_L001_R1_001.fastq.gz	191120_A00827_0082_AHH7C7DRXX_Harrington/KO_6DL_DMSO_n_3_S2_L001_R1_001.fastq.gz	191107_A00827_0071_AHH5WHDRXX_Harrington/KO_6DL_DMSO_n_3_S2_L002_R1_001.fastq.gz	191120_A00827_0082_AHH7C7DRXX_Harrington/KO_6DL_DMSO_n_3_S2_L002_R1_001.fastq.gz
KO_6DL_GSK343_n_3_input	KO_6DL_GSK343_n_3_input	Tert-/- Embryonic stem cells	Mus musculus	129J	2	p46	KO_6DL_GSK343	ChIP-seq	genomic DNA	Illumina sequencing		191120_A00827_0082_AHH7C7DRXX_Harrington/KO_6DL_GSK343_n_3_input_S15_L001_R1_001.fastq.gz	191120_A00827_0082_AHH7C7DRXX_Harrington/KO_6DL_GSK343_n_3_input_S15_L002_R1_001.fastq.gz	191107_A00827_0071_AHH5WHDRXX_Harrington/KO_6DL_GSK343_n_3_input_S20_L001_R1_001.fastq.gz	191107_A00827_0071_AHH5WHDRXX_Harrington/KO_6DL_GSK343_n_3_input_S20_L002_R1_001.fastq.gz
KO_6DL_GSK343_n_3	KO_6DL_GSK343_n_3	Tert-/- Embryonic stem cells	Mus musculus	129J	2	p46	KO_6DL_GSK343	ChIP-seq	genomic DNA	Illumina sequencing		191107_A00827_0071_AHH5WHDRXX_Harrington/KO_6DL_GSK343_n_3_S5_L001_R1_001.fastq.gz	191120_A00827_0082_AHH7C7DRXX_Harrington/KO_6DL_GSK343_n_3_S5_L001_R1_001.fastq.gz	191107_A00827_0071_AHH5WHDRXX_Harrington/KO_6DL_GSK343_n_3_S5_L002_R1_001.fastq.gz	191120_A00827_0082_AHH7C7DRXX_Harrington/KO_6DL_GSK343_n_3_S5_L002_R1_001.fastq.gz
KO_6DL_UNC1999_n_3_input	KO_6DL_UNC1999_n_3_input	Tert-/- Embryonic stem cells	Mus musculus	129J	2	p46	KO_6DL_UNC1999	ChIP-seq	genomic DNA	Illumina sequencing		191120_A00827_0082_AHH7C7DRXX_Harrington/KO_6DL_UNC1999_n_3_input_S13_L001_R1_001.fastq.gz	191120_A00827_0082_AHH7C7DRXX_Harrington/KO_6DL_UNC1999_n_3_input_S13_L002_R1_001.fastq.gz	191107_A00827_0071_AHH5WHDRXX_Harrington/KO_6DL_UNC1999_n_3_input_S18_L001_R1_001.fastq.gz	191107_A00827_0071_AHH5WHDRXX_Harrington/KO_6DL_UNC1999_n_3_input_S18_L002_R1_001.fastq.gz
KO_6DL_UNC1999_n_3	KO_6DL_UNC1999_n_3	Tert-/- Embryonic stem cells	Mus musculus	129J	2	p46	KO_6DL_UNC1999	ChIP-seq	genomic DNA	Illumina sequencing		191107_A00827_0071_AHH5WHDRXX_Harrington/KO_6DL_UNC1999_n_3_S3_L001_R1_001.fastq.gz	191120_A00827_0082_AHH7C7DRXX_Harrington/KO_6DL_UNC1999_n_3_S3_L001_R1_001.fastq.gz	191107_A00827_0071_AHH5WHDRXX_Harrington/KO_6DL_UNC1999_n_3_S3_L002_R1_001.fastq.gz	191120_A00827_0082_AHH7C7DRXX_Harrington/KO_6DL_UNC1999_n_3_S3_L002_R1_001.fastq.gz
KO_6DL_UNC2400_n_3_input	KO_6DL_UNC2400_n_3_input	Tert-/- Embryonic stem cells	Mus musculus	129J	2	p46	KO_6DL_UNC2400	ChIP-seq	genomic DNA	Illumina sequencing		191120_A00827_0082_AHH7C7DRXX_Harrington/KO_6DL_UNC2400_n_3_input_S14_L001_R1_001.fastq.gz	191120_A00827_0082_AHH7C7DRXX_Harrington/KO_6DL_UNC2400_n_3_input_S14_L002_R1_001.fastq.gz	191107_A00827_0071_AHH5WHDRXX_Harrington/KO_6DL_UNC2400_n_3_input_S19_L001_R1_001.fastq.gz	191107_A00827_0071_AHH5WHDRXX_Harrington/KO_6DL_UNC2400_n_3_input_S19_L002_R1_001.fastq.gz
KO_6DL_UNC2400_n_3	KO_6DL_UNC2400_n_3	Tert-/- Embryonic stem cells	Mus musculus	129J	2	p46	KO_6DL_UNC2400	ChIP-seq	genomic DNA	Illumina sequencing		191107_A00827_0071_AHH5WHDRXX_Harrington/KO_6DL_UNC2400_n_3_S4_L001_R1_001.fastq.gz	191120_A00827_0082_AHH7C7DRXX_Harrington/KO_6DL_UNC2400_n_3_S4_L001_R1_001.fastq.gz	191107_A00827_0071_AHH5WHDRXX_Harrington/KO_6DL_UNC2400_n_3_S4_L002_R1_001.fastq.gz	191120_A00827_0082_AHH7C7DRXX_Harrington/KO_6DL_UNC2400_n_3_S4_L002_R1_001.fastq.gz
PROTOCOLS
# Any of the protocols below which are applicable to only a subset of Samples should be included as additional columns of the SAMPLES section instead.
growth protocol	Murine embryonic stem cells were thawed (initial cell passage indicated), cultured in LIF containing media for 2 days (2DL), transferred to media containing 5 micromolar ATRA for a further 6 days (6DA) and transferred to LIF-containing media for a further 6 days (6DL).
treatment protocol	ESC populations were untreated (DMSO) or treated throughout the 14 day differentiation treatment with the compounds indicated: UNC1999, UNC2400, GSK343. The compound concentration was 1 micromolar for UNC1999 and UNC2400, and 3 micromolar GSK343.
extract protocol	ESC populations were harvested and crosslinked in formaldehyde. Cell pellets (frozen, or fresh) were subjected to chromatin preparation and immunopreciptiation with an antibody against H3K27me3, followed by extraction of genomic DNA.
library construction protocol	DNA samples were quantified, and libraries were generated and amplified by PCR, followed by library size determination using a Agilent BioAnalyzer.
library strategy	Libraries were then pooled, quantified, and sequenced on an Illumina MiSeq to determine the amount required for deep sequencing. Pooled libraries were then diluted accordingly and loaded on an Illumina NovSeq6000 for sequencing.
DATA PROCESSING PIPELINE
# Data processing steps include base-calling, alignment, filtering, peak-calling, generation of normalized abundance measurements etc…
# For each step provide a description, as well as software name, version, parameters, if applicable.
# Include additional steps, as necessary.
data processing step	Libraries were sequenced with 100 bp single-end reads
data processing step	Sequences were mapped to mm9 using Bowtie 2 (v2.0.5) with default parameters (http://bowtie-bio.sourceforge.net/bowtie2/index.shtml)
data processing step	Poor quality reads (MAPQ<=30, reads mapping to chrM, chrY and patch chromosomes were also removed.
data processing step	Reads were further filtered to remove PCR duplicates using Picard Tool MarkDuplicates (v2.6.0, https://broadinstitute.github.io/picard/). H3K27me3 peaks were called using MACS2 v2.0.10 using the following parameters: --keep-dup all -B -- broad -q 0.05.
data processing step	The signal intensity was calculated as the fold enrichment of the signal per million reads in a sample over the input sample. We then calculated the maximum signal intensity over every peak for conditions being compared using mapBed –o max and quantile normalized them across samples.
data processing step	Spearman correlation was then calculated between average normalized signal intensity across replicates for each condition which was then plotted in heatmap. Analysis of downstream peak calling were carried out using Bedtools v2.26.0 (https://bedtools.readthedocs.io/en/latest/) and R 3.4.1 (https://www.r-project.org/). Figures were plotted using ggplot2 (https://ggplot2.tidyverse.org/).
genome build	mm9
processed data files format and content	bedgraph
# For each file listed in the "processed data file" columns of the SAMPLES section, provide additional information below.
PROCESSED DATA FILES
file name	file type	file checksum
KO_2DL_n_2_broad_FE.bdg	bedgraph
KO_6DL_DMSO_n_2_broad_FE.bdg	bedgraph
KO_6DL_DMSO_n_3_broad_FE.bdg	bedgraph
KO_6DL_GSK343_n_2_broad_FE.bdg	bedgraph
KO_6DL_GSK343_n_3_broad_FE.bdg	bedgraph
KO_6DL_UNC1999_n_2_broad_FE.bdg	bedgraph
KO_6DL_UNC1999_n_3_broad_FE.bdg	bedgraph
KO_6DL_UNC2400_n_2_broad_FE.bdg	bedgraph
KO_6DL_UNC2400_n_3_broad_FE.bdg	bedgraph
WT_2DL_n_2_broad_FE.bdg	bedgraph
WT_6DL_DMSO_n_2_broad_FE.bdg	bedgraph
WT_6DL_GSK343_n_2_broad_FE.bdg	bedgraph
WT_6DL_UNC1999_n_2_broad_FE.bdg	bedgraph
WT_6DL_UNC2400_n_2_broad_FE.bdg	bedgraph
# For each file listed in the "raw file" columns of the SAMPLES section, provide additional information below.
RAW FILES
file name	file type	file checksum	instrument model	read length	single or paired-end
190808_A00827_0022_BHFMHKDRXX_Harrington/KO_2DL_n_2_input_S31_L002_R1_001.fastq.gz	fastq		Illumina NovaSeq 6000	100	single
190808_A00827_0022_BHFMHKDRXX_Harrington/KO_2DL_n_2_S1_L001_R1_001.fastq.gz	fastq		Illumina NovaSeq 6000	100	single
190808_A00827_0022_BHFMHKDRXX_Harrington/KO_6DL_DMSO_n_2_input_S32_L002_R1_001.fastq.gz	fastq		Illumina NovaSeq 6000	100	single
190808_A00827_0022_BHFMHKDRXX_Harrington/KO_6DL_DMSO_n_2_S2_L001_R1_001.fastq.gz	fastq		Illumina NovaSeq 6000	100	single
190808_A00827_0022_BHFMHKDRXX_Harrington/KO_6DL_GSK343_n_2_input_S35_L002_R1_001.fastq.gz	fastq		Illumina NovaSeq 6000	100	single
190808_A00827_0022_BHFMHKDRXX_Harrington/KO_6DL_GSK343_n_2_S24_L002_R1_001.fastq.gz	fastq		Illumina NovaSeq 6000	100	single
190808_A00827_0022_BHFMHKDRXX_Harrington/KO_6DL_UNC1999_n_2_input_S33_L002_R1_001.fastq.gz	fastq		Illumina NovaSeq 6000	100	single
190808_A00827_0022_BHFMHKDRXX_Harrington/KO_6DL_UNC1999_n_2_S22_L002_R1_001.fastq.gz	fastq		Illumina NovaSeq 6000	100	single
190808_A00827_0022_BHFMHKDRXX_Harrington/KO_6DL_UNC2400_n_2_input_S34_L002_R1_001.fastq.gz	fastq		Illumina NovaSeq 6000	100	single
190808_A00827_0022_BHFMHKDRXX_Harrington/KO_6DL_UNC2400_n_2_S23_L002_R1_001.fastq.gz	fastq		Illumina NovaSeq 6000	100	single
190925_A00827_0044_AHGLNWDRXX_Harrington_Aditi__Lea/WT_2D__n_2_input_S3_L002_R1_001.fastq.gz	fastq		Illumina NovaSeq 6000	100	single
190808_A00827_0022_BHFMHKDRXX_Harrington/WT_2DL_n_2_S7_L001_R1_001.fastq.gz	fastq		Illumina NovaSeq 6000	100	single
190808_A00827_0022_BHFMHKDRXX_Harrington/WT_6DL_DMSO_n_2_input_S14_L001_R1_001.fastq.gz	fastq		Illumina NovaSeq 6000	100	single
190913_A00827_0040_BHGH3YDRXX_Harrington/WT_6DL_DMSO_n_2_S6_L001_R1_001.fastq.gz	fastq		Illumina NovaSeq 6000	100	single
190808_A00827_0022_BHFMHKDRXX_Harrington/WT_6DL_GSK343_n_2_input_S19_L001_R1_001.fastq.gz	fastq		Illumina NovaSeq 6000	100	single
190808_A00827_0022_BHFMHKDRXX_Harrington/WT_6DL_GSK343_n_2_S26_L002_R1_001.fastq.gz	fastq		Illumina NovaSeq 6000	100	single
190808_A00827_0022_BHFMHKDRXX_Harrington/WT_6DL_UNC1999_n_2_input_S15_L001_R1_001.fastq.gz	fastq		Illumina NovaSeq 6000	100	single
190913_A00827_0040_BHGH3YDRXX_Harrington/WT_6DL_UNC1999_n_2_S7_L001_R1_001.fastq.gz	fastq		Illumina NovaSeq 6000	100	single
190808_A00827_0022_BHFMHKDRXX_Harrington/WT_6DL_UNC2400_n_2_input_S16_L001_R1_001.fastq.gz	fastq		Illumina NovaSeq 6000	100	single
190808_A00827_0022_BHFMHKDRXX_Harrington/WT_6DL_UNC2400_n_2_S25_L002_R1_001.fastq.gz	fastq		Illumina NovaSeq 6000	100	single
191120_A00827_0082_AHH7C7DRXX_Harrington/KO_6DL_DMSO_n_3_input_S12_L001_R1_001.fastq.gz	fastq		Illumina NovaSeq 6000	100	single
191107_A00827_0071_AHH5WHDRXX_Harrington/KO_6DL_DMSO_n_3_S2_L001_R1_001.fastq.gz	fastq		Illumina NovaSeq 6000	100	single
191120_A00827_0082_AHH7C7DRXX_Harrington/KO_6DL_GSK343_n_3_input_S15_L001_R1_001.fastq.gz	fastq		Illumina NovaSeq 6000	100	single
191107_A00827_0071_AHH5WHDRXX_Harrington/KO_6DL_GSK343_n_3_S5_L001_R1_001.fastq.gz	fastq		Illumina NovaSeq 6000	100	single
191120_A00827_0082_AHH7C7DRXX_Harrington/KO_6DL_UNC1999_n_3_input_S13_L001_R1_001.fastq.gz	fastq		Illumina NovaSeq 6000	100	single
191107_A00827_0071_AHH5WHDRXX_Harrington/KO_6DL_UNC1999_n_3_S3_L001_R1_001.fastq.gz	fastq		Illumina NovaSeq 6000	100	single
191120_A00827_0082_AHH7C7DRXX_Harrington/KO_6DL_UNC2400_n_3_input_S14_L001_R1_001.fastq.gz	fastq		Illumina NovaSeq 6000	100	single
191107_A00827_0071_AHH5WHDRXX_Harrington/KO_6DL_UNC2400_n_3_S4_L001_R1_001.fastq.gz	fastq		Illumina NovaSeq 6000	100	single
190827_A00827_0029_BHFMWNDRXX_Harrington_Lea/KO_6DL_GSK343_n_2_S69_L002_R1_001.fastq.gz	fastq		Illumina NovaSeq 6000	100	single
190808_A00827_0022_BHFMHKDRXX_Harrington/WT_2DL_n_2_input_S13_L001_R1_001.fastq.gz	fastq		Illumina NovaSeq 6000	100	single
190913_A00827_0040_BHGH3YDRXX_Harrington/WT_6DL_DMSO_n_2_S6_L002_R1_001.fastq.gz	fastq		Illumina NovaSeq 6000	100	single
190913_A00827_0040_BHGH3YDRXX_Harrington/WT_6DL_UNC1999_n_2_S7_L002_R1_001.fastq.gz	fastq		Illumina NovaSeq 6000	100	single
190827_A00827_0029_BHFMWNDRXX_Harrington_Lea/WT_6DL_UNC2400_n_2_S73_L002_R1_001.fastq.gz	fastq		Illumina NovaSeq 6000	100	single
191120_A00827_0082_AHH7C7DRXX_Harrington/KO_6DL_DMSO_n_3_input_S12_L002_R1_001.fastq.gz	fastq		Illumina NovaSeq 6000	100	single
191120_A00827_0082_AHH7C7DRXX_Harrington/KO_6DL_DMSO_n_3_S2_L001_R1_001.fastq.gz	fastq		Illumina NovaSeq 6000	100	single
191120_A00827_0082_AHH7C7DRXX_Harrington/KO_6DL_GSK343_n_3_input_S15_L002_R1_001.fastq.gz	fastq		Illumina NovaSeq 6000	100	single
191120_A00827_0082_AHH7C7DRXX_Harrington/KO_6DL_GSK343_n_3_S5_L001_R1_001.fastq.gz	fastq		Illumina NovaSeq 6000	100	single
191120_A00827_0082_AHH7C7DRXX_Harrington/KO_6DL_UNC1999_n_3_input_S13_L002_R1_001.fastq.gz	fastq		Illumina NovaSeq 6000	100	single
191120_A00827_0082_AHH7C7DRXX_Harrington/KO_6DL_UNC1999_n_3_S3_L001_R1_001.fastq.gz	fastq		Illumina NovaSeq 6000	100	single
191120_A00827_0082_AHH7C7DRXX_Harrington/KO_6DL_UNC2400_n_3_input_S14_L002_R1_001.fastq.gz	fastq		Illumina NovaSeq 6000	100	single
191120_A00827_0082_AHH7C7DRXX_Harrington/KO_6DL_UNC2400_n_3_S4_L001_R1_001.fastq.gz	fastq		Illumina NovaSeq 6000	100	single
190913_A00827_0040_BHGH3YDRXX_Harrington/KO_6DL_GSK343_n_2_S8_L001_R1_001.fastq.gz	fastq		Illumina NovaSeq 6000	100	single
190827_A00827_0029_BHFMWNDRXX_Harrington_Lea/WT_6DL_DMSO_n_2_S71_L002_R1_001.fastq.gz	fastq		Illumina NovaSeq 6000	100	single
190827_A00827_0029_BHFMWNDRXX_Harrington_Lea/WT_6DL_UNC1999_n_2_S72_L002_R1_001.fastq.gz	fastq		Illumina NovaSeq 6000	100	single
190913_A00827_0040_BHGH3YDRXX_Harrington/WT_6DL_UNC2400_n_2_S9_L001_R1_001.fastq.gz	fastq		Illumina NovaSeq 6000	100	single
191107_A00827_0071_AHH5WHDRXX_Harrington/KO_6DL_DMSO_n_3_input_S17_L001_R1_001.fastq.gz	fastq		Illumina NovaSeq 6000	100	single
191107_A00827_0071_AHH5WHDRXX_Harrington/KO_6DL_DMSO_n_3_S2_L002_R1_001.fastq.gz	fastq		Illumina NovaSeq 6000	100	single
191107_A00827_0071_AHH5WHDRXX_Harrington/KO_6DL_GSK343_n_3_input_S20_L001_R1_001.fastq.gz	fastq		Illumina NovaSeq 6000	100	single
191107_A00827_0071_AHH5WHDRXX_Harrington/KO_6DL_GSK343_n_3_S5_L002_R1_001.fastq.gz	fastq		Illumina NovaSeq 6000	100	single
191107_A00827_0071_AHH5WHDRXX_Harrington/KO_6DL_UNC1999_n_3_input_S18_L001_R1_001.fastq.gz	fastq		Illumina NovaSeq 6000	100	single
191107_A00827_0071_AHH5WHDRXX_Harrington/KO_6DL_UNC1999_n_3_S3_L002_R1_001.fastq.gz	fastq		Illumina NovaSeq 6000	100	single
191107_A00827_0071_AHH5WHDRXX_Harrington/KO_6DL_UNC2400_n_3_input_S19_L001_R1_001.fastq.gz	fastq		Illumina NovaSeq 6000	100	single
191107_A00827_0071_AHH5WHDRXX_Harrington/KO_6DL_UNC2400_n_3_S4_L002_R1_001.fastq.gz	fastq		Illumina NovaSeq 6000	100	single
190913_A00827_0040_BHGH3YDRXX_Harrington/KO_6DL_GSK343_n_2_S8_L002_R1_001.fastq.gz	fastq		Illumina NovaSeq 6000	100	single
190808_A00827_0022_BHFMHKDRXX_Harrington/WT_6DL_DMSO_n_2_S8_L001_R1_001.fastq.gz	fastq		Illumina NovaSeq 6000	100	single
190808_A00827_0022_BHFMHKDRXX_Harrington/WT_6DL_UNC1999_n_2_S9_L001_R1_001.fastq.gz	fastq		Illumina NovaSeq 6000	100	single
190913_A00827_0040_BHGH3YDRXX_Harrington/WT_6DL_UNC2400_n_2_S9_L002_R1_001.fastq.gz	fastq		Illumina NovaSeq 6000	100	single
191107_A00827_0071_AHH5WHDRXX_Harrington/KO_6DL_DMSO_n_3_input_S17_L002_R1_001.fastq.gz	fastq		Illumina NovaSeq 6000	100	single
191120_A00827_0082_AHH7C7DRXX_Harrington/KO_6DL_DMSO_n_3_S2_L002_R1_001.fastq.gz	fastq		Illumina NovaSeq 6000	100	single
191107_A00827_0071_AHH5WHDRXX_Harrington/KO_6DL_GSK343_n_3_input_S20_L002_R1_001.fastq.gz	fastq		Illumina NovaSeq 6000	100	single
191120_A00827_0082_AHH7C7DRXX_Harrington/KO_6DL_GSK343_n_3_S5_L002_R1_001.fastq.gz	fastq		Illumina NovaSeq 6000	100	single
191107_A00827_0071_AHH5WHDRXX_Harrington/KO_6DL_UNC1999_n_3_input_S18_L002_R1_001.fastq.gz	fastq		Illumina NovaSeq 6000	100	single
191120_A00827_0082_AHH7C7DRXX_Harrington/KO_6DL_UNC1999_n_3_S3_L002_R1_001.fastq.gz	fastq		Illumina NovaSeq 6000	100	single
191107_A00827_0071_AHH5WHDRXX_Harrington/KO_6DL_UNC2400_n_3_input_S19_L002_R1_001.fastq.gz	fastq		Illumina NovaSeq 6000	100	single
191120_A00827_0082_AHH7C7DRXX_Harrington/KO_6DL_UNC2400_n_3_S4_L002_R1_001.fastq.gz	fastq		Illumina NovaSeq 6000	100	single
# For paired-end experiments, list the 2 associated raw files, and provide average insert size and standard deviation, if known. For SOLiD experiments, list the 4 file names (include "file name 3" and "file name 4" columns).
PAIRED-END EXPERIMENTS
file name 1	file name 2	average insert size	standard deviation
