# Supplementary material for: Telomere dysfunction cooperates with epigenetic alterations to impair murine embryonic stem cell fate commitment
Source: eLife. 2020 Apr 16;9:e47333. doi: 10.7554/eLife.47333 (PMC7192583; doi:10.7554/eLife.47333)
Supplement: Supplementary file 1. — Supplemental information about sequence-based reagents, cells lines, antibodies, chemical compounds, software, algorithms and commercial kits used in this study. [file elife-47333-supp1.xlsx]

## Sheet: Template
Key Resources Table
Reagent type (species) or resource	Designation	Source or reference	Identifiers	Additional information
cell line (mus musculus)	mESC E14 WT (derived from R129J strain, male)	(Liu et al. 2000) doi:10.1016/S0960-9822(00)00805-8	NA
cell line (mus musculus)	mESC E14 Tert-/- (derived from R129J strain, male)	(Liu et al. 2000) doi:10.1016/S0960-9822(00)00805-8	NA
antibody (Rabbit polyclonal)	anti H3K27me3 (Rabbit polyclonal)	Active motif distributed by Cedarlane, Burlington, ON, Canada	Cat# : 39155 ; RRID: AB_2561020	western blot : 1/500. ChiP-seq : 5 mg
antibody (Rabbit polyclonal)	anti Histone H3 (Rabbit polyclonal)	Abcam, Toronto, ON, Canada	Cat#: 1791 ; lot: GR173636-1; RRID:AB_302613	western blot : 1/20000
antibody (Rabbit polyclonal)	anti Hsp90ab1 (Rabbit polyclonal)	VWR, VWR, Mont-Royal QC, Canada	Cat#: 10088-510 ; lot: 00001927	western blot : 1/1000
antibody (Rabbit polyclonal)	anti-Nanog (Rabbit polyclonal)	Bethyl laboratories distributed by Cedarlane, Burlington, ON, Canada	Cat#: A300-397A RRID:AB_386108	western blot : 1/1000
Other	Secondary HSP antibody Veryblot for IP detection reagent	Abcam, Abcam, Toronto, ON, Canada	Cat#; AB131366 ; lot: GR3185668-3	western blot : 1/1000
commercial assay, kit	RT2 First Strand Kit (50)	Qiagen, Toronto, ON, Canada	Cat#: 330404
commercial assay, kit	RT2 SYBR Green ROX qPCR Mastermix (24)	Qiagen, Toronto, ON, Canada	Cat#: 330523
commercial assay, kit	miRNeasy Mini Kit (50)	Qiagen, Toronto, ON, Canada	Cat#: 217004
commercial assay, kit	PAMM-508ZC 24 RT2 ProfilerTM PCR array Mouse Cell lineage identification	Qiagen, Toronto, ON, Canada	Cat#: 330231
commercial assay, kit	Nextera DNA Library Prep Kit	Illumina, San Diego, CA, USA	Cat#: FC-121-1030
commercial assay, kit	MinElute PCR Purificaiton Kit	Qiagen, Toronto, ON, Canada	Cat#: 28004
commercial assay, kit	2x Kapa SYBER FAST Master Mix	Roche, distributed by Sigma-Aldrich, Oakville, ON, Canada	Cat#: 7959389001
commercial assay, kit	Protein A Dynadeabs	hermo-Fisher, Nepean, ON, Canad	Cat#10002D
commercial assay, kit	Kapa Library Quantification Kit	Roche, distributed by Sigma-Aldrich, Oakville, ON, Canada	Cat#: 7960140001
chemical compound, drug	UNC1999	Structural Genomic Consortium, Toronto, ON, Canada	https://www.thesgc.org ; https://www.thesgc.org/chemical-probes/UNC1999
chemical compound, drug	UNC2400	Structural Genomic Consortium, Toronto, ON, Canad	https://www.thesgc.org ;
chemical compound, drug	GSK343	Structural Genomic Consortium, Medchem express	https://www.thesgc.org ; https://www.thesgc.org/chemical-probes/GSK343 ; HY-13500
chemical compound, drug	A395	Structural Genomic Consortium ; Sigma	https://www.thesgc.org ; (He et al. 2017); SML1879-25MG
chemical compound, drug	A395N	Structural Genomic Consortium ; Sigma	https://www.thesgc.org ; SML1923-5MG
chemical compound, drug	GSKJ4	Structural Genomic Consortium ; Medchem express NY, USA, distributed in Canada by Cedarlane, Burlington, ON, Canada	https://www.thesgc.org/chemical-probes/GSKJ1 ; HY-15648B
chemical compound, drug	GSKJ5	Structural Genomic Consortium ;	https://www.thesgc.org/chemical-probes/GSKJ1
chemical compound, drug	1000 U/ml of ESGRO LIF	Millipore/Sigma	Cat#: ESG1107
chemical compound, drug	All trans retinoid acid	Sigma	Cat#: R2625-50MG
chemical compound, drug	Colcemid	Gibco, Invitrogen, acquired by Thermo-Fisher, Nepean, ON, Canada	Cat#: 15210-040
chemical compound, drug	Cy3 TelC probe	Pnabio, distributed by Cedarlane	Cat#: F1002
chemical compound, drug	Vectashield with DAPI	vector laboratories, distributed by MJS BioLynx, Brockville, ON, Canada	Cat#: H-1200
software, algorithm	Qiagen Data Analysis Center Web-based software	Qiagen, Toronto, ON, Canada	https://www.qiagen.com/us/shop/genes-and-pathways/data-analysis-center-overview-page/
software, algorithm	ClustVis	https://biit.cs.ut.ee/clustvis/	https://biit.cs.ut.ee/clustvis/
software, algorithm	Real Statistics	NA	http://www.real-statistics.com/multivariate-statistics/cluster-analysis/k-means-cluster-analysis/
software, algorithm	Picard Tool MarkDuplicates	NA	(v2.6.0, https://broadinstitute.github.io/picard/)
software, algorithm	Prism	Graphpad	NA
software, algorithm	BoxpolR	http://shiny.chemgrid.org/boxplotr/	NA
software, algorithm	CTCTCTGCTCCTCCTGTTCG	(Zhang, 2008); doi.org/10.1186/gb-2008-9-9-r137	NA
software, algorithm	bedtools v2.26.0	NA	https://bedtools.readthedocs.io/en/latest/
software, algorithm	ggplot2	NA	NA
software, algorithm	R 3.4.1	NA	https://www.r-project.org/
Sequence-based reagent	Ad1	IDT, Coralville, Iowa, USA	NA	AAT GAT ACG GCG ACC ACC GAG ATC TAC ACT CGT CGG CAG CGT CAG ATG TG
Sequence-based reagent	Ad2.3	IDT, Coralville, Iowa, USA	NA	CAA GCA GAA GAC GGC ATA CGA GAT TTC TGC CTG TCT CGT GGG CTC GGA GAT GTG
Sequence-based reagent	Ad2.4	IDT, Coralville, Iowa, USA	NA	CAA GCA GAA GAC GGC ATA CGA GAT GCT CAG GAG TCT CGT GGG CTC GGA GAT GTG
Sequence-based reagent	Ad2.5	IDT, Coralville, Iowa, USA	NA	CAA GCA GAA GAC GGC ATA CGA GAT AGG AGT CCG TCT CGT GGG CTC GGA GAT GTG
Sequence-based reagent	Ad2.6	IDT, Coralville, Iowa, USA	NA	CAA GCA GAA GAC GGC ATA CGA GAT CAT GCC TAG TCT CGT GGG CTC GGA GAT GTG
Sequence-based reagent	Ad2.7	IDT, Coralville, Iowa, USA	NA	CAA GCA GAA GAC GGC ATA CGA GAT GTA GAG AGG TCT CGT GGG CTC GGA GAT GTG
Sequence-based reagent	Ad2.8	IDT, Coralville, Iowa, USA	NA	CAA GCA GAA GAC GGC ATA CGA GAT CCT CTC TGG TCT CGT GGG CTC GGA GAT GTG
Sequence-based reagent	Ad2.9	IDT, Coralville, Iowa, USA	NA	CAA GCA GAA GAC GGC ATA CGA GAT AGC GTA GCG TCT CGT GGG CTC GGA GAT GTG
Sequence-based reagent	Ad2.10	IDT, Coralville, Iowa, USA	NA	CAA GCA GAA GAC GGC ATA CGA GAT CAG CCT CGG TCT CGT GGG CTC GGA GAT GTG
Sequence-based reagent	Ad2.11	IDT, Coralville, Iowa, USA	NA	CAA GCA GAA GAC GGC ATA CGA GAT TGC CTC TTG TCT CGT GGG CTC GGA GAT GTG
Sequence-based reagent	Ad2.12	IDT, Coralville, Iowa, USA	NA	CAA GCA GAA GAC GGC ATA CGA GAT TCC TCT ACG TCT CGT GGG CTC GGA GAT GTG
Sequence-based reagent	Ad2.13	IDT, Coralville, Iowa, USA	NA	CAA GCA GAA GAC GGC ATA CGA GAT CAG ATC CAG TCT CGT GGG CTC GGA GAT GTG
Sequence-based reagent	GAPDH-Forward	IDT, Coralville, Iowa, USA	NA	CTCTCTGCTCCTCCTGTTCG
Sequence-based reagent	GAPDH-Reverse	IDT, Coralville, Iowa, USA	NA	TTTCTCTCCGCCCGTCTTC
Sequence-based reagent	KAT6B-Forward	IDT, Coralville, Iowa, USA	NA	GAAGAGGCGGACCCAGCGGT
Sequence-based reagent	KAT6B-Reverse	IDT, Coralville, Iowa, USA	NA	TTCCTGCCGGTCATCTCGCTT
Sequence-based reagent	QML7 (Forward)	IDT, Coralville, Iowa, USA	NA	AACCTCGCTATGCTCCCTTC
Sequence-based reagent	QML8 (Reverse)	IDT, Coralville, Iowa, USA	NA	TGTGTGCCTTTCATCTGGAG
Sequence-based reagent	sgRNA Ezh2	Synthego, Menlo Park, CA, USA	NA	ACCAAGAGUGGAAGCAGCGG
Sequence-based reagent	sgRNA JMJD3	Synthego, Menlo Park, CA, USA	NA	CCGUGAAGGGGUCUUGGGGU
Sequence-based reagent	Negative Control sgRNA (modified) #1 Add-On Product	Synthego, Menlo Park, CA, USA	NA
Sequence-based reagent	Ezh2 indel seq. Fw	IDT, Coralville, Iowa, USA	NA	AGGCATTTGTTTTATGGCTTTGTGT
Sequence-based reagent	Ezh2 indel seq. Rv	IDT, Coralville, Iowa, USA	NA	AGGCTGCCACTGATACACACTGA
Sequence-based reagent	Kdm6b indel seq. Fw	IDT, Coralville, Iowa, USA	NA	CTCCATTCTAGGGGGAAGCGTGAT
Sequence-based reagent	Kdm6b indel seq. Rv	IDT, Coralville, Iowa, USA	NA	GGCATGAGCATAGCCAGCTGCA
Sequence-based reagent	Ezh2 Rt-qPCR Fw	IDT, Coralville, Iowa, USA	NA	AGTGACTTGGATTTTCCAGCAC
Sequence-based reagent	Ezh2 Rt-qPCR Rv	IDT, Coralville, Iowa, USA	NA	AATTCTGTTGTAAGGGCGACC
Sequence-based reagent	Eed Rt-qPCR Fw	IDT, Coralville, Iowa, USA	NA	ATGCTGTCAGTATTGAGAGTGGC
Sequence-based reagent	Eed Rt-qPCR Rv	IDT, Coralville, Iowa, USA	NA	GAGGCTGTTCACACATTTGAAAG
Sequence-based reagent	Suz12 Rt-qPCR Fw	IDT, Coralville, Iowa, USA	NA	TGCCACTAGAAATTCAGAGAGCC
Sequence-based reagent	Suz12 Rt-qPCR Rv	IDT, Coralville, Iowa, USA	NA	TTGTGCAGGTTTAACAGAACCA
Sequence-based reagent	Gdph Rt-qPCR Fw	IDT, Coralville, Iowa, USA	NA	TTCTGGTGCTTGTCTCACTGA
Sequence-based reagent	Gdph Rt-qPCR Rv	IDT, Coralville, Iowa, USA	NA	CAGTATGTTCGGCTTCCCATTC
Sequence-based reagent	B2m Rt-qPCR Fw	IDT, Coralville, Iowa, USA	NA	TTCTGGTGCTTGTCTCACTGA
Sequence-based reagent	B2m Rt-qPCR Rv	IDT, Coralville, Iowa, USA	NA	CAGTATGTTCGGCTTCCCATTC
Sequence-based reagent	Kdm6a Rt-qPCR Fw	IDT, Coralville, Iowa, USA	NA	CGGGCGGACAAAAGAAGAAC
Sequence-based reagent	Kdm6a Rt-qPCR Rv	IDT, Coralville, Iowa, USA	NA	CATAGACTTGCATCAGATCCTCC
Sequence-based reagent	Kdm6b Rt-qPCR Fw	IDT, Coralville, Iowa, USA	NA	TGAAGAACGTCAAGTCCATTGTG
Sequence-based reagent	Kdm6b Rt-qPCR Rv	IDT, Coralville, Iowa, USA	NA	TCCCGCTGTACCTGACAGT
commercial assay or kit	Qubit™ 1X dsDNA HS Assay Kit	ThermoFisher Scientific, Waltham,Massachusetts, USA	Cat# Q32851
commercial assay or kit	SMARTer® ThruPLEX® DNA-Seq Kit	Takara Bio USA, Inc. (TBUSA, formerly known as Clontech Laboratories, Inc.)	Cat# R400676
commercial assay or kit	SMARTer® DNA Unique Dual Index Kit - 24U Set A	Takara Bio USA, Inc. (TBUSA, formerly known as Clontech Laboratories, Inc.)	Cat# R400665
commercial assay or kit	SMARTer® DNA Unique Dual Index Kit - 24U Set B	Takara Bio USA, Inc. (TBUSA, formerly known as Clontech Laboratories, Inc.)	Cat# R400666
commercial assay or kit	SYBR™ Green I Nucleic Acid Gel Stain	ThermoFisher Scientific	Cat# S7563
commercial assay or kit	AMPure XP	BeckmanCoulter, Indianapolis, IN, USA	Cat# A63882
commercial assay or kit	MiSeq Reagent Nano Kit v2 300 Cycles	Illumina, San Diego, CA, USA	Cat# MS-103-1001
commercial assay or kit	NovaSeq 6000 SP Reagent Kit 100 cycles	Illumina, San Diego, CA, USA	Cat# 20027464
commercial assay or kit	NovaSeq Xp 2-Lane Kit	Illumina, San Diego, CA, USA	Cat# 20021664
