# Supplementary figures and images for: Telomere dysfunction cooperates with epigenetic alterations to impair murine embryonic stem cell fate commitment
Source: eLife journal article supplement (doi:10.7554/elife.47333), 2020-04-16

A

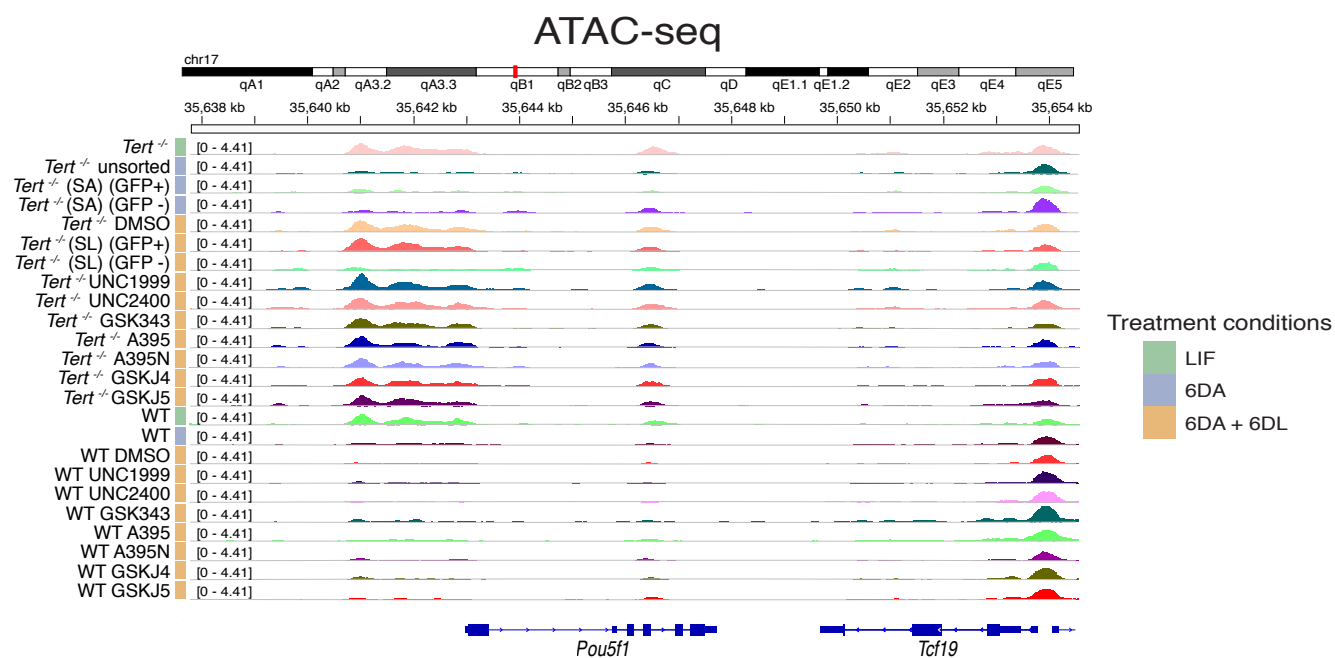

B

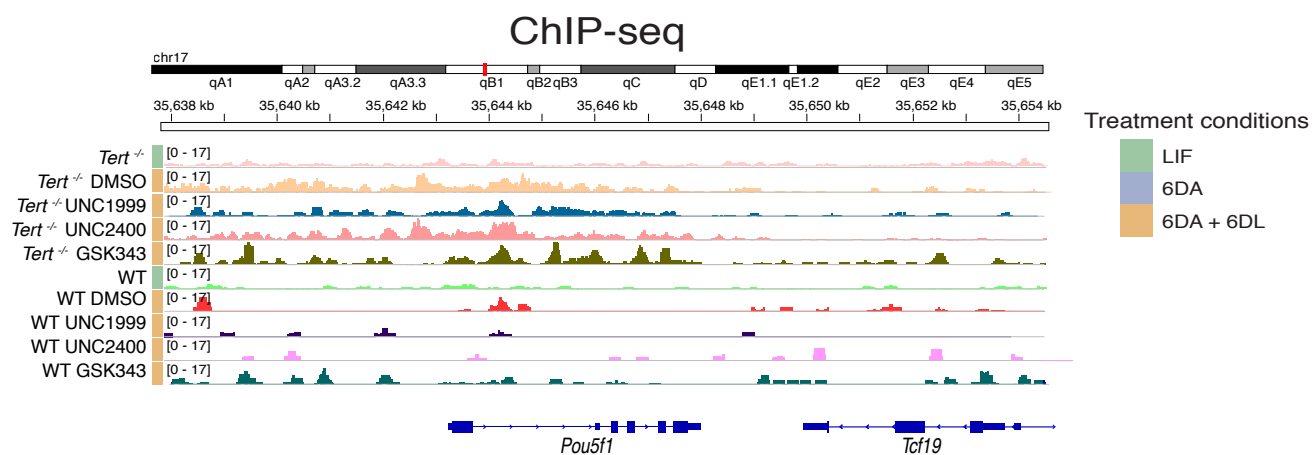

C

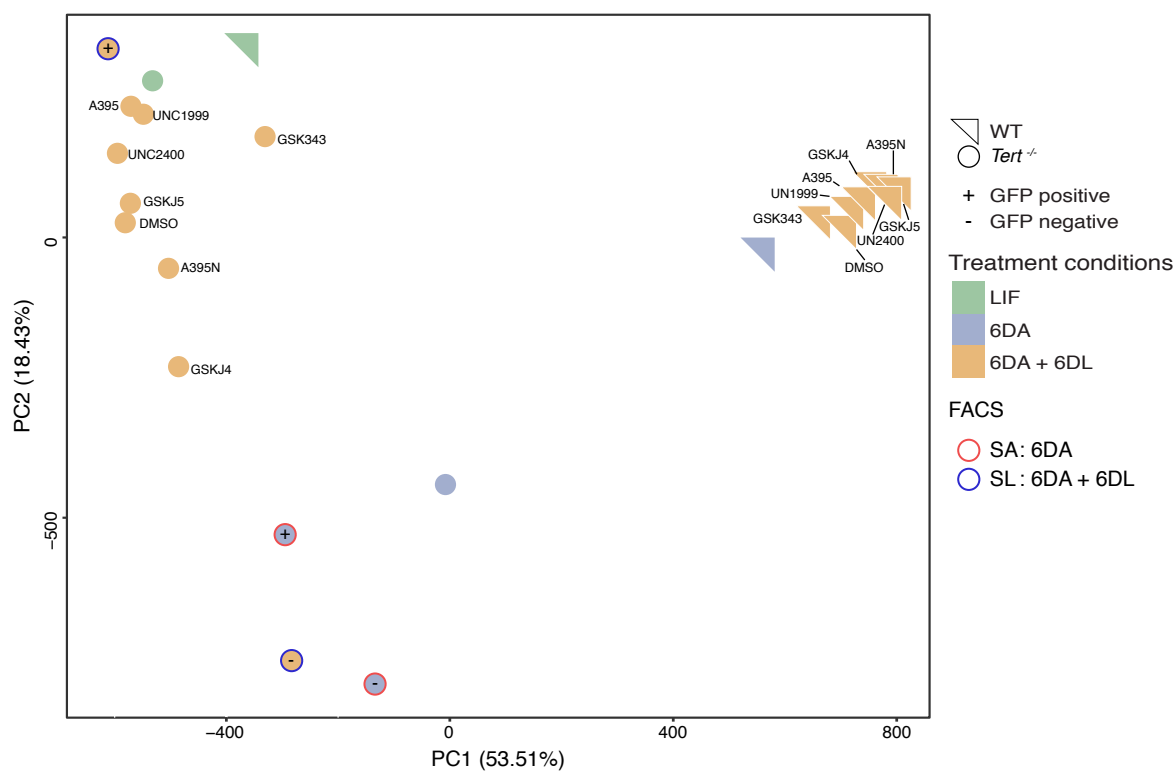

Figure 4 -figure supplement 1

Supplement: supp [file elife-47333-supp-v1.zip]

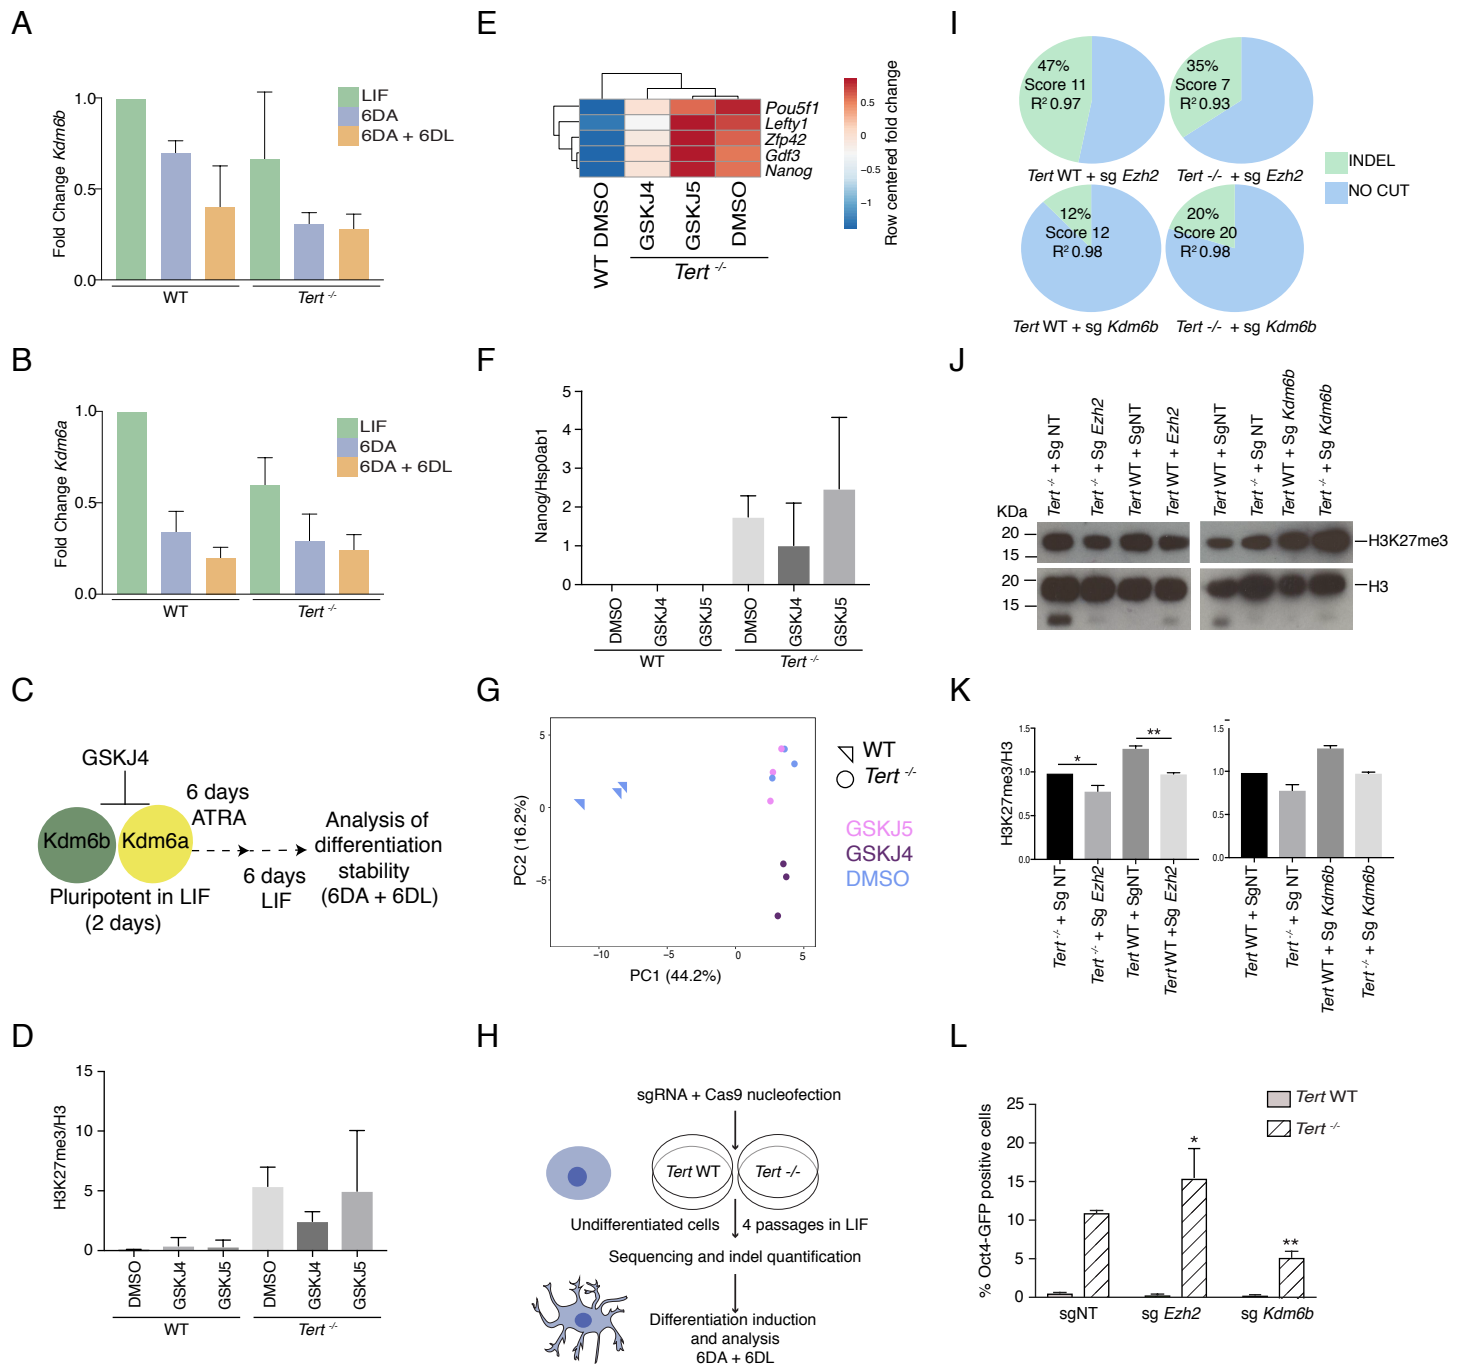

Figure 3-figure supplement 1

Supplement: supp [file elife-47333-supp-v1.zip]

A

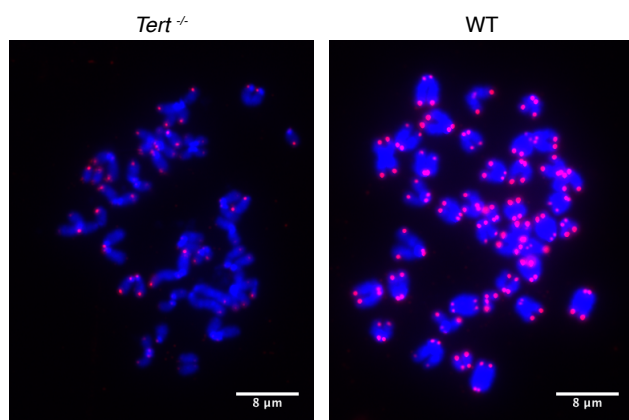

B

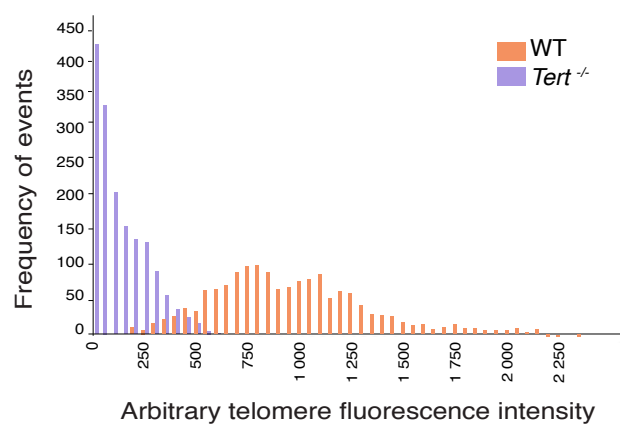

C

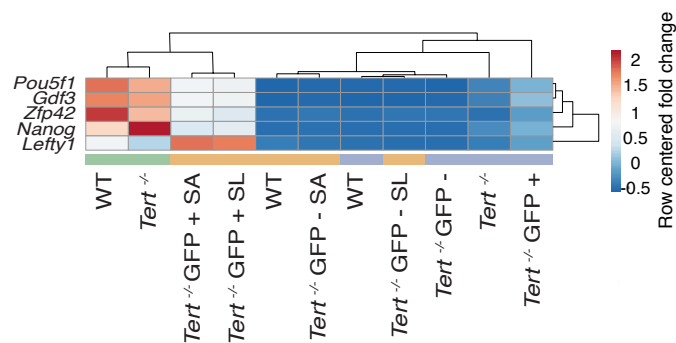

D

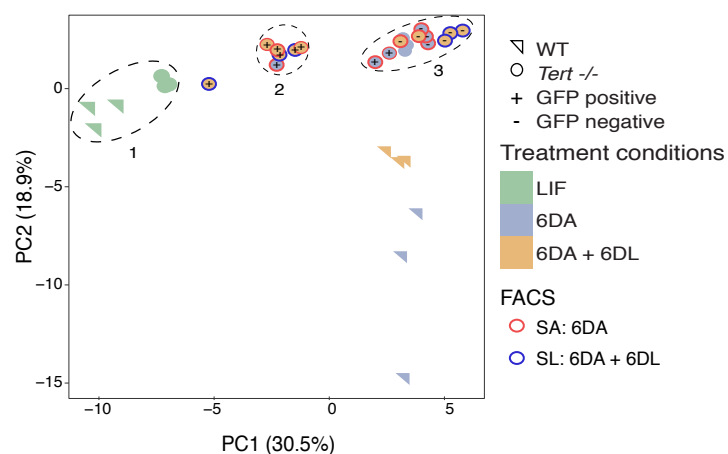

E

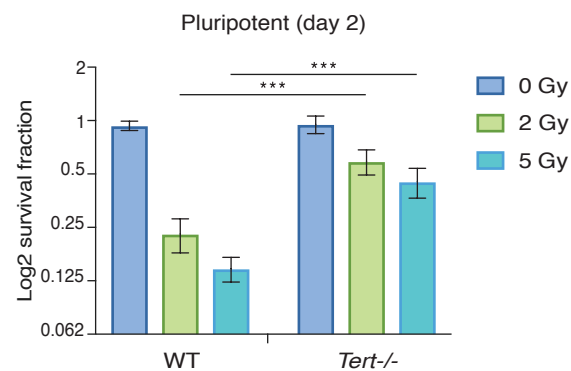

F

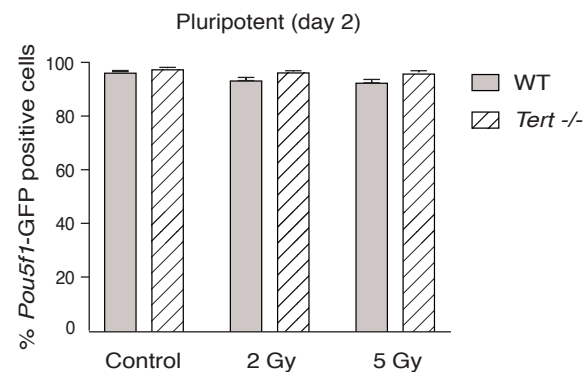

G

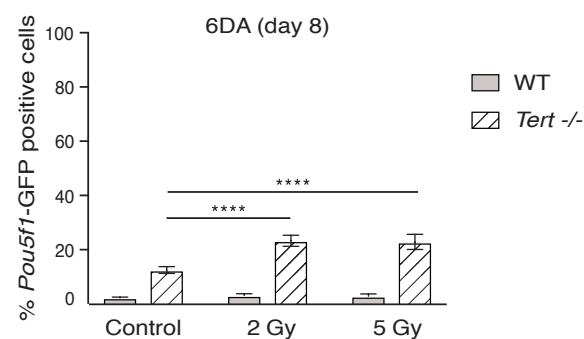

H

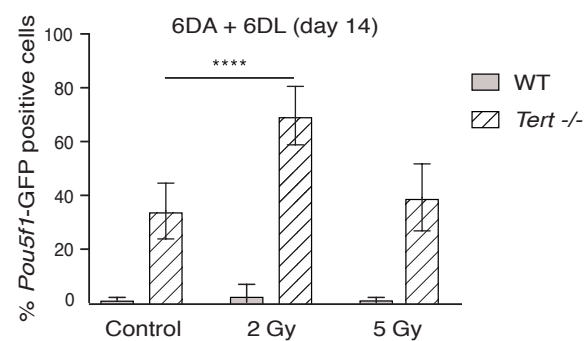

Figure 1 - figure supplement 1

Supplement: supp [file elife-47333-supp-v1.zip]
